# Supplementary material for: Asperflavipines C–E and aspermichalasine A: three cytochalasan heterotetramers and an unusual cytochalasan monomer from Aspergillus micronesiensis
Source: Royal Society of Chemistry journal article supplement (doi:10.1039/d2qo00309k), 2022-01-01
Supplement: d2qo00309k1.pdf [file d2qo00309k1.pdf]

## Supporting Information

### **Asperflavipines C–E and Aspermichalasin A: Three Cytochalasan Heterotetramers and an Unusual Cytochalasan Monomer from *Aspergillus micronesiensis***

Xiaotian Zhang,<sup>a,†</sup> Zhaodi Wu,<sup>b,†</sup> Alan Bao,<sup>a</sup> Ziming Zhao,<sup>a</sup> Yu Chen,<sup>a</sup>  
Huimin Zhao,<sup>a</sup> Jianping Wang,<sup>a</sup> Chunmei Chen,<sup>a</sup> Qingyi Tong,<sup>\*,a</sup> Hucheng  
Zhu,<sup>\*,a</sup> Yonghui Zhang<sup>\*,a</sup>

<sup>a</sup>Hubei Key Laboratory of Natural Medicinal Chemistry and Resource Evaluation,  
School of Pharmacy, Tongji Medical College, Huazhong University of Science and  
Technology, Wuhan 430030, China.

<sup>b</sup>The Second Affiliated Hospital of Guangzhou University of Chinese Medicine,  
Guangzhou 510120, China.

#### **\* Corresponding Authors**

E-mails: zhangyh@mails.tjmu.edu.cn (Y. Z.), zhuhucheng@hust.edu.cn (H. Z.),  
qytong@hust.edu.cn (Q.T.)

## Contents of Supporting Information

|                                                                                                                       |    |
|-----------------------------------------------------------------------------------------------------------------------|----|
| Table S1. $^1\text{H}$ (600 MHz) and $^{13}\text{C}$ (150 MHz) NMR data of <b>1</b> and <b>2</b> .....                | 5  |
| Table S2. $^1\text{H}$ (800 MHz) and $^{13}\text{C}$ (200 MHz) NMR data of <b>3</b> .....                             | 6  |
| Table S3. $^1\text{H}$ (400 MHz) and $^{13}\text{C}$ (100 MHz) NMR data of <b>4–8</b> .....                           | 7  |
| Table S4. $\text{IC}_{50}$ ( $\mu\text{M}$ , 48h) values of <b>1–8</b> against leukemia cell lines.....               | 8  |
| Figure S1. Key $^1\text{H}$ – $^1\text{H}$ COSY, HMBC and NOESY correlations of <b>5–8</b> .....                      | 9  |
| Figure S2. Experimental ECD spectra of <b>5–8</b> .....                                                               | 10 |
| Figure S3. $^1\text{H}$ NMR spectrum of compound <b>1</b> (Recorded in $\text{DMSO-}d_6$ ).....                       | 11 |
| Figure S4. Enlarged $^1\text{H}$ NMR spectrum (6.0 ~ 3.6 ppm) of compound <b>1</b> .....                              | 12 |
| Figure S5. Enlarged $^1\text{H}$ NMR spectrum (3.2 ~ 0.8 ppm) of compound <b>1</b> .....                              | 13 |
| Figure S6. $^{13}\text{C}$ NMR spectrum of compound <b>1</b> (Recorded in $\text{DMSO-}d_6$ ).....                    | 14 |
| Figure S7. Enlarged $^{13}\text{C}$ NMR spectrum of compound <b>1</b> .....                                           | 15 |
| Figure S8. HSQC spectrum of compound <b>1</b> (Recorded in $\text{DMSO-}d_6$ ).....                                   | 16 |
| Figure S9. HMBC spectrum of compound <b>1</b> (Recorded in $\text{DMSO-}d_6$ ) .....                                  | 17 |
| Figure S10. $^1\text{H}$ – $^1\text{H}$ COSY spectrum of compound <b>1</b> (Recorded in $\text{DMSO-}d_6$ ) .....     | 18 |
| Figure S11. NOESY spectrum of compound <b>1</b> (Recorded in $\text{DMSO-}d_6$ ) .....                                | 19 |
| Figure S12. HRESIMS spectrum of compound <b>1</b> .....                                                               | 20 |
| Figure S13. UV spectrum of compound <b>1</b> .....                                                                    | 21 |
| Figure S14. IR spectrum of compound <b>1</b> .....                                                                    | 22 |
| Figure S15. $^1\text{H}$ NMR spectrum of compound <b>2</b> (Recorded in $\text{DMSO-}d_6$ ).....                      | 23 |
| Figure S16. Enlarged $^1\text{H}$ NMR spectrum (6.1 ~ 3.6 ppm) of compound <b>2</b> .....                             | 24 |
| Figure S17. Enlarged $^1\text{H}$ NMR spectrum (3.9 ~ 0.7 ppm) of compound <b>2</b> .....                             | 25 |
| Figure S18. $^{13}\text{C}$ NMR spectrum of compound <b>2</b> (Recorded in $\text{DMSO-}d_6$ ).....                   | 26 |
| Figure S19. Enlarged $^{13}\text{C}$ NMR spectrum of compound <b>2</b> .....                                          | 27 |
| Figure S20. HSQC spectrum of compound <b>2</b> (Recorded in $\text{DMSO-}d_6$ ).....                                  | 28 |
| Figure S21. HMBC spectrum of compound <b>2</b> (Recorded in $\text{DMSO-}d_6$ ) .....                                 | 29 |
| Figure S22. $^1\text{H}$ – $^1\text{H}$ COSY spectrum of compound <b>2</b> (Recorded in $\text{DMSO-}d_6$ ) .....     | 30 |
| Figure S23. NOESY spectrum of compound <b>2</b> (Recorded in $\text{DMSO-}d_6$ ).....                                 | 31 |
| Figure S24. HRESIMS spectrum of compound <b>2</b> .....                                                               | 32 |
| Figure S25. UV spectrum of compound <b>2</b> .....                                                                    | 33 |
| Figure S26. IR spectrum of compound <b>2</b> .....                                                                    | 34 |
| Figure S27. $^1\text{H}$ NMR spectrum of compound <b>3</b> (Recorded in $\text{CD}_3\text{OD}$ ) .....                | 35 |
| Figure S28. Enlarged $^1\text{H}$ NMR spectrum (6.2 ~ 3.0 ppm) of compound <b>3</b> .....                             | 36 |
| Figure S29. Enlarged $^1\text{H}$ NMR spectrum (3.0 ~ 0.8 ppm) of compound <b>3</b> .....                             | 37 |
| Figure S30. $^{13}\text{C}$ NMR spectrum of compound <b>3</b> (Recorded in $\text{CD}_3\text{OD}$ ) .....             | 38 |
| Figure S31. Enlarged $^{13}\text{C}$ NMR spectrum of compound <b>3</b> .....                                          | 39 |
| Figure S32. HSQC spectrum of compound <b>3</b> (Recorded in $\text{CD}_3\text{OD}$ ).....                             | 40 |
| Figure S33. HMBC spectrum of compound <b>3</b> (Recorded in $\text{CD}_3\text{OD}$ ).....                             | 41 |
| Figure S34. $^1\text{H}$ – $^1\text{H}$ COSY spectrum of compound <b>3</b> (Recorded in $\text{CD}_3\text{OD}$ )..... | 42 |
| Figure S35. NOESY spectrum of compound <b>3</b> (Recorded in $\text{CD}_3\text{OD}$ ).....                            | 43 |
| Figure S36. HRESIMS spectrum of compound <b>3</b> .....                                                               | 44 |
| Figure S37. UV spectrum of compound <b>3</b> .....                                                                    | 45 |
| Figure S38. IR spectrum of compound <b>3</b> .....                                                                    | 46 |

|                                                                                                                                |    |
|--------------------------------------------------------------------------------------------------------------------------------|----|
| Figure S39. <sup>1</sup> H NMR spectrum of compound <b>4</b> (Recorded in CD <sub>3</sub> OD) .....                            | 47 |
| Figure S40. <sup>13</sup> C NMR spectrum of compound <b>4</b> (Recorded in CD <sub>3</sub> OD) .....                           | 48 |
| Figure S41. HSQC spectrum of compound <b>4</b> (Recorded in CD <sub>3</sub> OD) .....                                          | 49 |
| Figure S42. HMBC spectrum of compound <b>4</b> (Recorded in CD <sub>3</sub> OD).....                                           | 50 |
| Figure S43. <sup>1</sup> H- <sup>1</sup> H COSY spectrum of compound <b>4</b> (Recorded in CD <sub>3</sub> OD).....            | 51 |
| Figure S44. NOESY spectrum of compound <b>4</b> (Recorded in CD <sub>3</sub> OD).....                                          | 52 |
| Figure S45. HRESIMS spectrum of compound <b>4</b> .....                                                                        | 53 |
| Figure S46. UV spectrum of compound <b>4</b> .....                                                                             | 54 |
| Figure S47. IR spectrum of compound <b>4</b> .....                                                                             | 55 |
| Figure S48. <sup>1</sup> H NMR spectrum of compound <b>5</b> (Recorded in CD <sub>3</sub> OD) .....                            | 56 |
| Figure S49. <sup>13</sup> C NMR spectrum of compound <b>5</b> (Recorded in CD <sub>3</sub> OD) .....                           | 57 |
| Figure S50. HSQC spectrum of compound <b>5</b> (Recorded in CD <sub>3</sub> OD).....                                           | 58 |
| Figure S51. HMBC spectrum of compound <b>5</b> (Recorded in CD <sub>3</sub> OD).....                                           | 59 |
| Figure S52. <sup>1</sup> H- <sup>1</sup> H COSY spectrum of compound <b>5</b> (Recorded in CD <sub>3</sub> OD).....            | 60 |
| Figure S53. NOESY spectrum of compound <b>5</b> (Recorded in CD <sub>3</sub> OD).....                                          | 61 |
| Figure S54. HRESIMS spectrum of compound <b>5</b> .....                                                                        | 62 |
| Figure S55. UV spectrum of compound <b>5</b> .....                                                                             | 63 |
| Figure S56. IR spectrum of compound <b>5</b> .....                                                                             | 64 |
| Figure S57. <sup>1</sup> H NMR spectrum of compound <b>6</b> (Recorded in CDCl <sub>3</sub> ) .....                            | 65 |
| Figure S58. <sup>13</sup> C NMR spectrum of compound <b>6</b> (Recorded in CDCl <sub>3</sub> ) .....                           | 66 |
| Figure S59. HSQC spectrum of compound <b>6</b> (Recorded in CDCl <sub>3</sub> ).....                                           | 67 |
| Figure S60. HMBC spectrum of compound <b>6</b> (Recorded in CDCl <sub>3</sub> ).....                                           | 68 |
| Figure S61. <sup>1</sup> H- <sup>1</sup> H COSY spectrum of compound <b>6</b> (Recorded in CDCl <sub>3</sub> ).....            | 69 |
| Figure S62. NOESY spectrum of compound <b>6</b> (Recorded in CDCl <sub>3</sub> ) .....                                         | 70 |
| Figure S63. HRESIMS spectrum of compound <b>6</b> .....                                                                        | 71 |
| Figure S64. UV spectrum of compound <b>6</b> .....                                                                             | 72 |
| Figure S65. IR spectrum of compound <b>6</b> .....                                                                             | 73 |
| Figure S66. <sup>1</sup> H NMR spectrum of compound <b>7</b> (Recorded in DMSO- <i>d</i> <sub>6</sub> ).....                   | 74 |
| Figure S67. <sup>13</sup> C NMR spectrum of compound <b>7</b> (Recorded in DMSO- <i>d</i> <sub>6</sub> ).....                  | 75 |
| Figure S68. HSQC spectrum of compound <b>7</b> (Recorded in DMSO- <i>d</i> <sub>6</sub> ).....                                 | 76 |
| Figure S69. HMBC spectrum of compound <b>7</b> (Recorded in DMSO- <i>d</i> <sub>6</sub> ) .....                                | 77 |
| Figure S70. <sup>1</sup> H- <sup>1</sup> H COSY spectrum of compound <b>7</b> (Recorded in DMSO- <i>d</i> <sub>6</sub> ) ..... | 78 |
| Figure S71. NOESY spectrum of compound <b>7</b> (Recorded in DMSO- <i>d</i> <sub>6</sub> ).....                                | 79 |
| Figure S72. HRESIMS spectrum of compound <b>7</b> .....                                                                        | 80 |
| Figure S73. UV spectrum of compound <b>7</b> .....                                                                             | 81 |
| Figure S74. IR spectrum of compound <b>7</b> .....                                                                             | 82 |
| Figure S75. <sup>1</sup> H NMR spectrum of compound <b>8</b> (Recorded in CD <sub>3</sub> OD) .....                            | 83 |
| Figure S76. <sup>13</sup> C NMR spectrum of compound <b>8</b> (Recorded in CD <sub>3</sub> OD) .....                           | 84 |
| Figure S77. HSQC spectrum of compound <b>8</b> (Recorded in CD <sub>3</sub> OD).....                                           | 85 |
| Figure S78. HMBC spectrum of compound <b>8</b> (Recorded in CD <sub>3</sub> OD).....                                           | 86 |
| Figure S79. <sup>1</sup> H- <sup>1</sup> H COSY spectrum of compound <b>8</b> (Recorded in CD <sub>3</sub> OD).....            | 87 |
| Figure S80. NOESY spectrum of compound <b>8</b> (Recorded in CD <sub>3</sub> OD).....                                          | 88 |
| Figure S81. HRESIMS spectrum of compound <b>8</b> .....                                                                        | 89 |
| Figure S82. UV spectrum of compound <b>8</b> .....                                                                             | 90 |

|                                                      |    |
|------------------------------------------------------|----|
| Figure S83. IR spectrum of compound <b>8</b> .....   | 91 |
| Figure S84. Complete western blotting pictures ..... | 92 |

**Table S1**  $^1\text{H}$  (600 MHz) and  $^{13}\text{C}$  (150 MHz) NMR data of **1** and **2** ( $\delta$  in ppm, DMSO- $d_6$ )

| <b>1</b>   |                               |                     |            |                               |                     | <b>2</b>   |                               |                     |            |                               |                     |
|------------|-------------------------------|---------------------|------------|-------------------------------|---------------------|------------|-------------------------------|---------------------|------------|-------------------------------|---------------------|
| <i>no.</i> | $\delta_{\text{H}}$ (J in Hz) | $\delta_{\text{C}}$ | <i>no.</i> | $\delta_{\text{H}}$ (J in Hz) | $\delta_{\text{C}}$ | <i>no.</i> | $\delta_{\text{H}}$ (J in Hz) | $\delta_{\text{C}}$ | <i>no.</i> | $\delta_{\text{H}}$ (J in Hz) | $\delta_{\text{C}}$ |
| 1          |                               | 174.6               | 1'         |                               | 174.0               | 1          |                               | 174.6               | 1'         |                               | 172.7               |
| 3          | 3.08 m                        | 50.0                | 3'         | 2.89 m                        | 51.4                | 3          | 3.08 m                        | 49.8                | 3'         | 3.12 m                        | 49.3                |
| 4          | 2.35 m                        | 53.5                | 4'         | 2.12 m                        | 54.8                | 4          | 2.29 m                        | 53.6                | 4'         | 2.41 m                        | 53.1                |
| 5          | 2.45 m                        | 35.0                | 5'         | 2.47 m                        | 35.8                | 5          | 2.45 m                        | 34.9                | 5'         | 2.44 m                        | 34.5                |
| 6          |                               | 139.2               | 6'         |                               | 138.7               | 6          |                               | 139.3               | 6'         |                               | 138.6               |
| 7          | 5.23 brs                      | 125.2               | 7'         | 5.40 brs                      | 125.8               | 7          | 5.24 brs                      | 125.1               | 7'         | 5.15 brs                      | 125.6               |
| 8          | 3.06 m                        | 44.1                | 8'         | 3.37 m                        | 42.7                | 8          | 3.06 m                        | 44.1                | 8'         | 2.90 brd (10.8)               | 43.4                |
| 9          |                               | 68.7                | 9'         |                               | 67.4                | 9          |                               | 68.7                | 9'         |                               | 68.6                |
| 10a        | 1.06 m                        | 50.2                | 10'a       | 1.20 m                        | 49.2                | 10a        | 1.04 m                        | 50.4                | 10'a       | 1.12 m                        | 49.7                |
| 10b        | 1.06 m                        |                     | 10'b       | 1.07 m                        |                     | 10b        | 1.04 m                        |                     | 10'b       | 0.94 m                        |                     |
| 11         | 1.14 d (7.0)                  | 13.1                | 11'        | 1.14 d (7.0)                  | 13.6                | 11         | 1.14 d (7.0)                  | 13.1                | 11'        | 1.14 d (7.0)                  | 13.2                |
| 12         | 1.69 s                        | 19.5                | 12'        | 1.72 s                        | 20.0                | 12         | 1.69 s                        | 19.5                | 12'        | 1.66 s                        | 19.4                |
| 13         | 6.00 d (10.7)                 | 124.7               | 13'        | 5.88 d (10.9)                 | 124.2               | 13         | 6.03 d (10.7)                 | 124.6               | 13'        | 5.84 d (10.8)                 | 123.6               |
| 14         |                               | 135.2               | 14'        |                               | 135.4               | 14         |                               | 135.2               | 14'        |                               | 135.8               |
| 15a        | 2.06 m                        | 34.3                | 15'a       | 1.92 m                        | 36.0                | 15a        | 2.05 m                        | 34.3                | 15'a       | 2.08 m                        | 31.5                |
| 15b        | 1.84 m                        |                     | 15'b       | 1.81 m                        |                     | 15b        | 1.84 m                        |                     | 15'b       | 1.78 m                        |                     |
| 16a        | 1.84 m                        | 28.4                | 16'a       | 1.13 m                        | 29.6                | 16a        | 1.84 m                        | 28.4                | 16'a       | 1.95 m                        | 30.9                |
| 16b        | 1.31 m                        |                     | 16'b       | 1.13 m                        |                     | 16b        | 1.32 m                        |                     | 16'b       | 1.73 m                        |                     |
| 17         | 3.69 m                        | 73.4                | 17'        | 3.72 m                        | 69.9                | 17         | 3.68 m                        | 73.3                | 17'        | 3.79 m                        | 76.5                |
| 18         | 5.21 m                        | 74.8                | 18'        | 2.60 dd (11.7, 4.3)           | 76.2                | 18         | 4.48 s                        | 75.9                | 18'        |                               | 205.5               |
| 19         | 1.90 m                        | 41.8                | 19'        | 2.12 m                        | 53.1                | 19         | 1.90 t (5.4)                  | 41.6                | 19'        | 3.35 dd (6.4, 5.0)            | 58.7                |
| 20         | 3.78 d (4.8)                  | 50.2                | 20'        | 4.07 d (5.6)                  | 47.2                | 20         | 3.79 d (5.4)                  | 50.1                | 20'        | 4.63 d (6.4)                  | 46.7                |
| 21         |                               | 214.0               | 21'        |                               | 213.6               | 21         |                               | 214.6               | 21'        |                               | 215.2               |
| 22         | 1.62 m                        | 23.9                | 22'        | 1.70 m                        | 24.6                | 22         | 1.60 m                        | 23.8                | 22'        | 1.57 m                        | 24.0                |
| 23         | 0.83 d (6.5)                  | 23.6                | 23'        | 0.97 d (6.5)                  | 23.8                | 23         | 0.84 d (6.5)                  | 23.6                | 23'        | 0.88 d (6.5)                  | 23.6                |
| 24         | 0.85 d (6.5)                  | 21.3                | 24'        | 0.88 d (6.5)                  | 21.9                | 24         | 0.85 d (6.5)                  | 21.3                | 24'        | 0.85 d (6.5)                  | 21.9                |
| 25         | 1.38 s                        | 15.0                | 25'        | 1.38 s                        | 16.0                | 25         | 1.39 s                        | 15.0                | 25'        | 1.39 s                        | 16.5                |
| 1''        | 4.55 m                        | 75.9                | 1'''       | 4.54 m                        | 81.8                | 1''        | 5.23 d (5.4)                  | 74.7                | 1'''       | 4.59 s                        | 81.9                |
| 2''        |                               | 51.1                | 2'''       |                               | 72.0                | 2''        |                               | 51.4                | 2'''       |                               | 71.8                |
| 3''        |                               | 91.9                | 3'''       |                               | 192.8               | 3''        |                               | 92.0                | 3'''       |                               | 191.8               |
| 4''        |                               | 186.2               | 4'''       |                               | 91.2                | 4''        |                               | 186.6               | 4'''       |                               | 91.1                |
| 5''        |                               | 147.6               | 5'''       |                               | 194.1               | 5''        |                               | 147.4               | 5'''       |                               | 193.9               |
| 6''        |                               | 121.6               | 6'''       |                               | 131.7               | 6''        |                               | 121.7               | 6'''       |                               | 130.9               |
| 7''        |                               | 66.3                | 7'''       |                               | 160.7               | 7''        |                               | 65.2                | 7'''       |                               | 159.0               |
| 8''        | 4.53 s                        | 83.4                | 8'''       | 5.09 d (5.0)                  | 80.1                | 8''        | 4.50 s                        | 83.1                | 8'''       | 5.34 d (5.0)                  | 79.6                |
| 9''        | 1.60 s                        | 16.8                | 9'''       | 1.66 s                        | 12.5                | 9''        | 1.60 s                        | 16.9                | 9'''       | 1.39 s                        | 11.6                |

**Table S2**  $^1\text{H}$  (800 MHz) and  $^{13}\text{C}$  (200 MHz) NMR data of **3** ( $\delta$  in ppm,  $\text{CD}_3\text{OD}$ ).

| <b>3</b>   |                                       |                     |            |                                       |                     |
|------------|---------------------------------------|---------------------|------------|---------------------------------------|---------------------|
| <i>no.</i> | $\delta_{\text{H}}$ ( <i>J</i> in Hz) | $\delta_{\text{C}}$ | <i>no.</i> | $\delta_{\text{H}}$ ( <i>J</i> in Hz) | $\delta_{\text{C}}$ |
| 1          |                                       | 177.1               | 1'         |                                       | 176.2               |
| 3          | 3.10 m                                | 52.8                | 3'         | 3.17 m                                | 52.8                |
| 4          | 2.47 dd (5.2, 3.5)                    | 56.3                | 4'         | 2.51 dd (5.3, 3.3)                    | 55.5                |
| 5          | 2.61 m                                | 36.9                | 5'         | 2.63 m                                | 37.3                |
| 6          |                                       | 141.6               | 6'         |                                       | 141.1               |
| 7          | 5.30 brs                              | 126.7               | 7'         | 5.40 brs                              | 126.9               |
| 8          | 3.23 m                                | 45.6                | 8'         | 3.25 m                                | 45.9                |
| 9          |                                       | 71.3                | 9'         |                                       | 68.4                |
| 10a        | 1.20 m                                | 51.5                | 10'a       | 1.35 m                                | 50.7                |
| 10b        | 1.20 m                                |                     | 10'b       | 1.35 m                                |                     |
| 11         | 1.23 d (7.2)                          | 14.0                | 11'        | 1.28 d (7.3)                          | 14.2                |
| 12         | 1.77 s                                | 20.1                | 12'        | 1.79 s                                | 20.1                |
| 13         | 6.14 d (10.9)                         | 126.5               | 13'        | 6.05 d (11.1)                         | 125.5               |
| 14         |                                       | 138.0               | 14'        |                                       | 138.4               |
| 15a        | 2.17 dd (13.9, 8.9)                   | 40.0                | 15'a       | 2.55 m                                | 33.2                |
| 15b        | 2.10 dd (13.9, 11.0)                  |                     | 15'b       | 1.99 m                                |                     |
| 16a        | 1.68 m                                | 22.3                | 16'a       | 1.33 m                                | 30.8                |
| 16b        | 1.61 m                                |                     | 16'b       | 1.29 m                                |                     |
| 17a        | 2.23 m                                | 36.8                | 17'        |                                       | 212.4               |
| 17b        | 1.88 m                                |                     |            |                                       |                     |
| 18         | 5.18 m                                | 73.4                | 18'        | 3.04 d (10.9)                         | 78.3                |
| 19         | 2.33 t (5.8)                          | 46.2                | 19'        | 2.84 dt (10.9, 5.0)                   | 50.0                |
| 20         | 3.79 d (5.8)                          | 51.8                | 20'        | 4.66 d (5.0)                          | 49.0                |
| 21         |                                       | 216.7               | 21'        |                                       | 212.0               |
| 22         | 1.65 m                                | 26.0                | 22'        | 1.76 m                                | 26.4                |
| 23         | 0.90 d (6.6)                          | 24.6                | 23'        | 1.09 d (6.6)                          | 24.0                |
| 24         | 0.92 d (6.6)                          | 21.3                | 24'        | 0.99 d (6.6)                          | 23.5                |
| 25         | 1.52 s                                | 15.4                | 25'        | 1.51 s                                | 17.2                |
| 1''        | 5.17 d (5.8)                          | 75.5                | 1'''       | 4.86 s                                | 82.54               |
| 2''        |                                       | 52.7                | 2'''       |                                       | 72.9                |
| 3''        |                                       | 92.8                | 3'''       |                                       | 194.4               |
| 4''        |                                       | 188.7               | 4'''       |                                       | 94.4                |
| 5''        |                                       | 149.5               | 5'''       |                                       | 195.6               |
| 6''        |                                       | 122.4               | 6'''       |                                       | 134.1               |
| 7''        |                                       | 68.1                | 7'''       |                                       | 162.0               |
| 8''        | 4.82 s                                | 85.8                | 8'''       | 5.37 d (5.0)                          | 82.47               |
| 9''        | 1.66 s                                | 16.9                | 9'''       | 1.73 s                                | 12.9                |

**Table S3**  $^1\text{H}$  (400 MHz) and  $^{13}\text{C}$  (100 MHz) NMR data of **4–8** ( $\delta$  in ppm).

| <b>4<sup>a</sup></b> |                                       |                     | <b>5<sup>a</sup></b> |                                       |                     | <b>6<sup>b</sup></b>                  |                     |            | <b>7<sup>c</sup></b>                  |                     |                                       | <b>8<sup>a</sup></b> |  |  |
|----------------------|---------------------------------------|---------------------|----------------------|---------------------------------------|---------------------|---------------------------------------|---------------------|------------|---------------------------------------|---------------------|---------------------------------------|----------------------|--|--|
| <i>no.</i>           | $\delta_{\text{H}}$ ( <i>J</i> in Hz) | $\delta_{\text{C}}$ | <i>no.</i>           | $\delta_{\text{H}}$ ( <i>J</i> in Hz) | $\delta_{\text{C}}$ | $\delta_{\text{H}}$ ( <i>J</i> in Hz) | $\delta_{\text{C}}$ | <i>no.</i> | $\delta_{\text{H}}$ ( <i>J</i> in Hz) | $\delta_{\text{C}}$ | $\delta_{\text{H}}$ ( <i>J</i> in Hz) | $\delta_{\text{C}}$  |  |  |
| 1                    |                                       | 175.9               | 1                    |                                       | 177.7               |                                       | 176.5               | 1          |                                       | 174.5               |                                       | 177.3                |  |  |
| 3                    | 3.41 m                                | 52.0                | 3                    | 3.25 m                                | 52.3                | 3.14 m                                | 51.3                | 3          | 3.06 m                                | 49.9                | 3.26 ddd (8.7, 6.1, 2.0)              | 52.0                 |  |  |
| 4                    | 2.43 m                                | 49.3                | 4                    | 2.51 dd (6.0, 1.6)                    | 54.5                | 2.35 dd (5.9, 2.7)                    | 54.9                | 4          | 2.40 dd (6.2, 1.9)                    | 51.9                | 2.65 dd (6.1, 1.8)                    | 53.1                 |  |  |
| 5                    | 2.42 m                                | 37.2                | 5                    | 2.59 m                                | 36.6                | 2.62 m                                | 35.5                | 5          | 2.45 m                                | 35.0                | 2.56 m                                | 36.5                 |  |  |
| 6                    |                                       | 142.6               | 6                    |                                       | 140.9               |                                       | 139.3               | 6          |                                       | 139.2               |                                       | 141.1                |  |  |
| 7                    | 5.79 s                                | 123.5               | 7                    | 5.41 brs                              | 126.7               | 5.39 brs                              | 126.2               | 7          | 5.33 brs                              | 125.4               | 5.39 brs                              | 126.7                |  |  |
| 8                    | 2.26 m                                | 46.2                | 8                    | 3.29 m                                | 44.6                | 3.35 m                                | 43.4                | 8          | 3.08 m                                | 43.2                | 3.18 m                                | 44.8                 |  |  |
| 9                    |                                       | 67.6                | 9                    |                                       | 69.3                |                                       | 68.3                | 9          |                                       | 66.9                |                                       | 69.1                 |  |  |
| 10a                  | 1.54 m                                | 49.4                | 10a                  | 1.19m                                 | 50.0                | 1.20 m                                | 49.2                | 10a        | 1.07 m                                | 48.7                | 1.18 m                                | 49.8                 |  |  |
| 10b                  | 1.43 m                                |                     | 10b                  | 1.13m                                 |                     | 1.13 m                                |                     | 10b        | 1.01 m                                |                     | 1.13 m                                |                      |  |  |
| 11                   | 1.24 d (6.5)                          | 14.0                | 11                   | 1.25 d (7.2)                          | 13.8                | 1.17 d (7.1)                          | 13.6                | 11         | 1.16 d (7.0)                          | 13.1                | 1.26 d (7.2)                          | 13.8                 |  |  |
| 12                   | 1.79 s                                | 20.0                | 12                   | 1.78 s                                | 19.8                | 1.73 s                                | 20.0                | 12         | 1.70 s                                | 19.6                | 1.78 d (1.2)                          | 19.8                 |  |  |
| 13                   | 4.59 d                                | 48.6                | 13                   | 6.03 d (11.1)                         | 125.5               | 6.12 d (11.0)                         | 125.7               | 13         | 6.04 d (10.8)                         | 124.4               | 6.13 d (10.8)                         | 125.7                |  |  |
| 14                   |                                       | 152.6               | 14                   |                                       | 138.0               |                                       | 137.6               | 14         |                                       | 135.2               |                                       | 137.8                |  |  |
| 15a                  | 2.29 m                                | 27.2                | 15a                  | 2.09 m                                | 38.9                | 2.54 t (12.6)                         | 33.4                | 15a        | 1.99 dd (11.9, 4.8)                   | 39.5                | 2.12 dd (12.2, 3.8)                   | 41.1                 |  |  |
| 15b                  | 1.82 m                                |                     | 15b                  | 2.09 m                                |                     | 1.94 dd (12.6, 7.5)                   |                     | 15b        | 1.78 d (12.3)                         |                     | 1.95 m                                |                      |  |  |
| 16a                  | 2.20 m                                | 40.4                | 16a                  | 1.56 m                                | 30.2                | 1.83 m                                | 27.8                | 16a        | 1.46 m                                | 19.0                | 1.61 m                                | 19.9                 |  |  |
| 16b                  | 1.64 m                                |                     | 16b                  | 1.31 m                                |                     | 1.66 m                                |                     | 16b        | 1.27 m                                |                     | 1.52 m                                |                      |  |  |
| 17                   | 3.63 m                                | 71.1                | 17                   | 3.86 m                                | 71.3                | 3.74 m                                | 71.5                | 17a        | 1.69 m                                | 29.1                | 1.87 m                                | 30.8                 |  |  |
| 18a                  | 2.75 m                                | 36.1                | 18                   | 3.55 m                                | 80.1                | 4.51 m                                | 73.3                | 17b        | 1.35 m                                |                     | 1.47 m                                |                      |  |  |
| 18b                  | 2.34 m                                |                     | 19                   | 3.18 d (9.2)                          | 77.9                | 3.19 d (9.0)                          | 78.4                | 18         | 3.40 m                                | 72.3                | 3.48 m                                | 74.3                 |  |  |
| 19                   | 6.81 ddd (10.6, 7.8, 3.0)             | 135.1               | 20a                  | 3.95 d (18.0)                         | 44.3                | 3.61dd (12.7, 9.0)                    | 41.8                | 19         | 3.00 ddd (8.6, 4.1, 3.2)              | 78.5                | 3.56 m                                | 69.9                 |  |  |
| 20                   |                                       | 143.5               | 20b                  | 2.00 d (18.0, 4.0)                    |                     | 2.17 d (12.7)                         |                     | 20a        | 3.82 dd (18.2, 3.2)                   | 43.2                | 4.00 dd (18.1, 2.8)                   | 46.0                 |  |  |
| 21                   |                                       | 202.1               | 21                   |                                       | 212.9               |                                       | 213.6               | 20b        | 1.90 dd (18.2, 4.5)                   |                     | 1.96 m                                |                      |  |  |
| 22                   | 1.67 m                                | 25.5                | 22                   | 1.60 m                                | 25.8                | 1.59 m                                | 25.0                | 21         |                                       | 211.4               |                                       | 212.5                |  |  |
| 23                   | 0.96 d (6.5)                          | 23.6                | 23                   | 0.92 d (6.6)                          | 23.8                | 0.90 d (6.6)                          | 23.7                | 22         | 1.57 m                                | 24.0                | 1.60 m                                | 25.7                 |  |  |
| 24                   | 0.97 d (6.5)                          | 22.7                | 24                   | 0.91 d (6.6)                          | 22.2                | 0.90 d (6.6)                          | 21.6                | 23         | 0.83 d (6.5)                          | 23.5                | 0.91 d (6.6)                          | 23.8                 |  |  |
| 25a                  | 5.19 s                                | 115.1               | 25                   | 1.50 s                                | 16.1                | 1.52 s                                | 15.6                | 24         | 0.83 d (6.5)                          | 21.7                | 0.91 d (6.6)                          | 22.2                 |  |  |
| 25b                  | 5.08 s                                |                     | 1'a                  | 3.75 dq (9.2, 7.0)                    | 66.6                | 3.36 s                                | 57.2                | 25         | 1.42 s                                | 15.6                | 1.50 d (0.9)                          | 15.9                 |  |  |
|                      |                                       |                     | 1'b                  | 3.64 m                                |                     |                                       |                     | 1'         | 3.33 s                                | 57.6                |                                       |                      |  |  |
|                      |                                       |                     | 2'                   | 1.19 t (7.0)                          | 15.7                |                                       |                     |            |                                       |                     |                                       |                      |  |  |

<sup>a</sup> in  $\text{CD}_3\text{OD}$ ; <sup>b</sup> in  $\text{CDCl}_3$ ; <sup>c</sup> in  $\text{DMSO}-d_6$ .

**Table S4.** IC<sub>50</sub> ( $\mu$ M, 48h) values of **1–8** against leukemia cell lines.

| Compounds              | HL60  | A549  | Hep3B | SW480 |
|------------------------|-------|-------|-------|-------|
| <b>1</b>               | 16.51 | 34.72 | 33.35 | 26.65 |
| <b>2</b>               | 9.39  | 20.14 | 17.33 | 23.62 |
| <b>3</b>               | 5.67  | 16.29 | 7.99  | 12.39 |
| <b>4</b>               | >40   | >40   | >40   | >40   |
| <b>5</b>               | 14.93 | 39.77 | 5.60  | > 40  |
| <b>6</b>               | 18.75 | >40   | >40   | 24.03 |
| <b>7</b>               | 13.95 | >40   | >40   | 15.56 |
| <b>8</b>               | 17.50 | >40   | 10.29 | 17.38 |
| <b>DDP<sup>a</sup></b> | 2.15  | 7.24  | 17.58 | 14.34 |

<sup>a</sup>DDP was selected as the positive control.



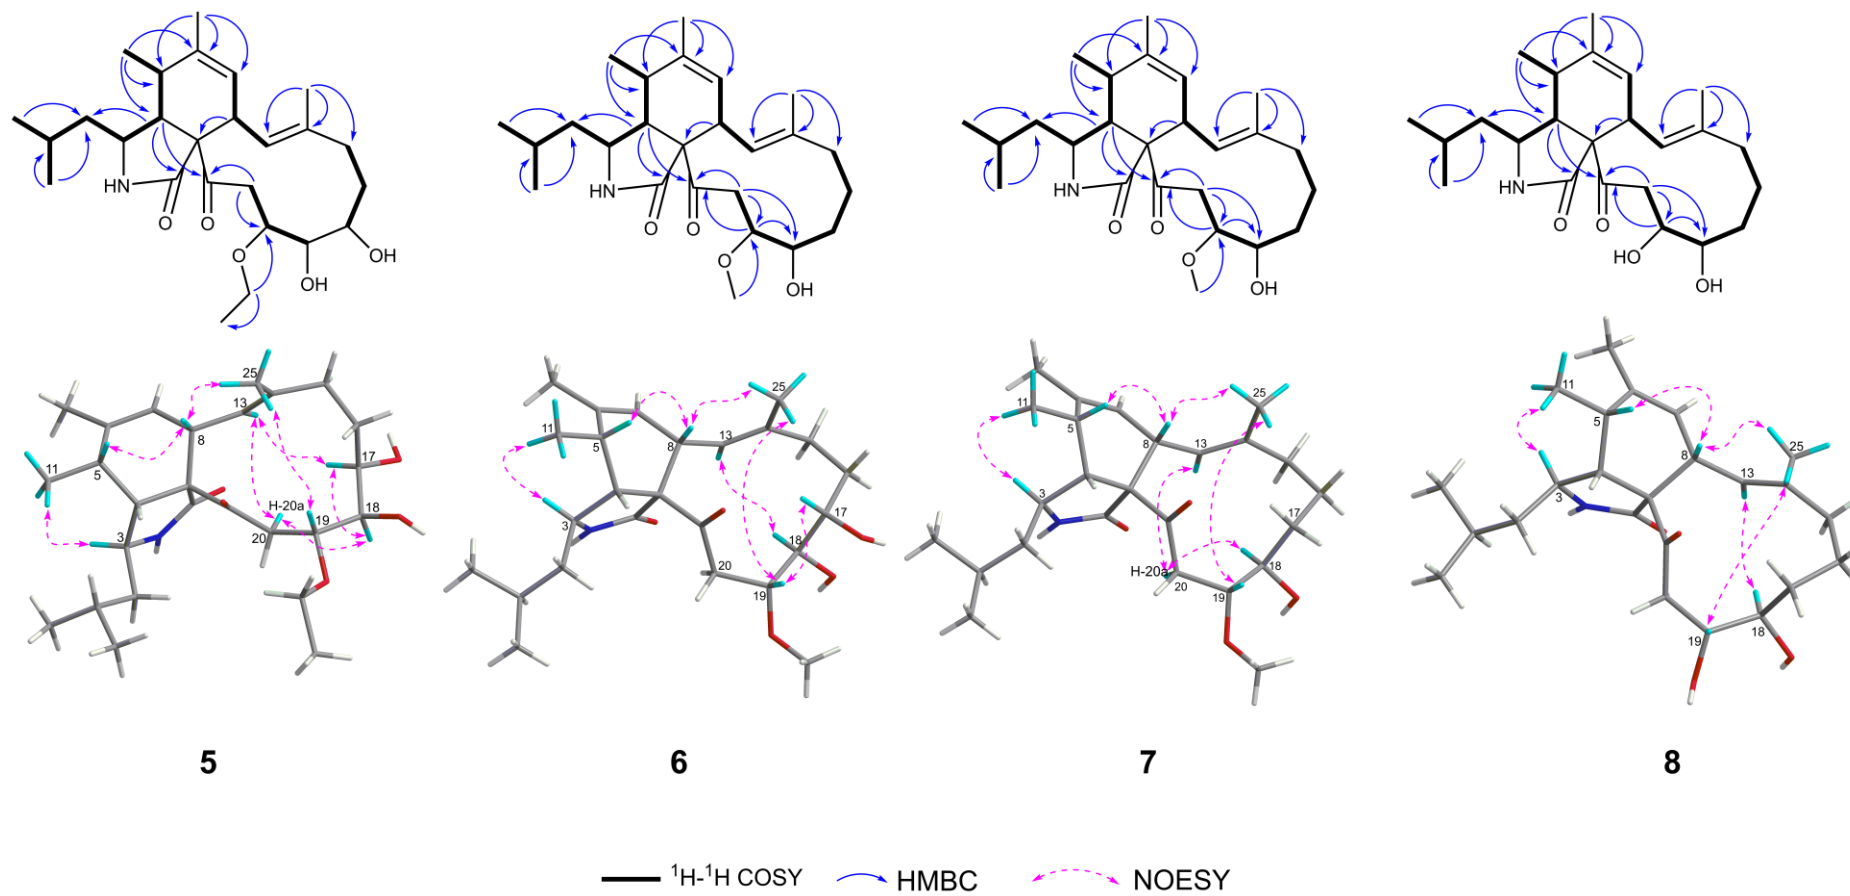

**Figure S1.** Key  $^1\text{H}$ - $^1\text{H}$  COSY, HMBC, and NOESY correlations of **5–8**.

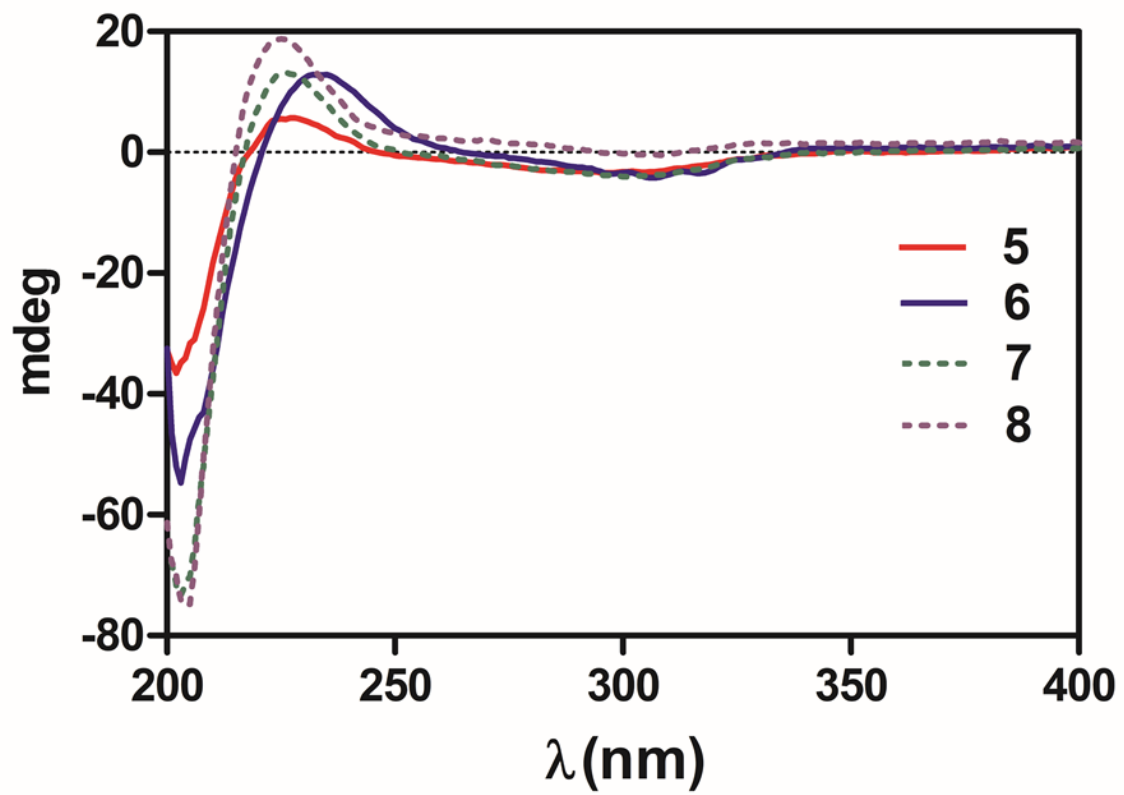

**Figure S2.** Experimental ECD spectra of 5–8.

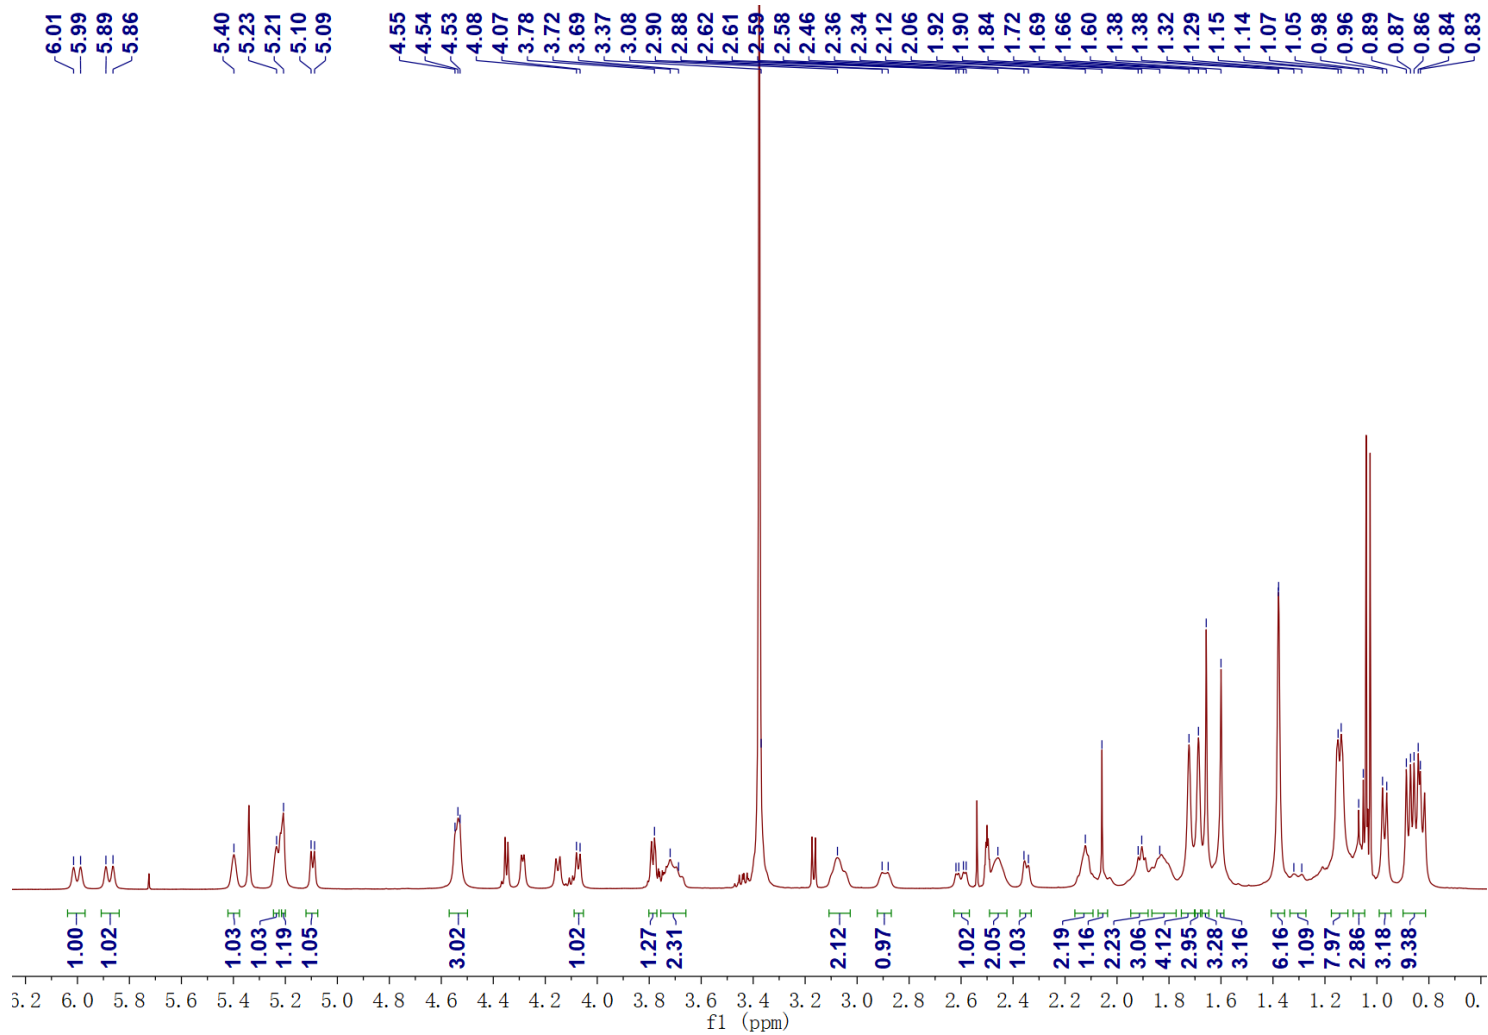

Figure S3.  $^1\text{H}$  NMR of compound 1 (in  $\text{DMSO-}d_6$ )

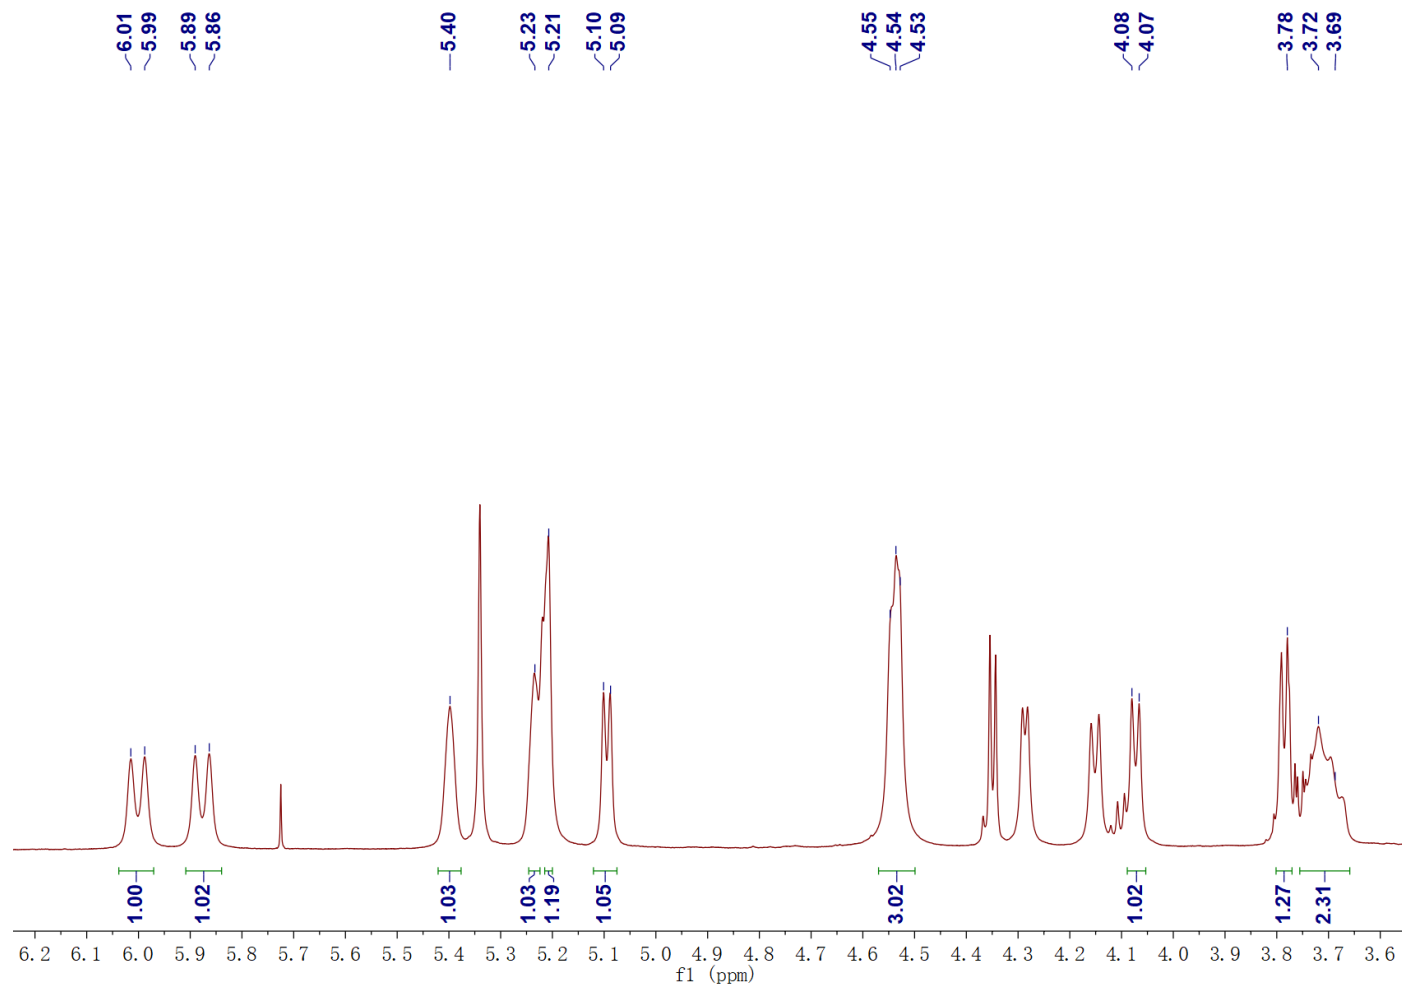

**Figure S4.** Enlarged  $^1\text{H}$  NMR spectrum (6.0 ~ 3.6 ppm) of compound **1**

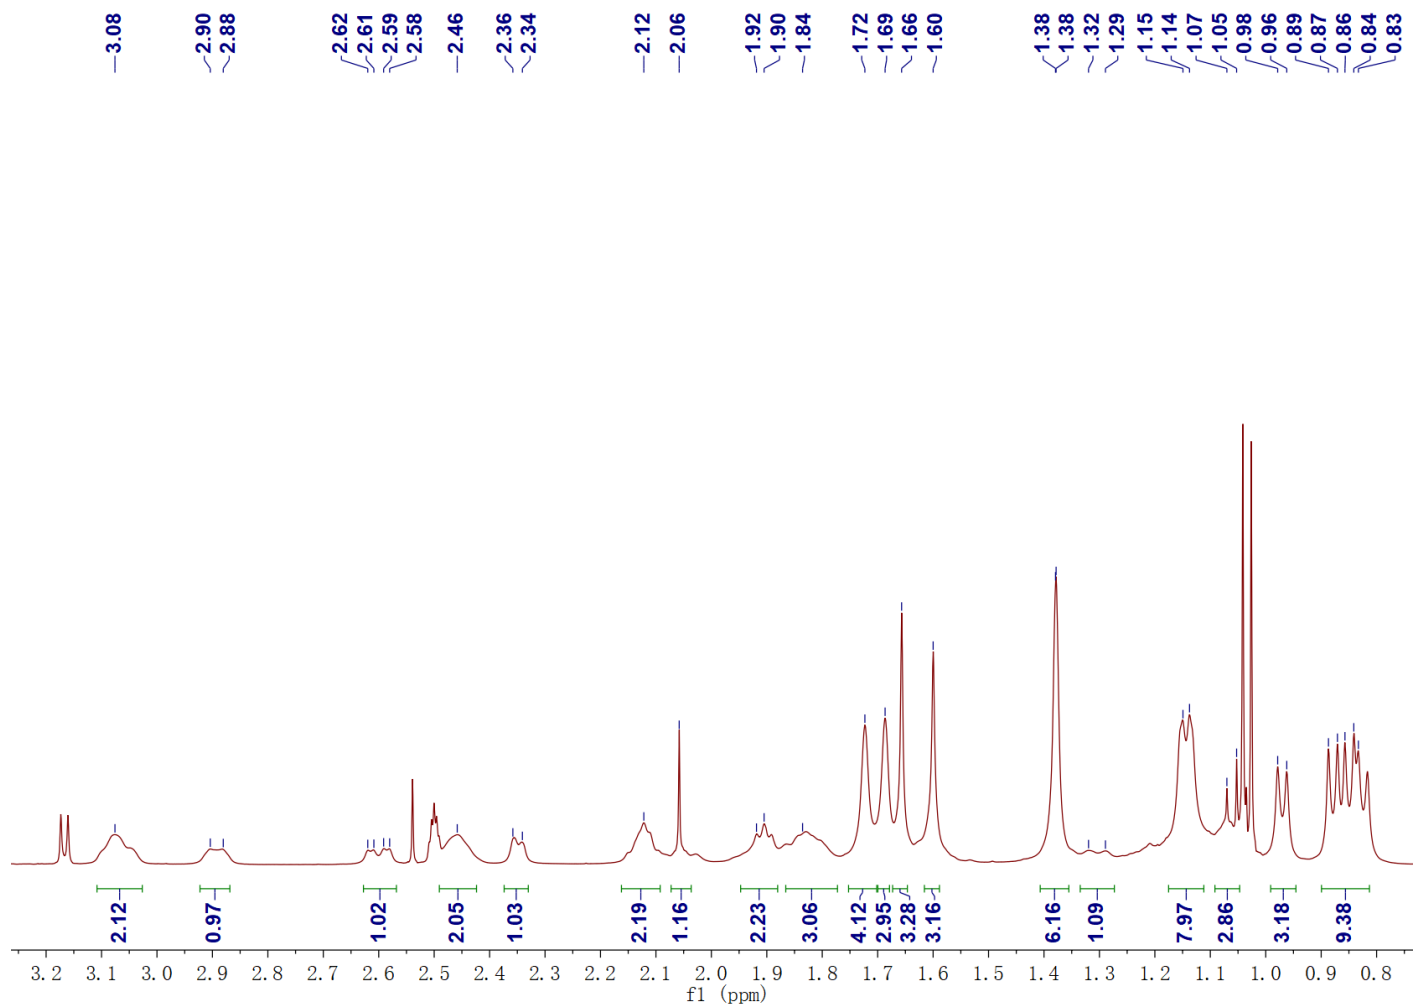

**Figure S5.** Enlarged  $^1\text{H}$  NMR spectrum (3.2 ~ 0.8 ppm) of compound **1**

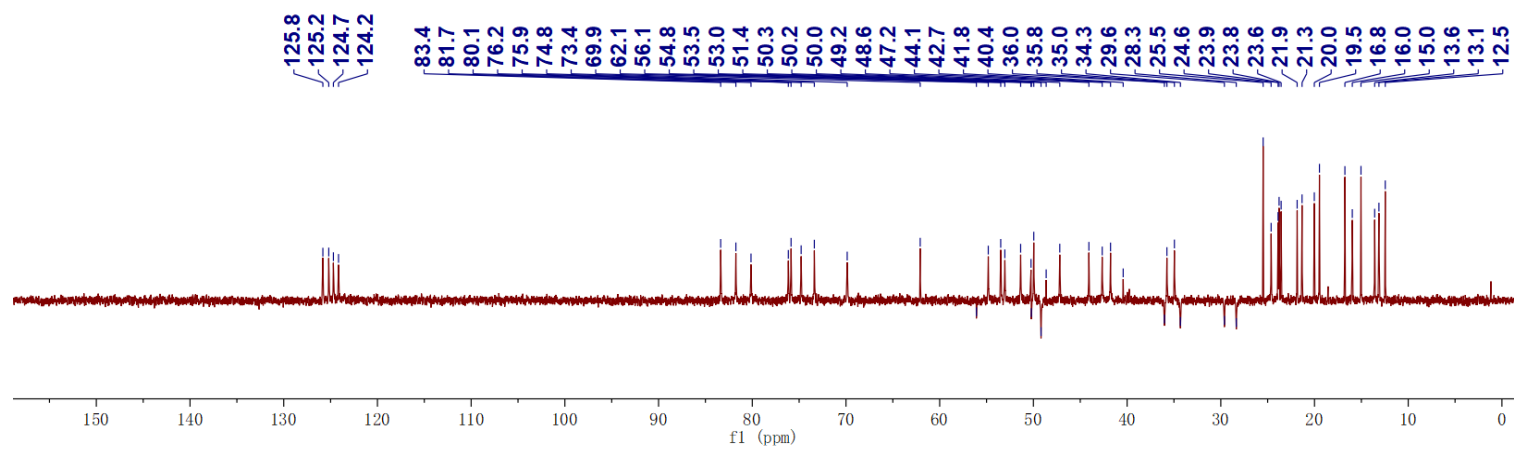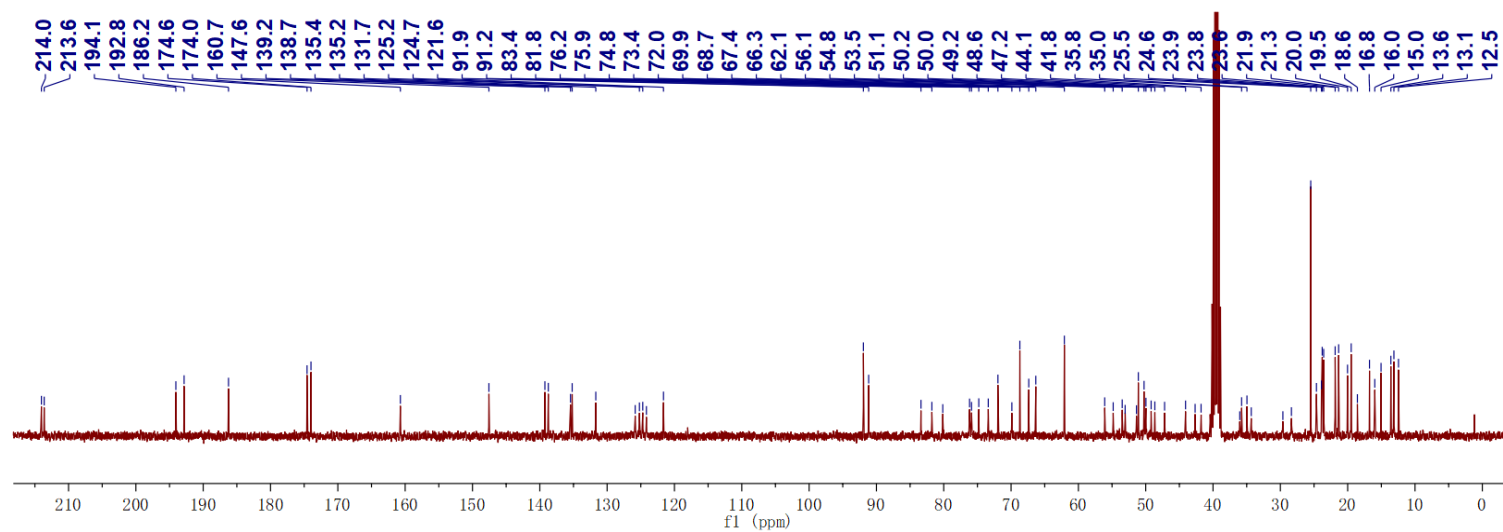

Figure S6. <sup>13</sup>C NMR of compound 1 (in DMSO-*d*<sub>6</sub>)

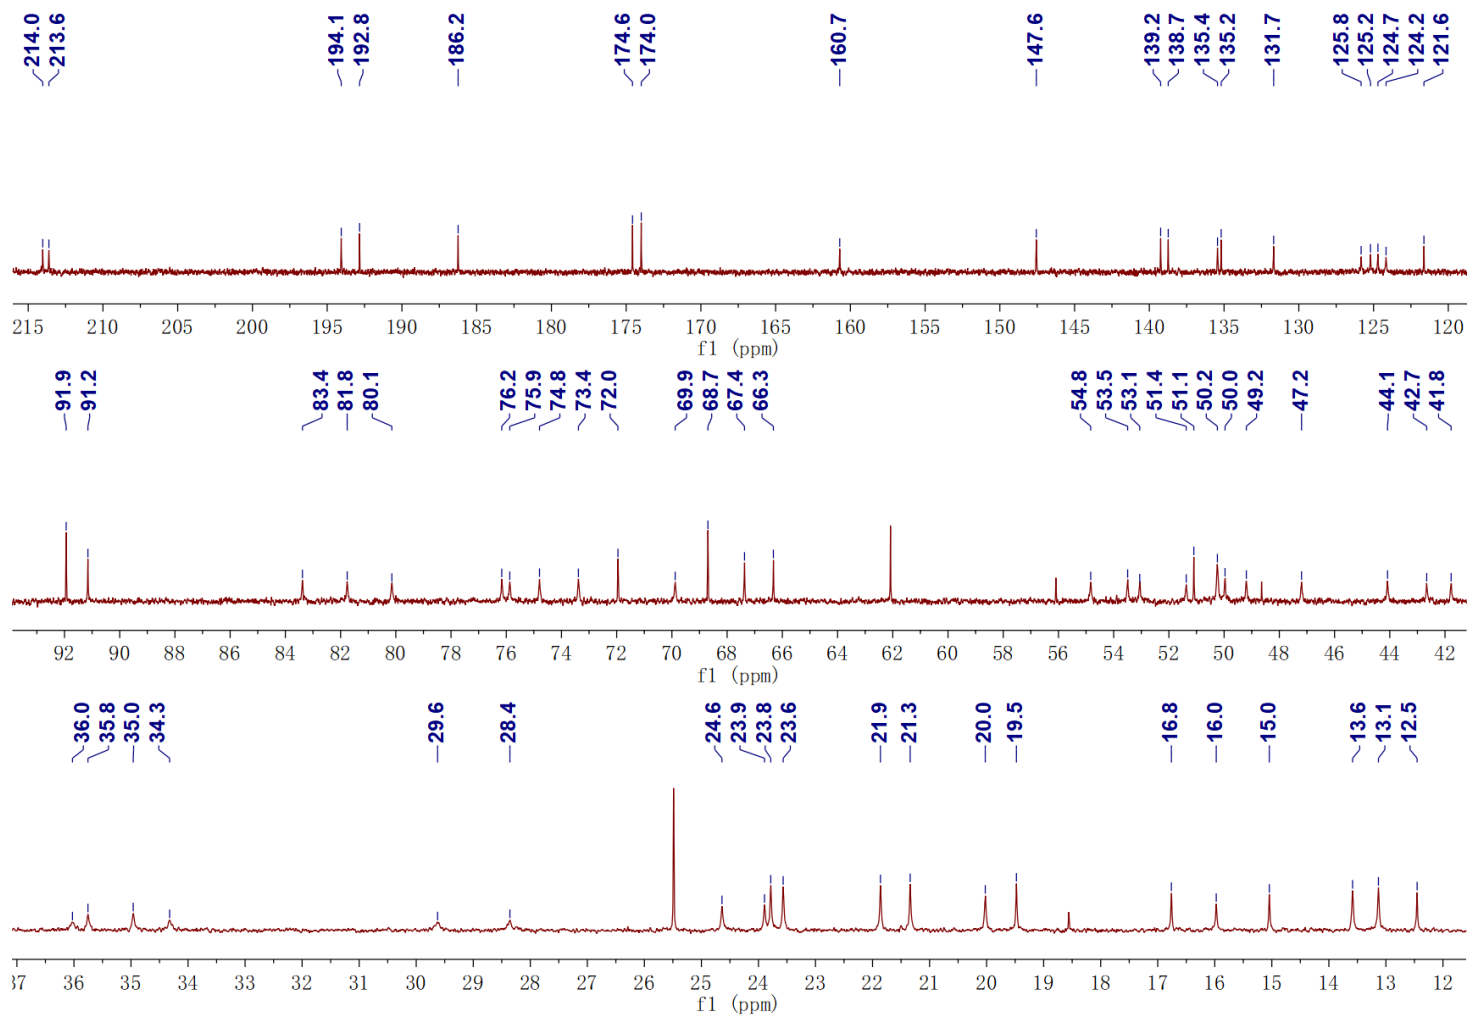

**Figure S7.** Enlarged  $^{13}\text{C}$  NMR spectrum of compound **1**

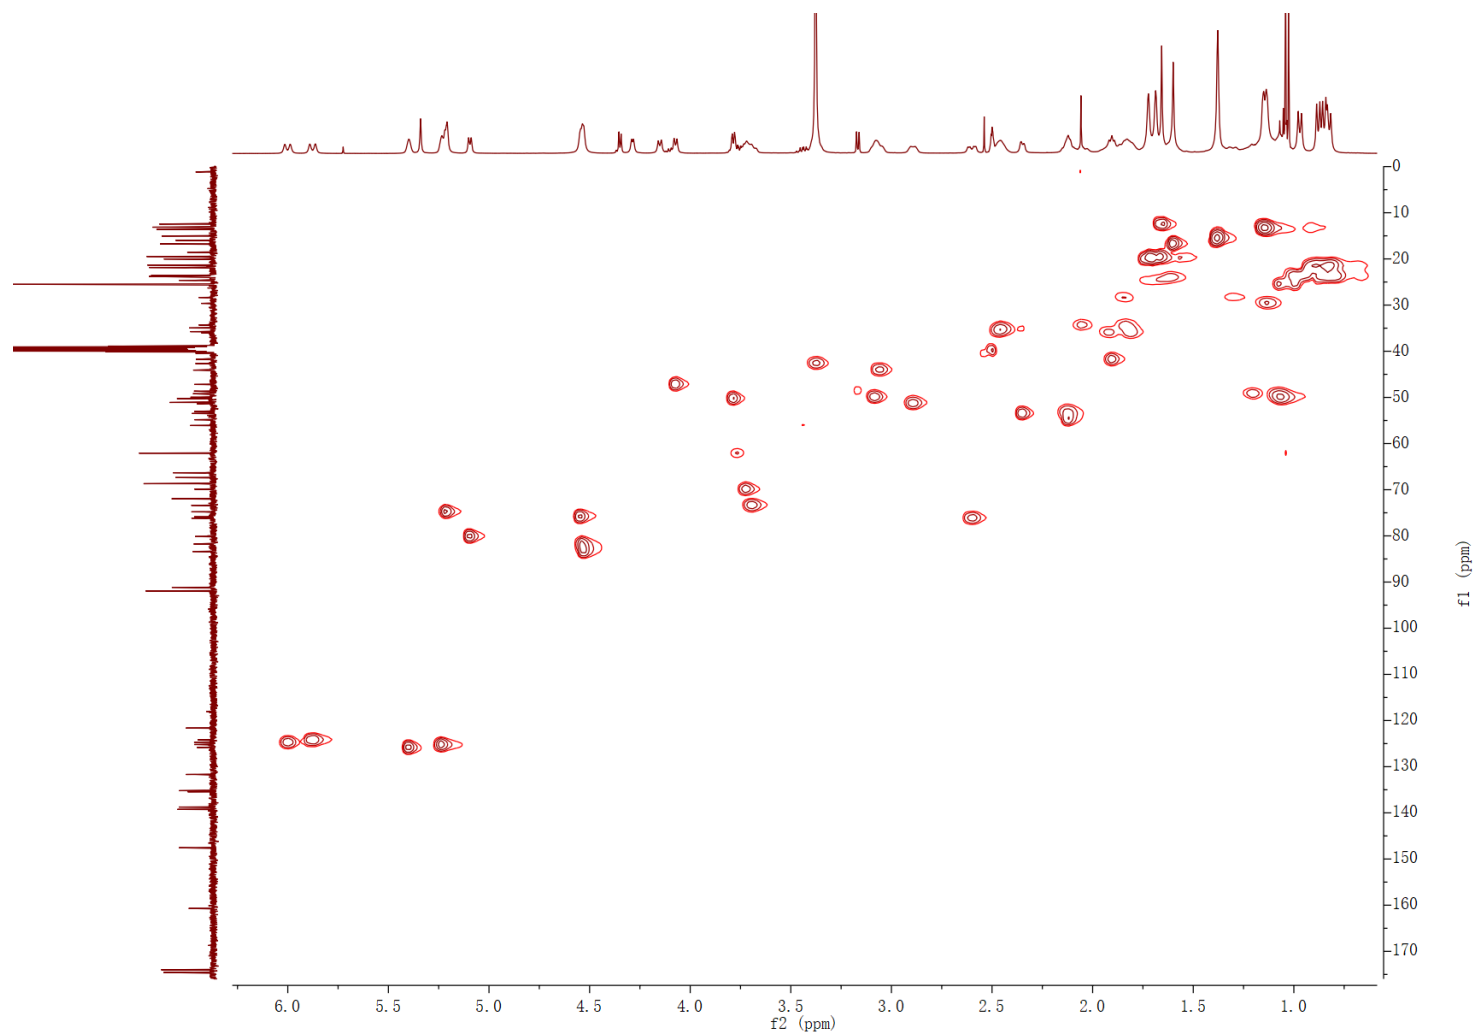

**Figure S8.** HSQC of compound **1** (in DMSO- $d_6$ )



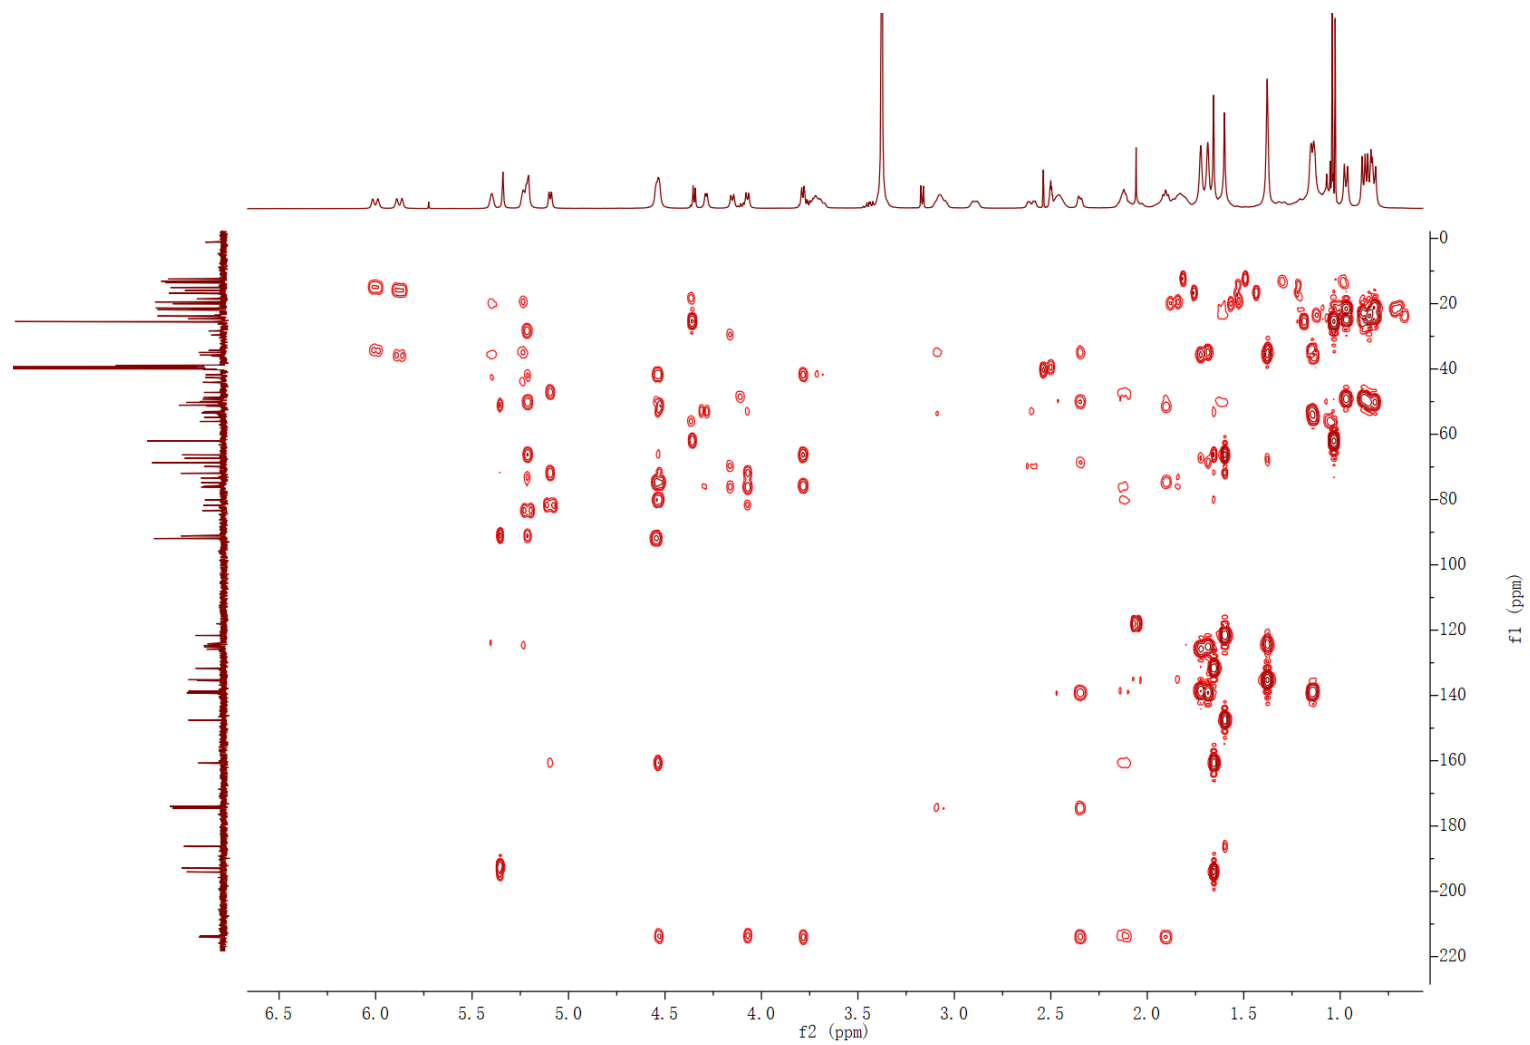

**Figure S9.** HMBC of compound **1** (in DMSO-*d*<sub>6</sub>)

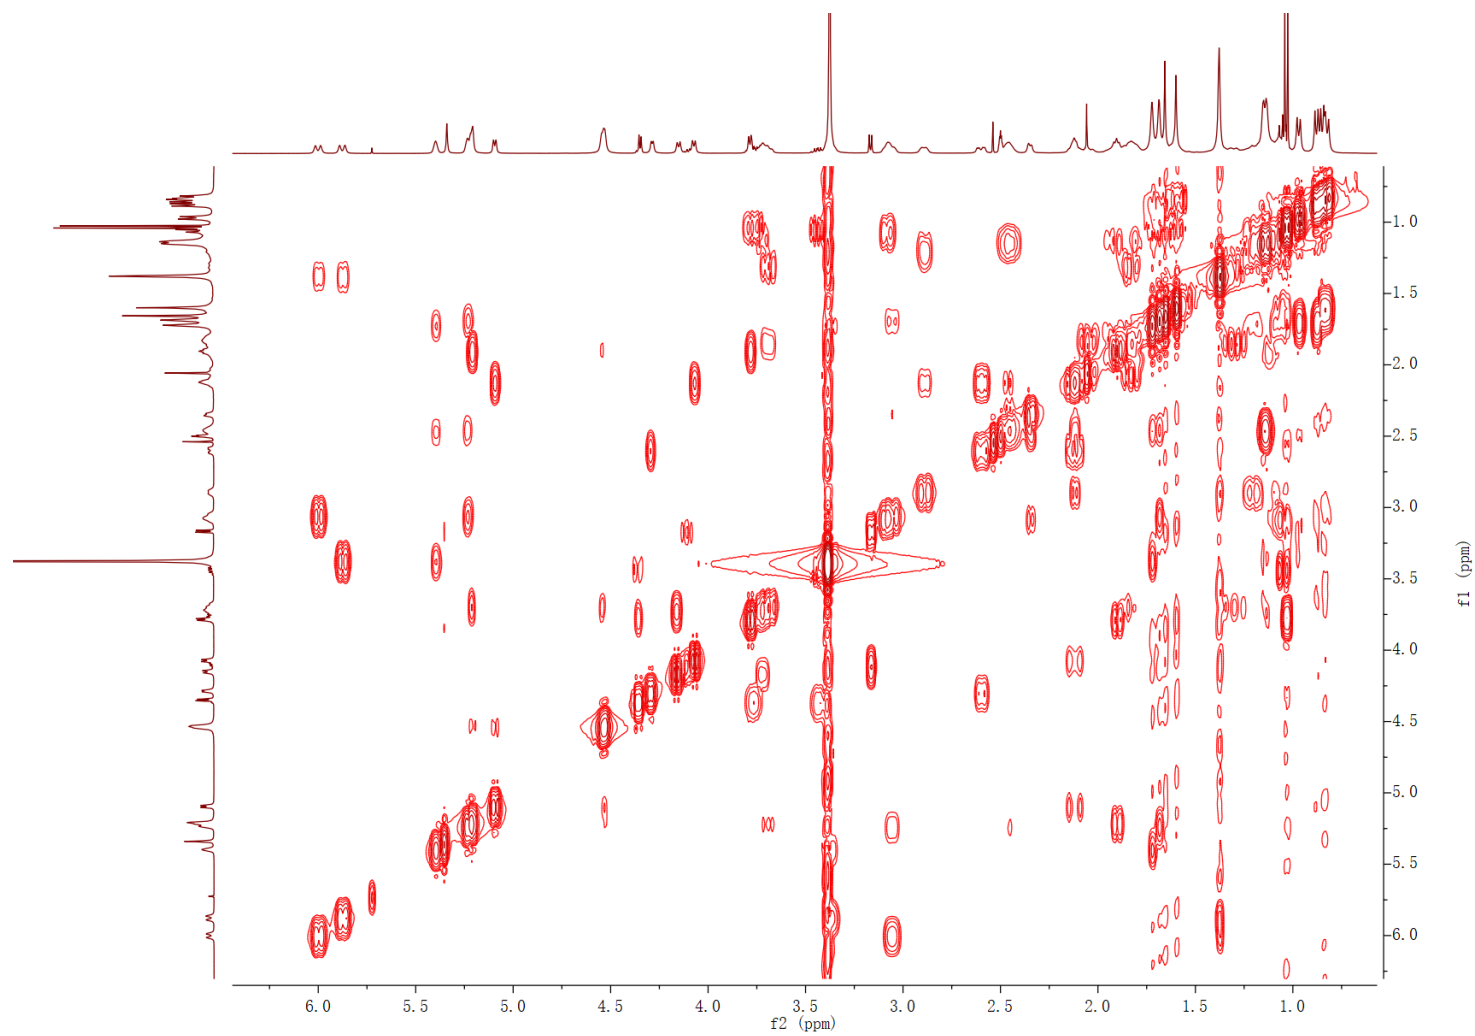

**Figure S10.**  $^1\text{H}$ - $^1\text{H}$  COSY of compound **1** (in  $\text{DMSO-}d_6$ )

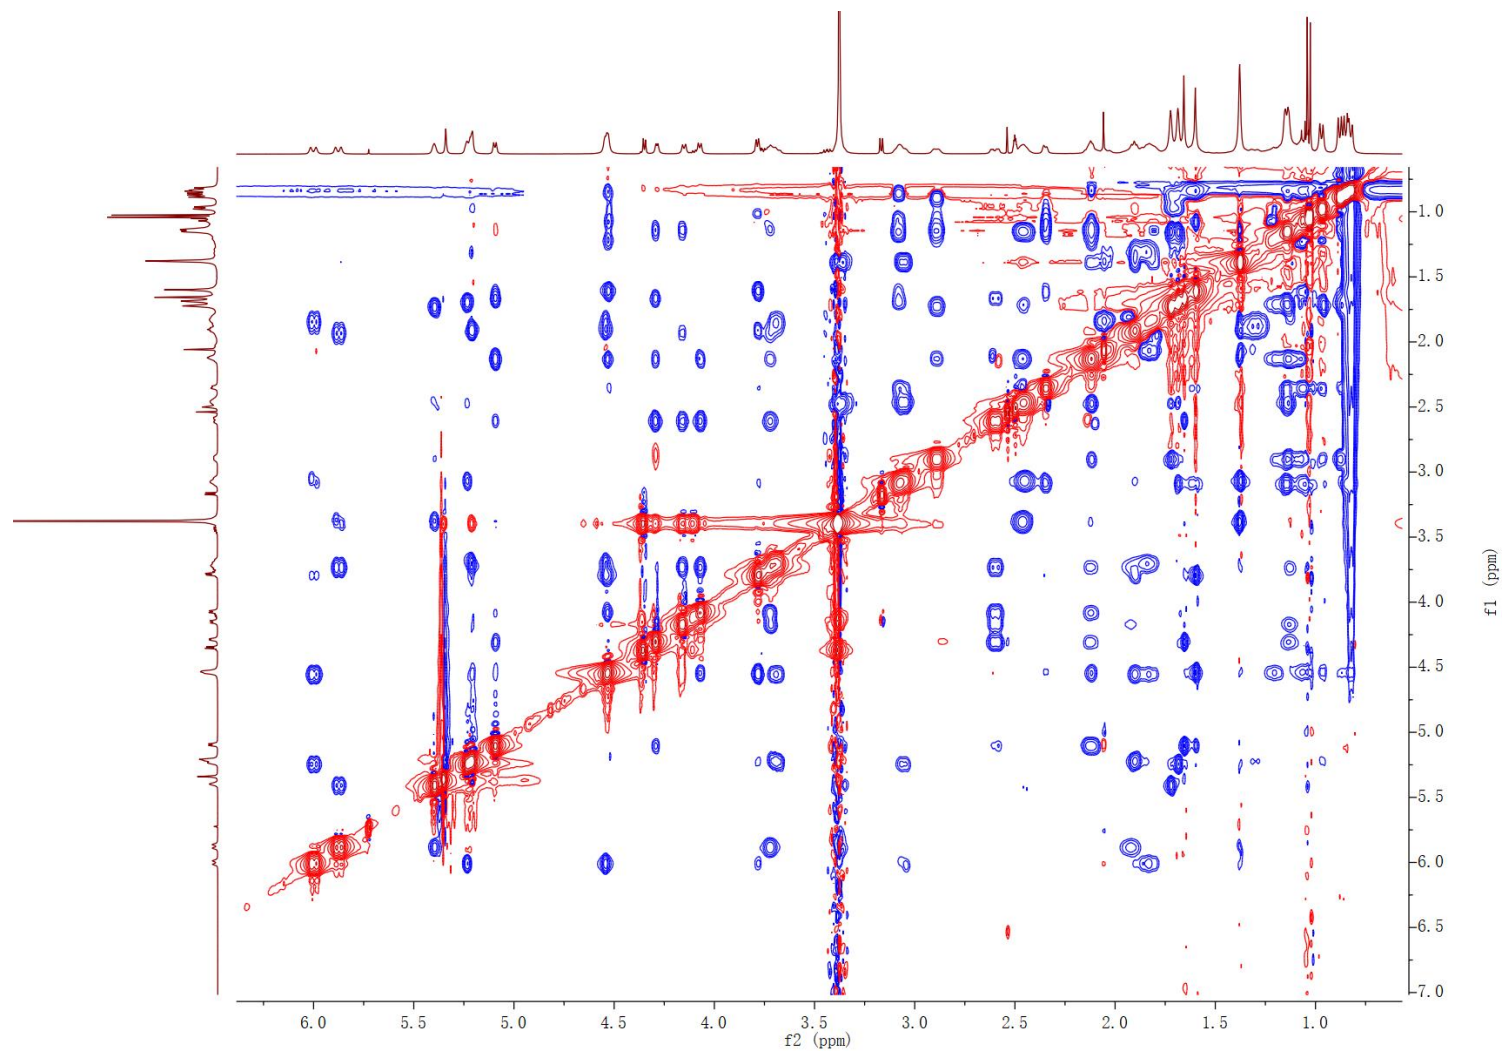

**Figure S11.** ROESY of compound1 (in DMSO- $d_6$ )

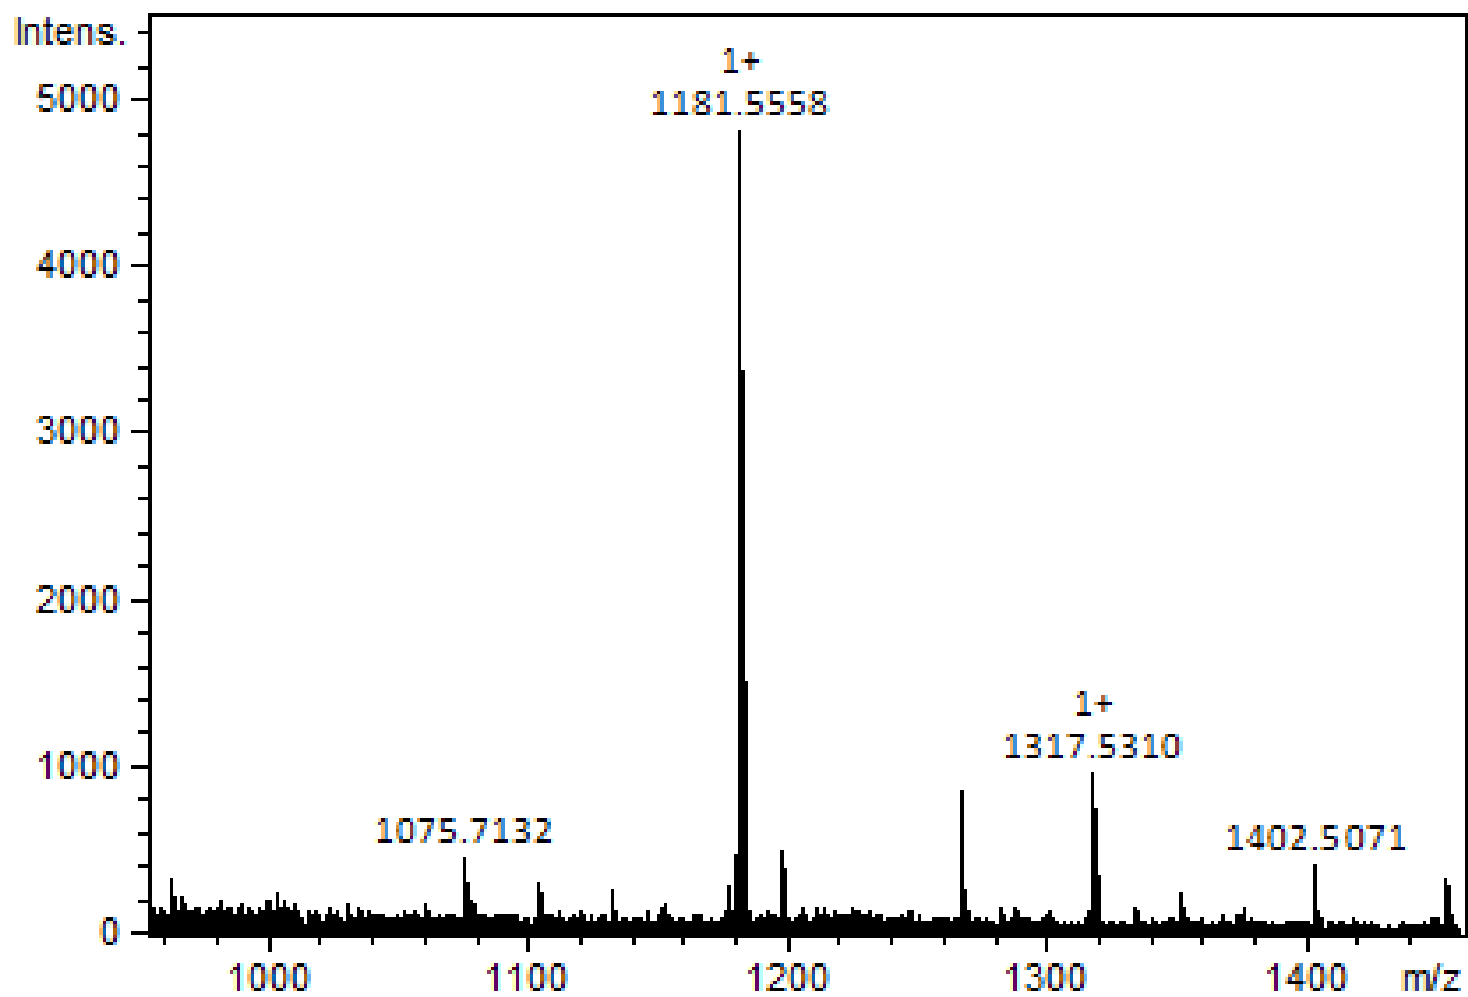

Figure S12. HRESIMS of compound 1

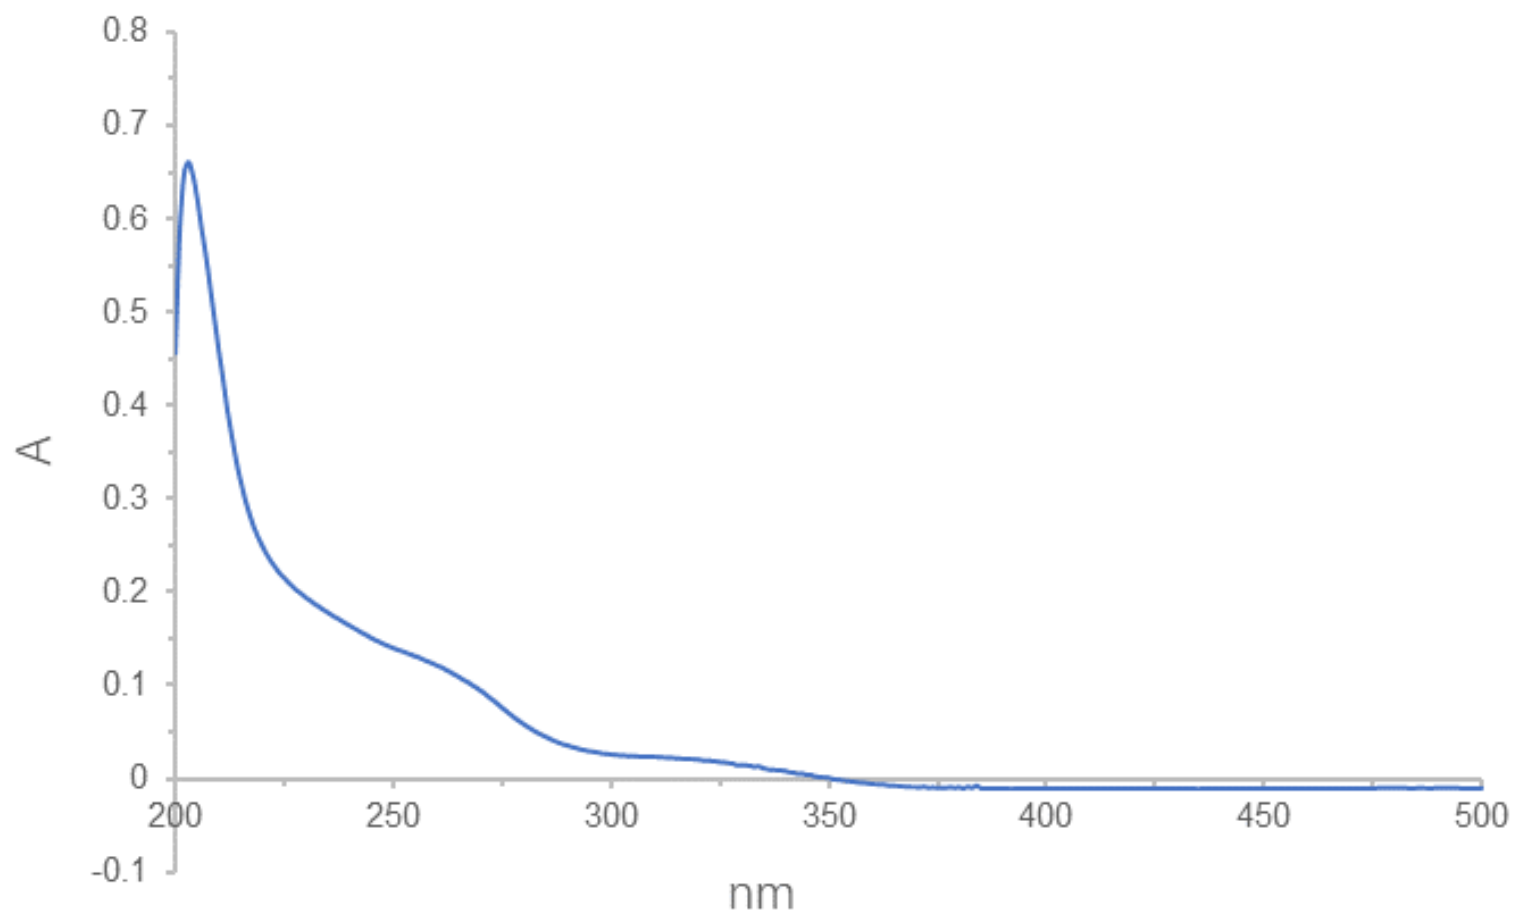

**Figure S13.** UV of compound **1**

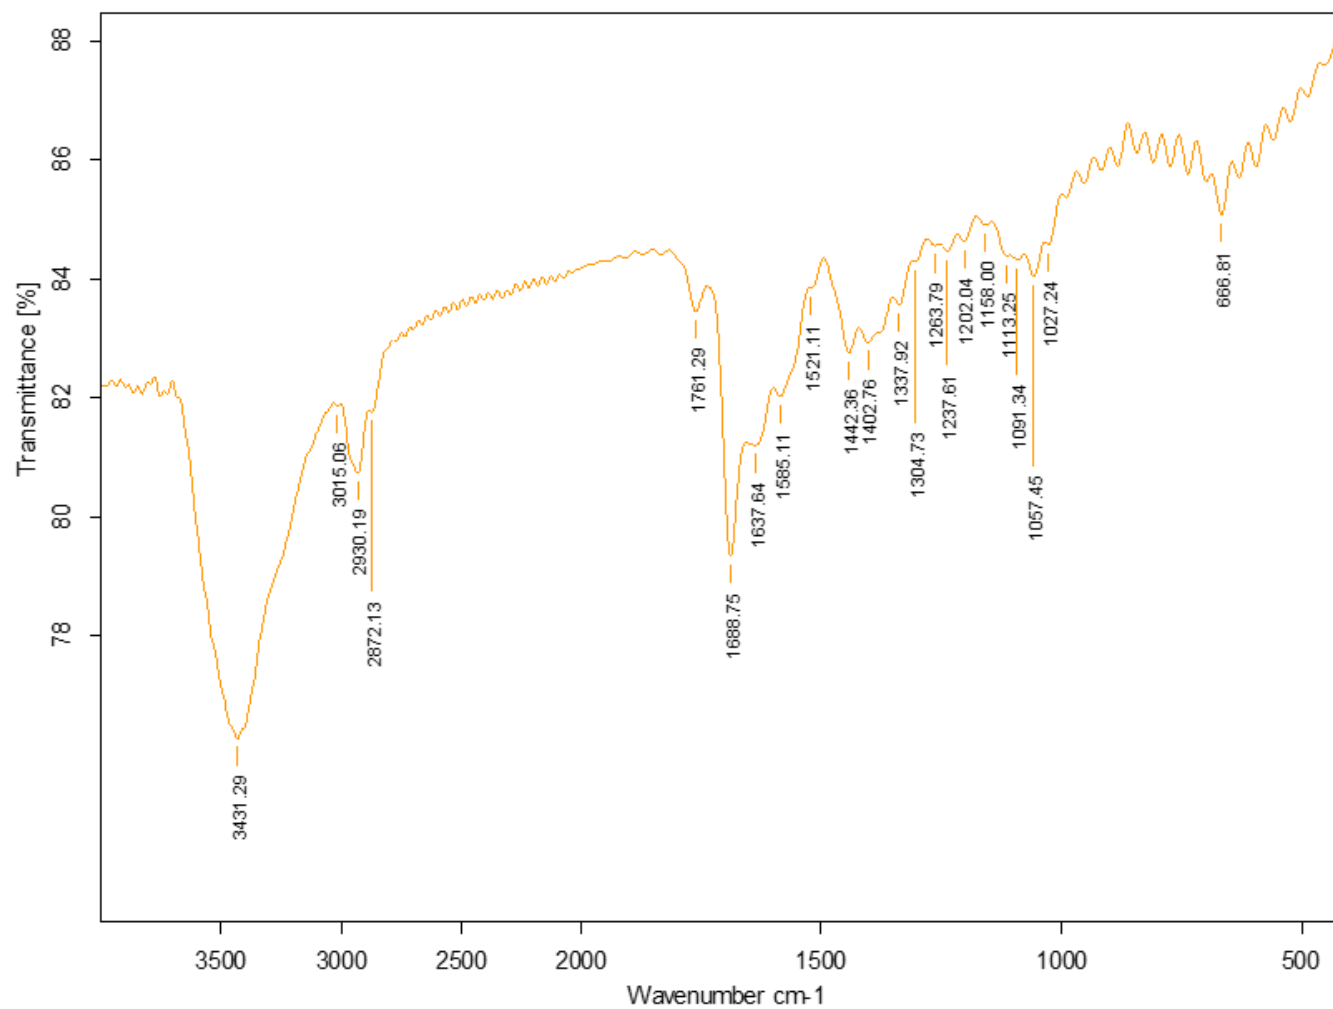

**Figure S14.** IR of compound 1

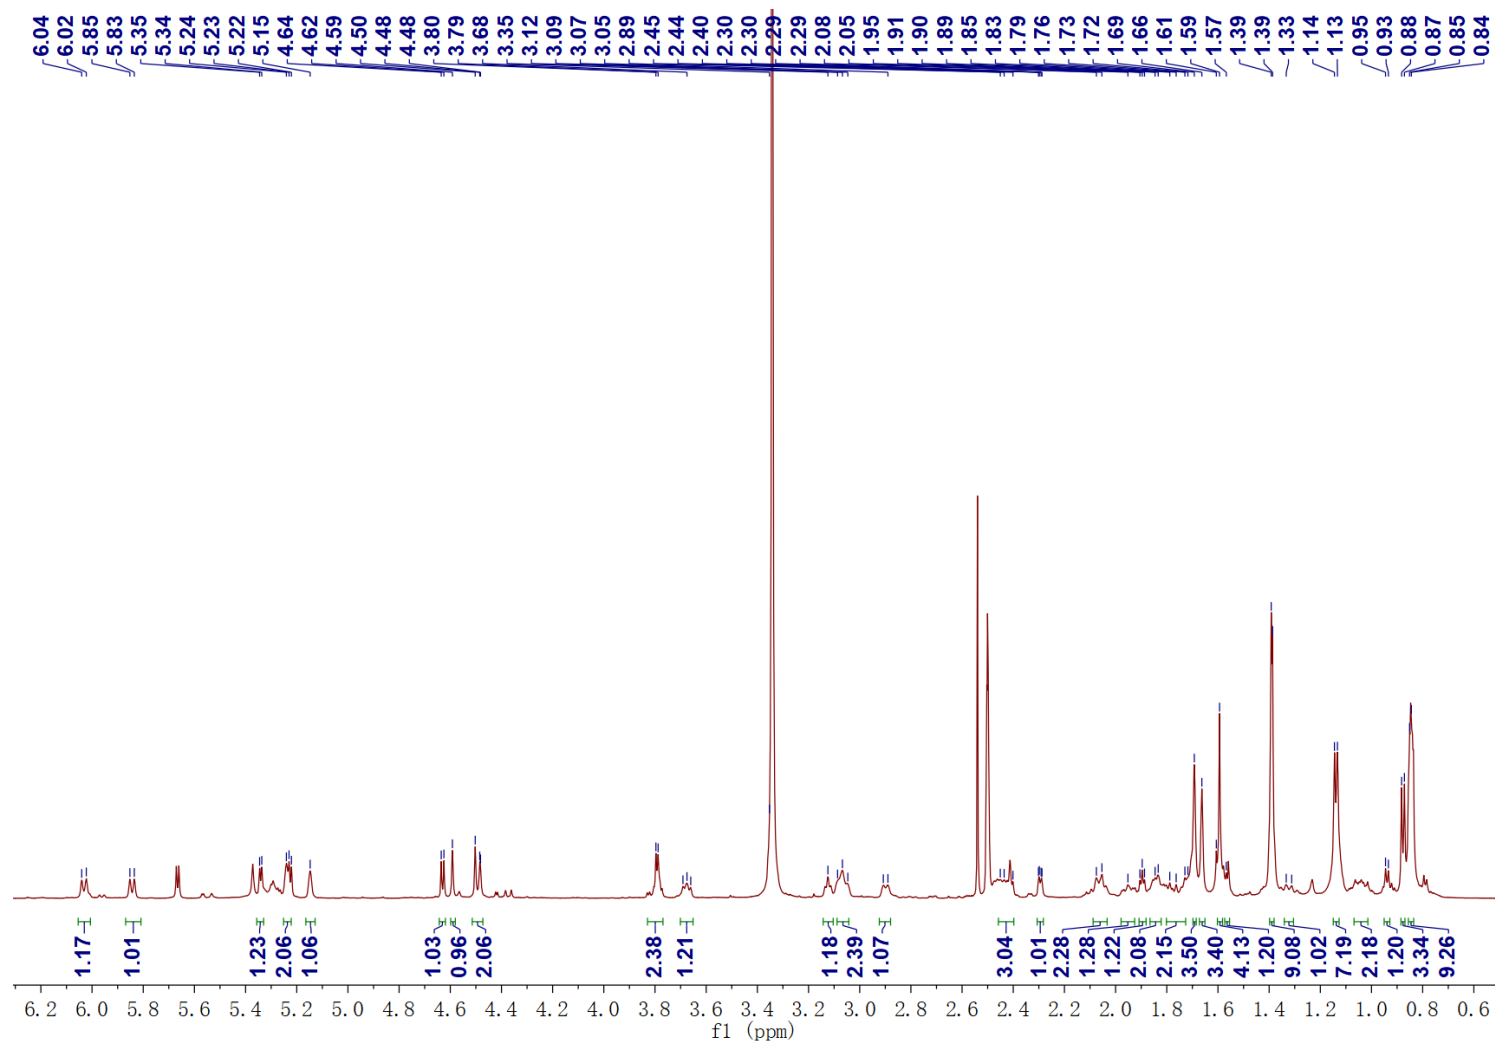

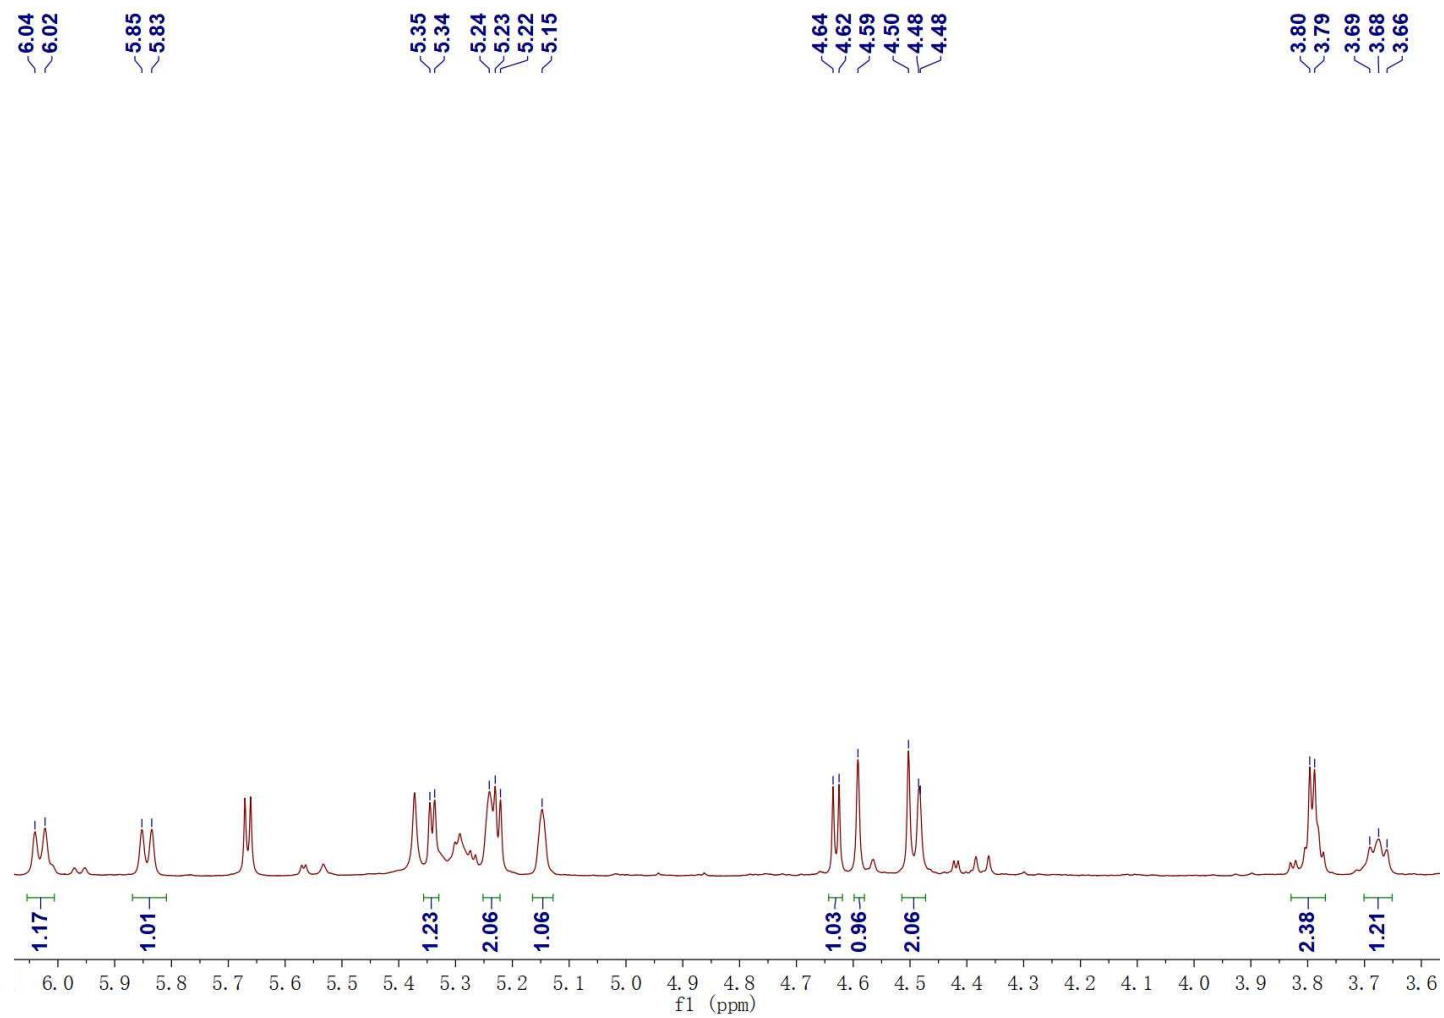

**Figure S16.** Enlarged <sup>1</sup>H NMR spectrum (6.1 ~ 3.6 ppm) of compound **2**



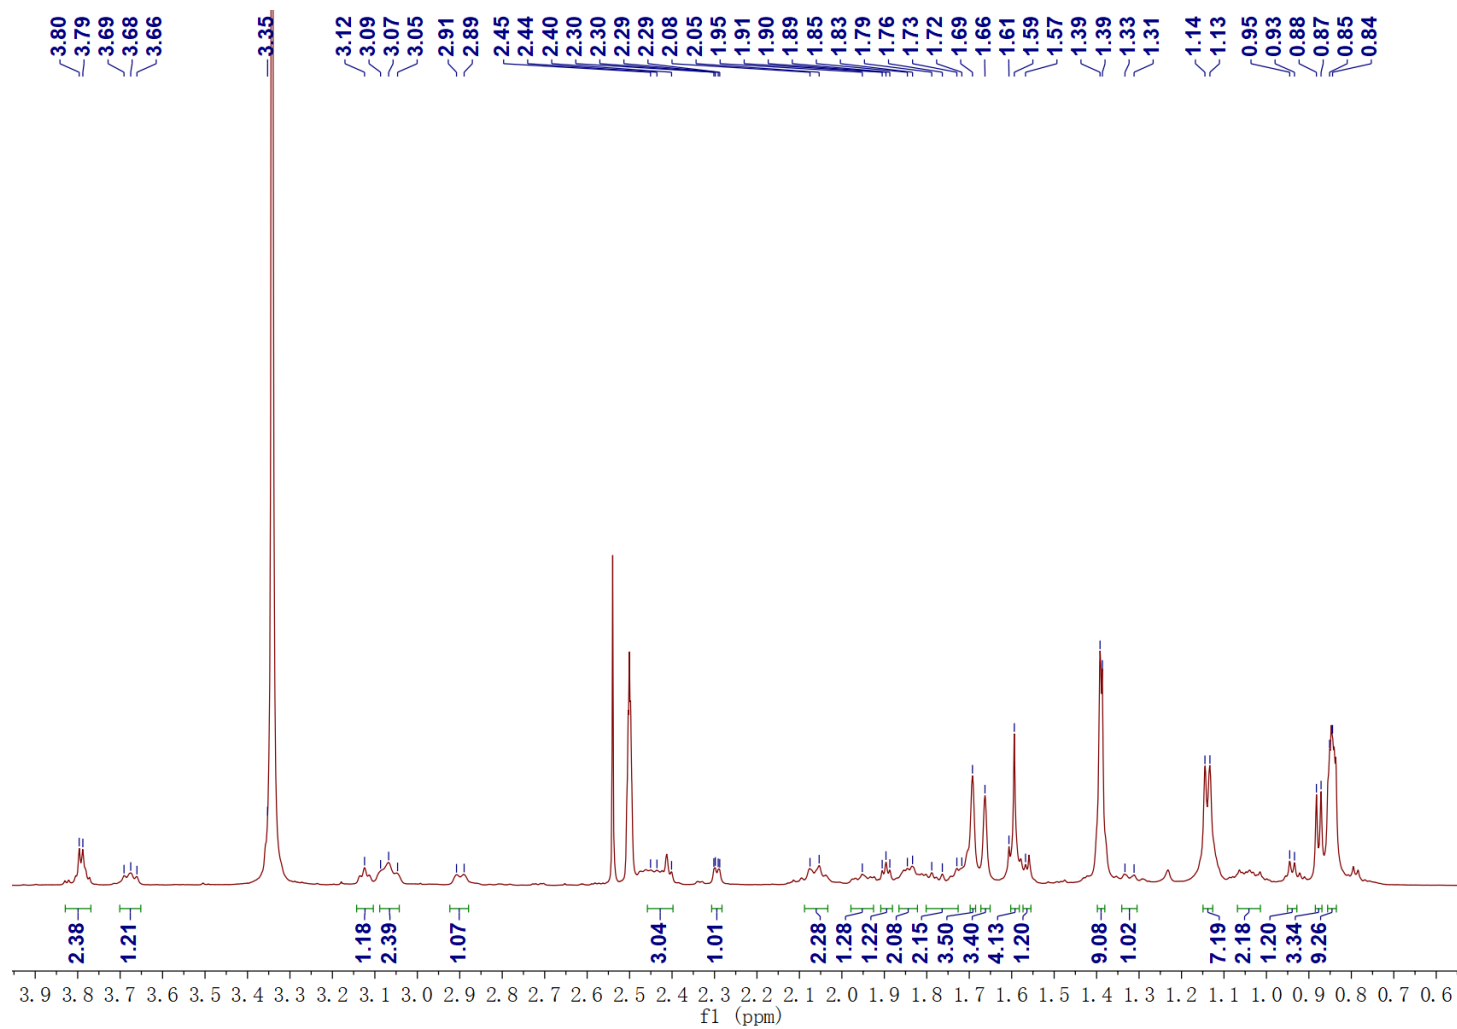

**Figure S17.** Enlarged  $^1\text{H}$  NMR spectrum (3.9 ~ 0.7 ppm) of compound **2**

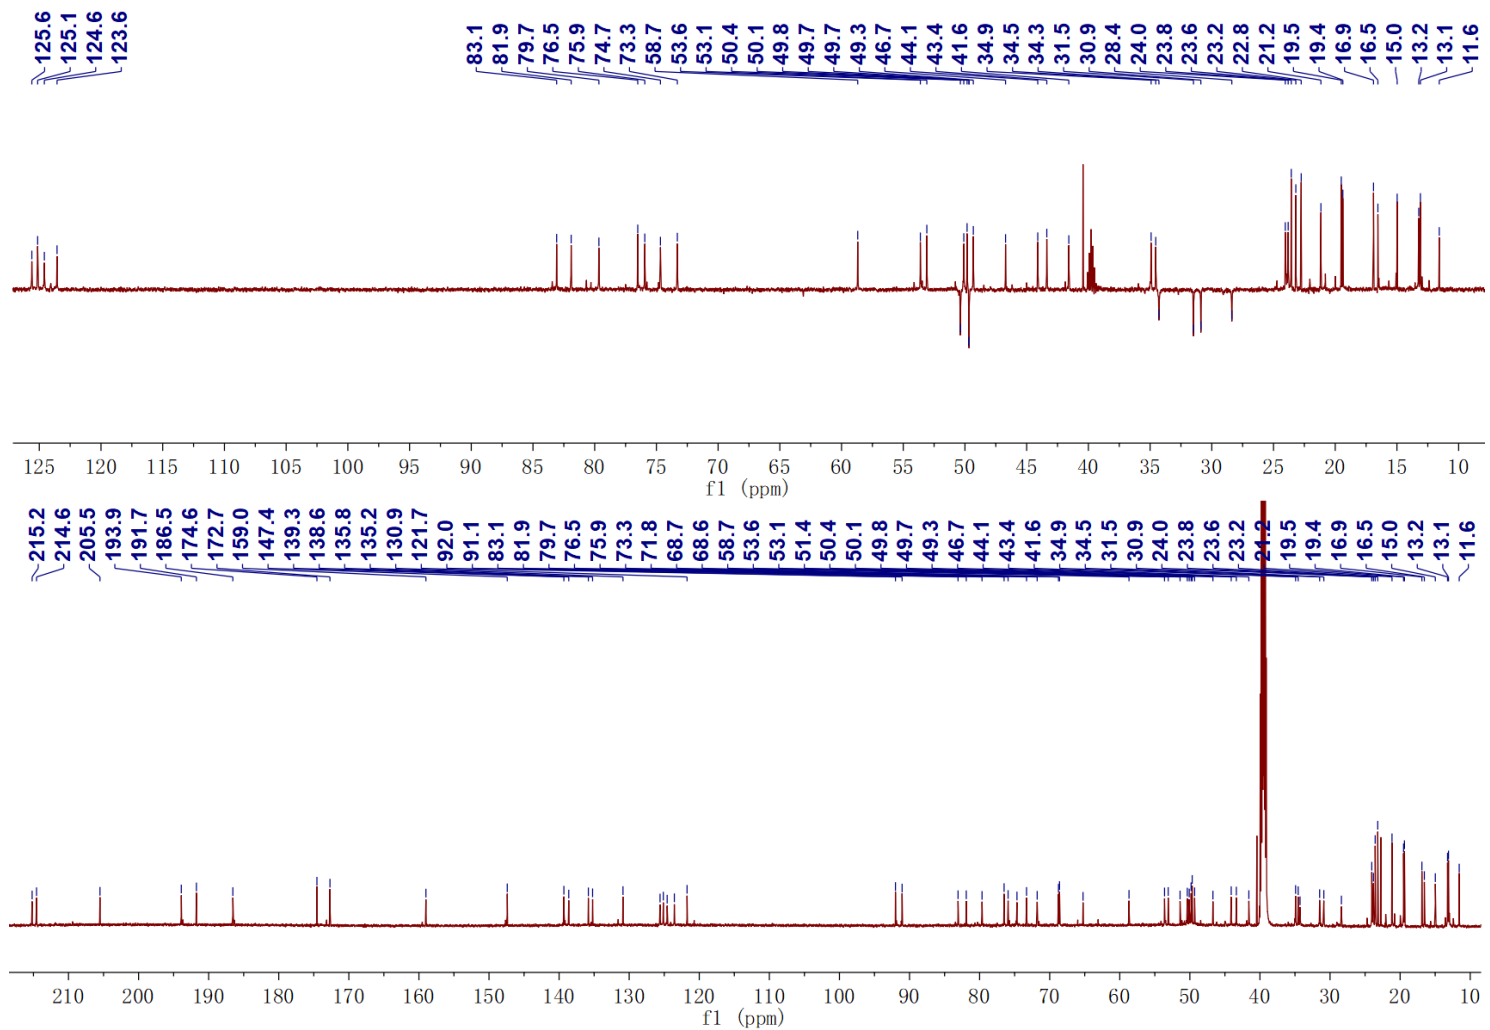

**Figure S18.**  $^{13}\text{C}$  NMR NMR of compound 2 (in  $\text{DMSO-}d_6$ )

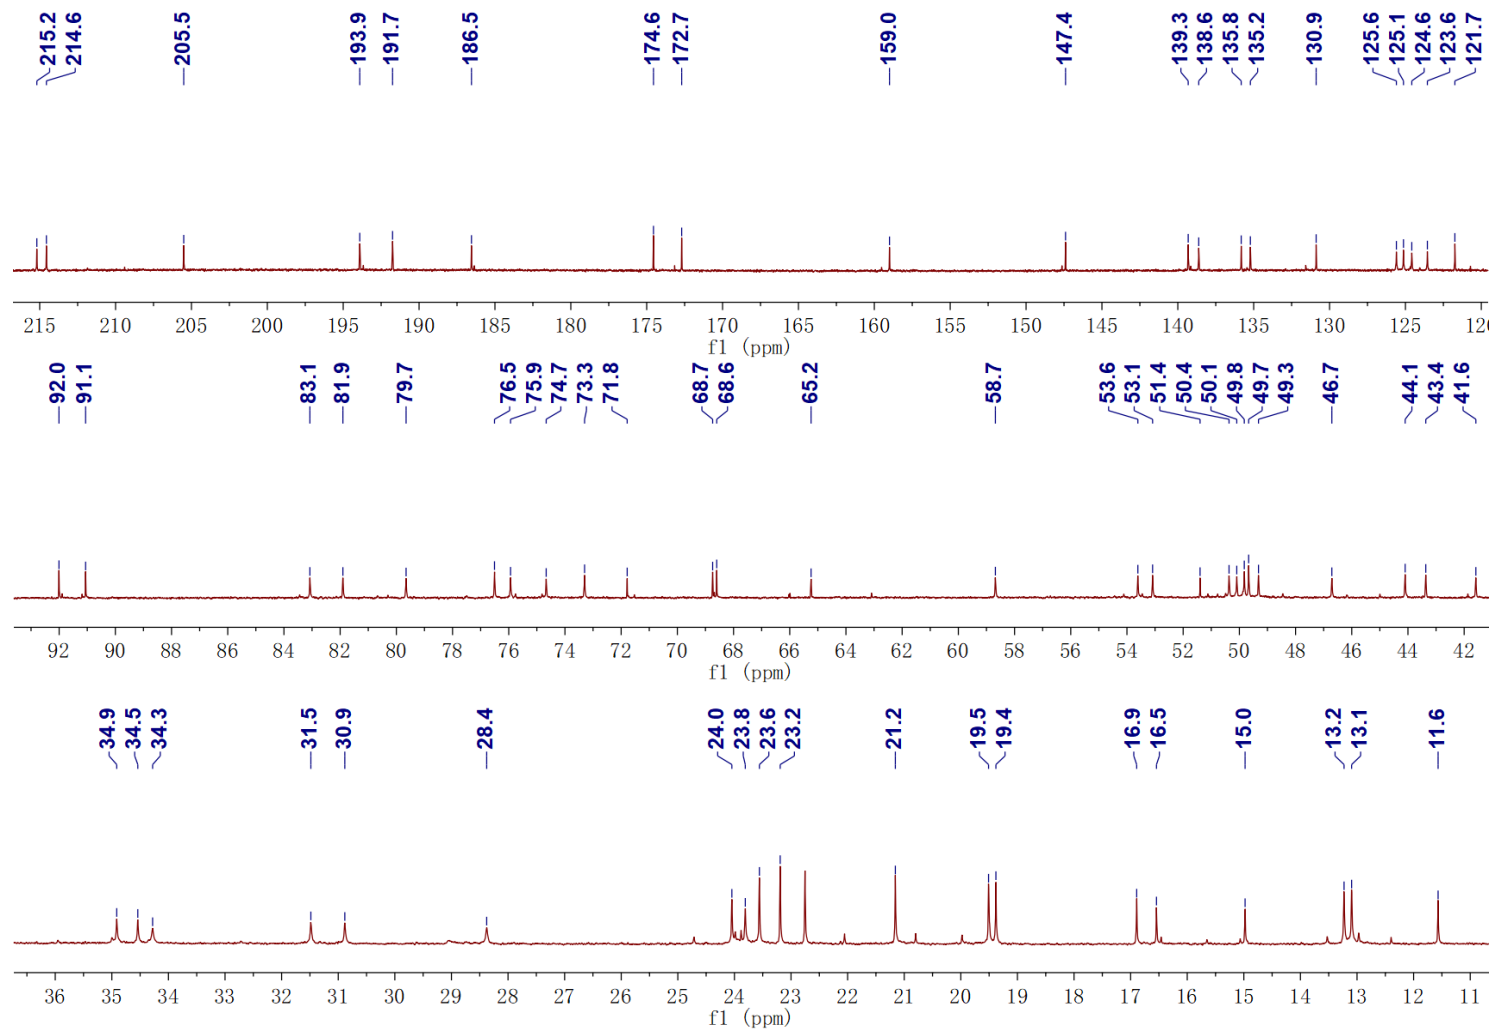

**Figure S19.** Enlarged <sup>13</sup>C NMR spectrum of compound 2

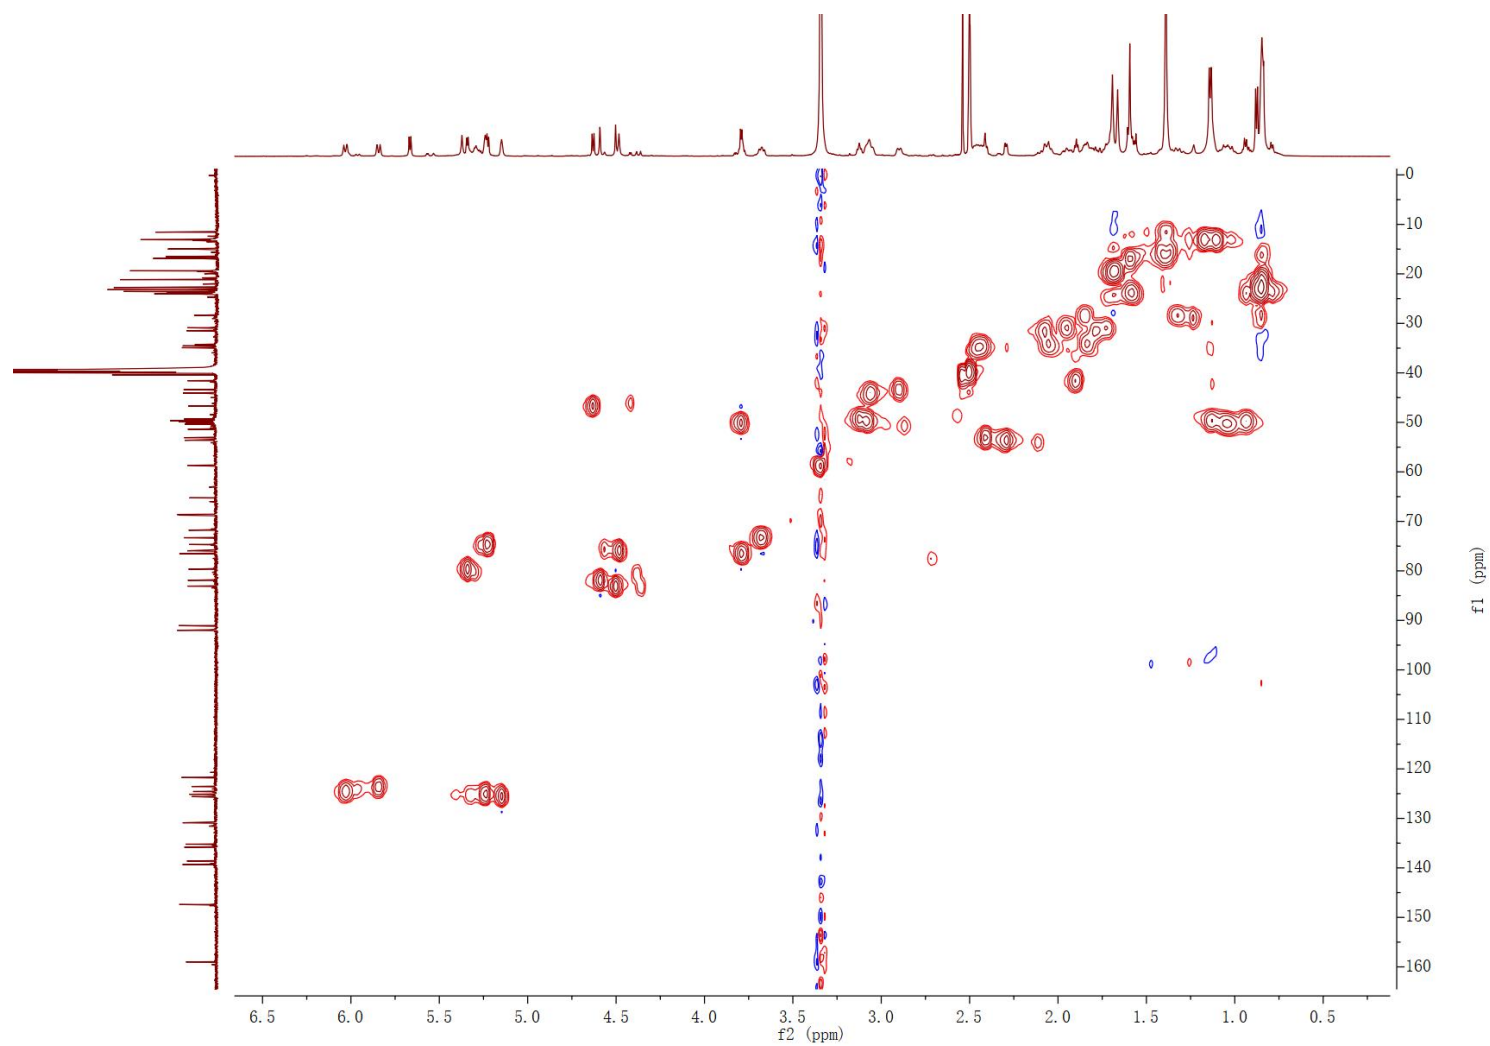

**Figure S20.** HSQC of compound 2 (in DMSO-*d*<sub>6</sub>)

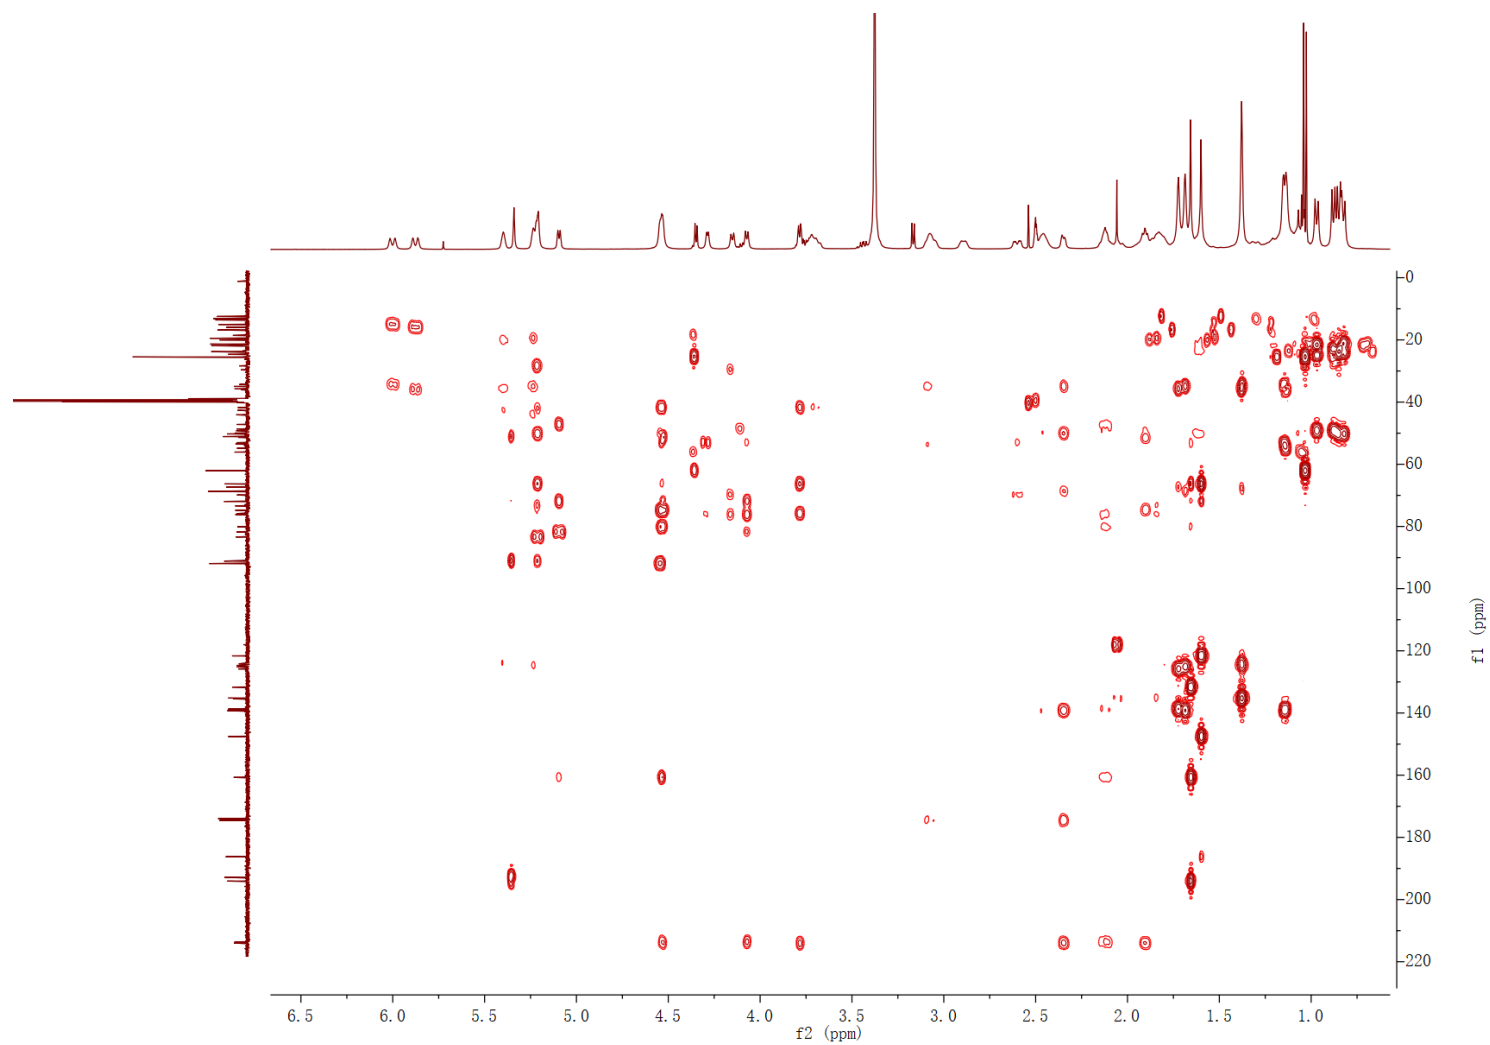

**Figure S21.** HMBC of compound **2** (in DMSO-*d*<sub>6</sub>)

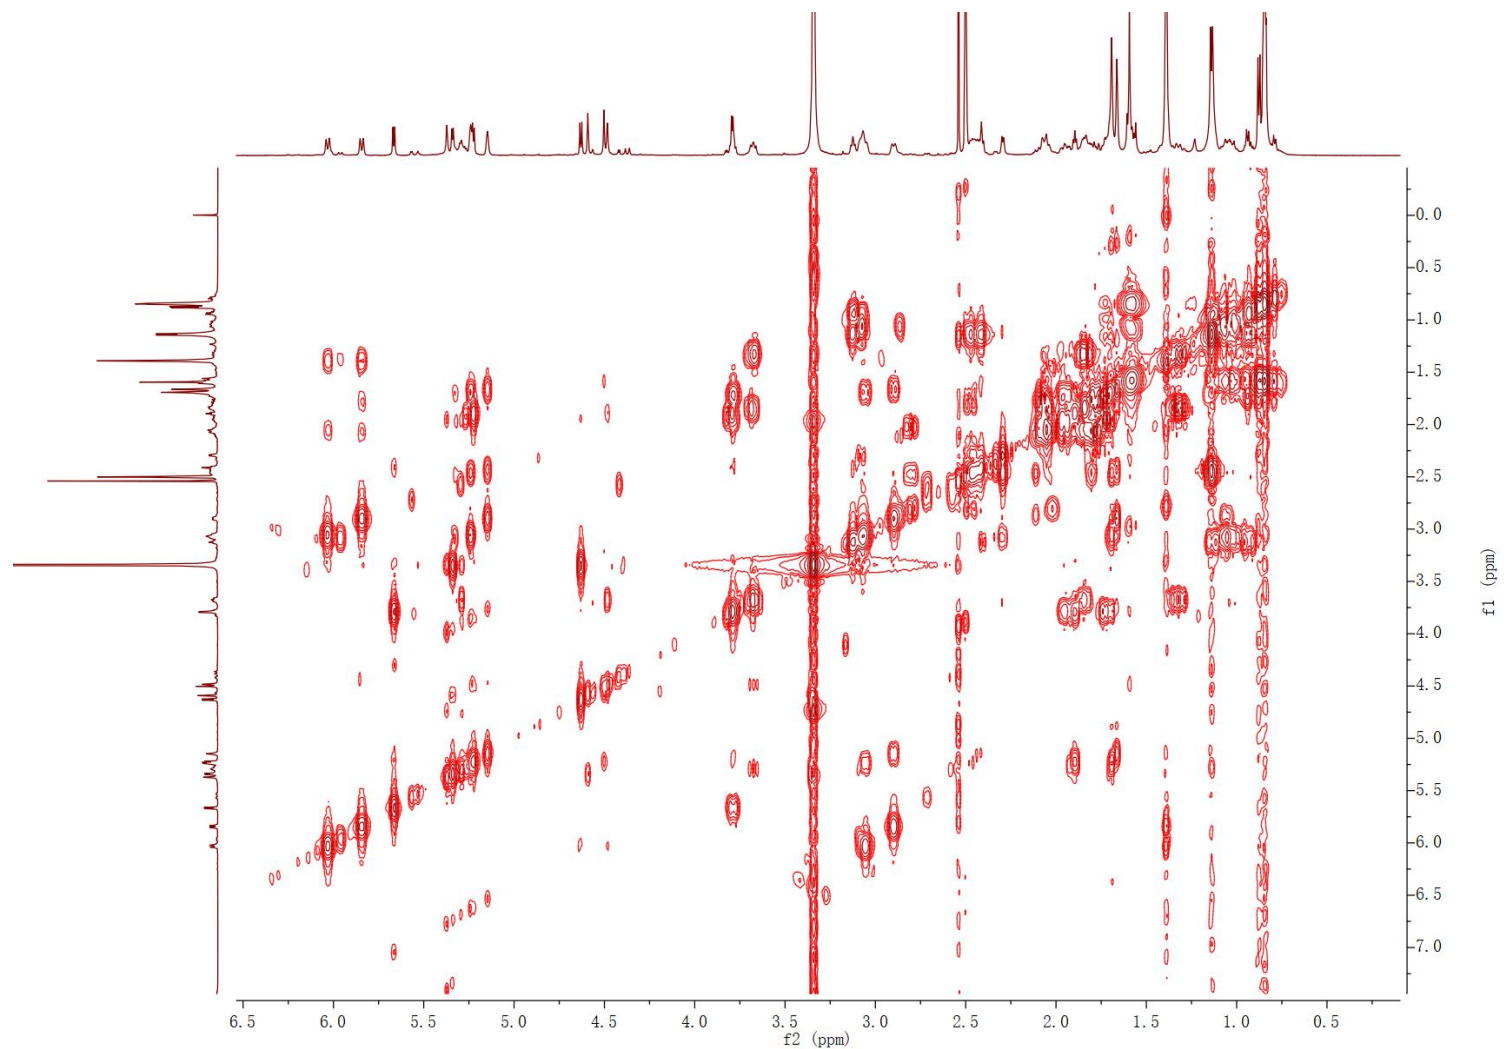

**Figure S22.**  $^1\text{H}$ - $^1\text{H}$  COSY of compound **2** (in  $\text{DMSO-}d_6$ )

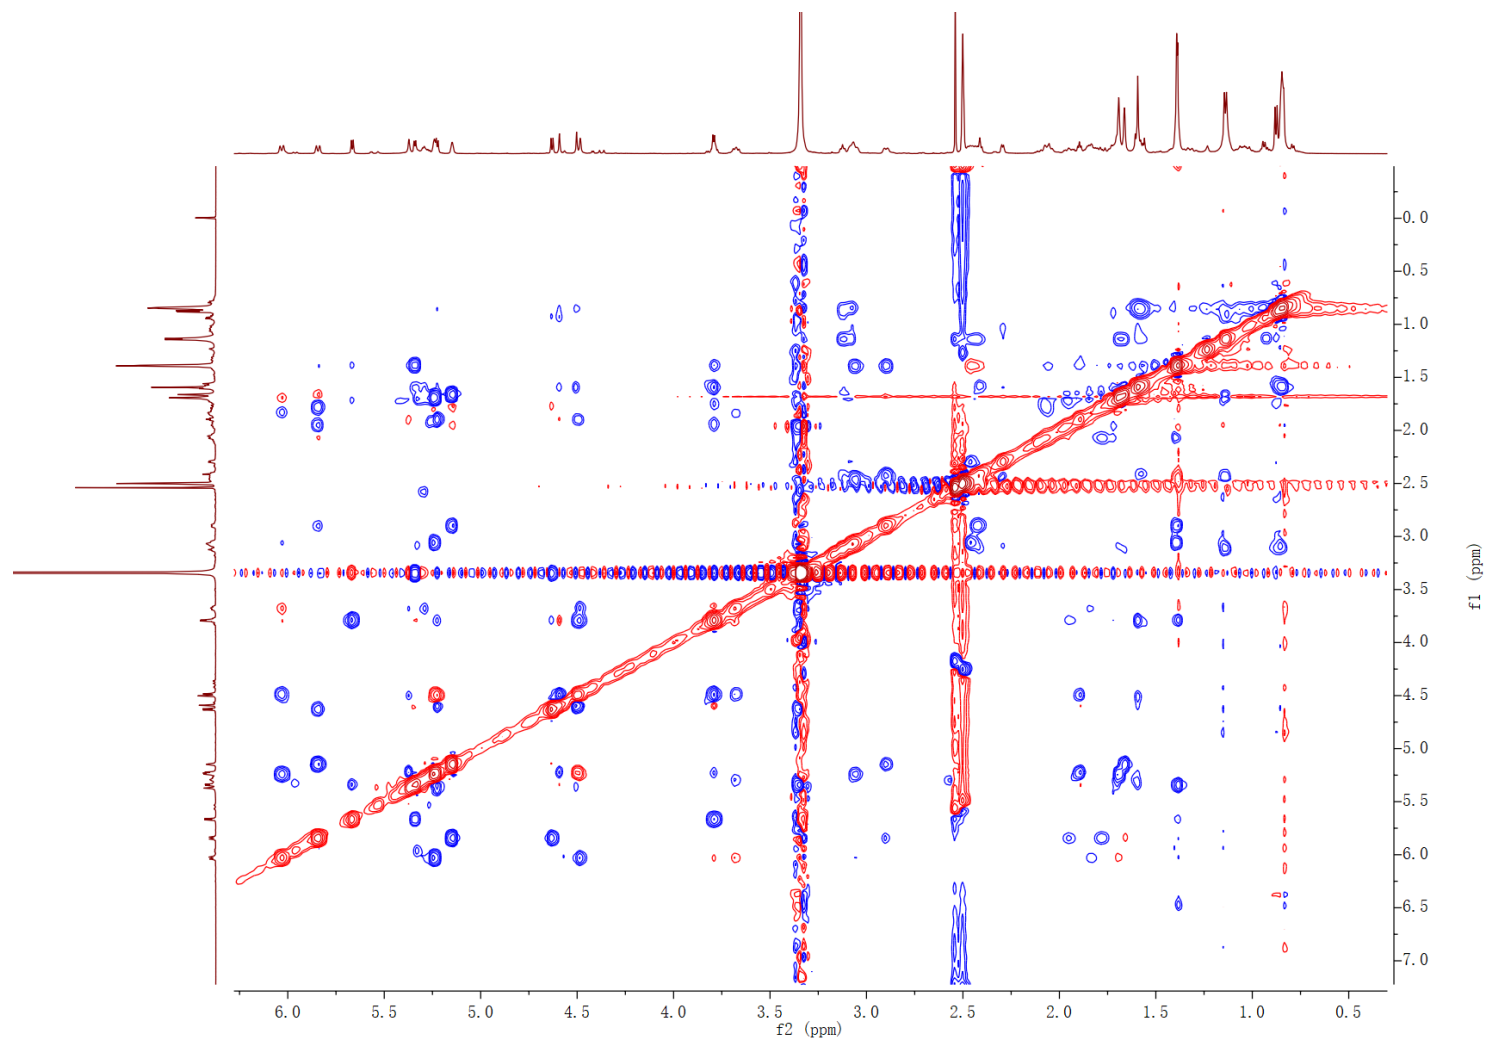

**Figure S23.** ROESY of compound **2** (in DMSO-*d*<sub>6</sub>)

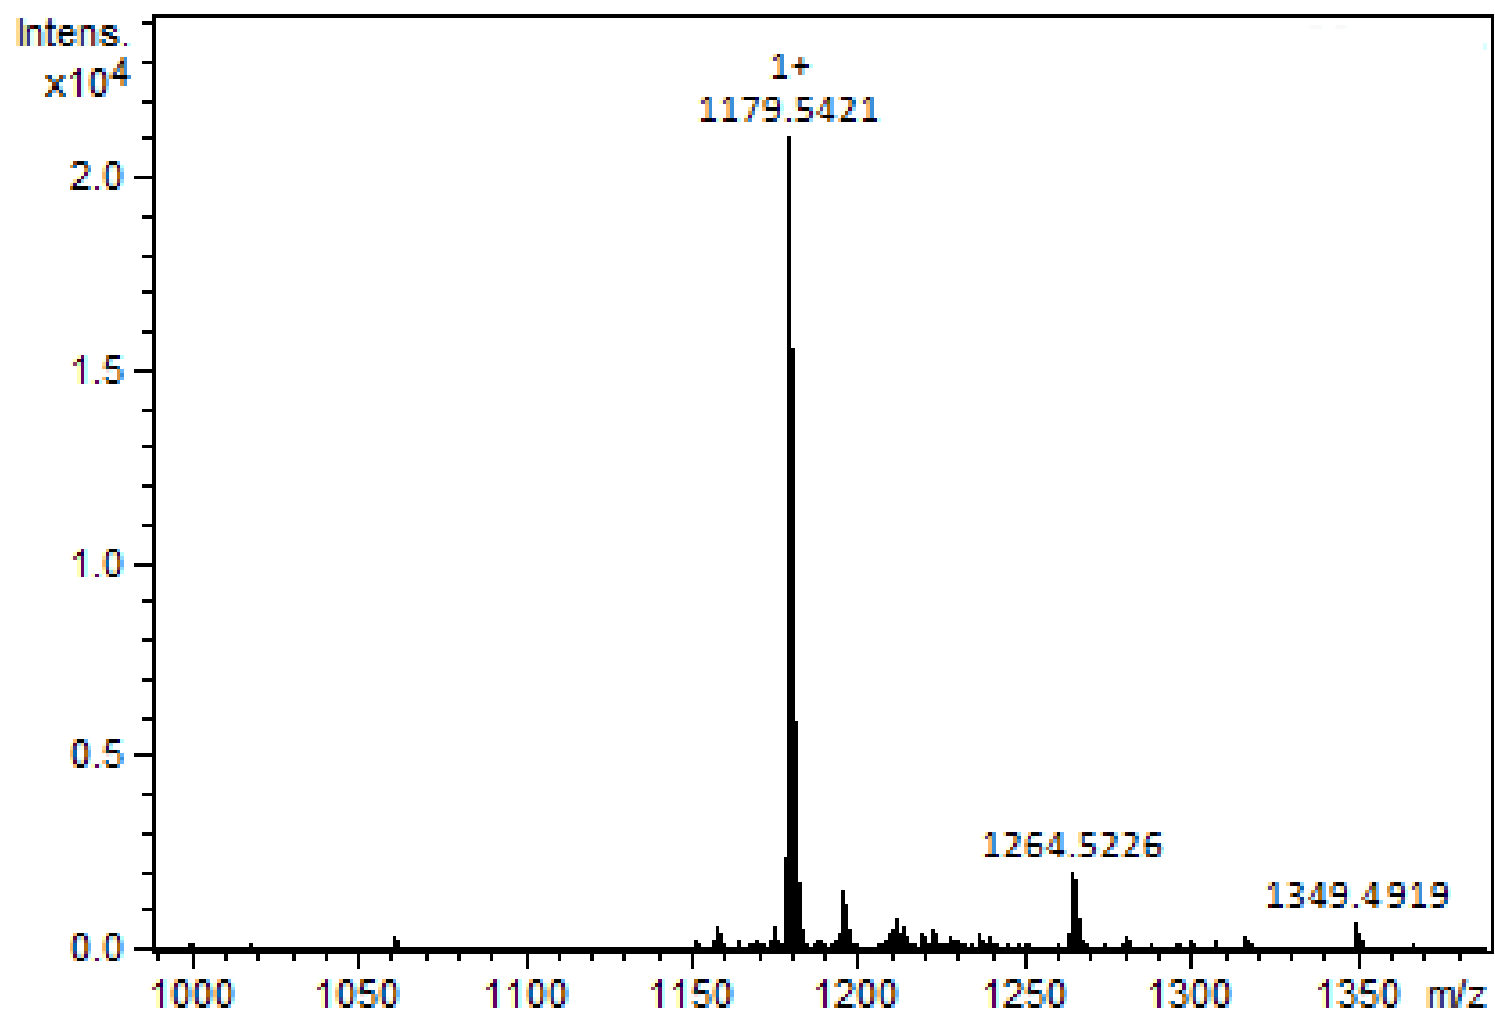

Figure S24. HRESIMS of compound 2



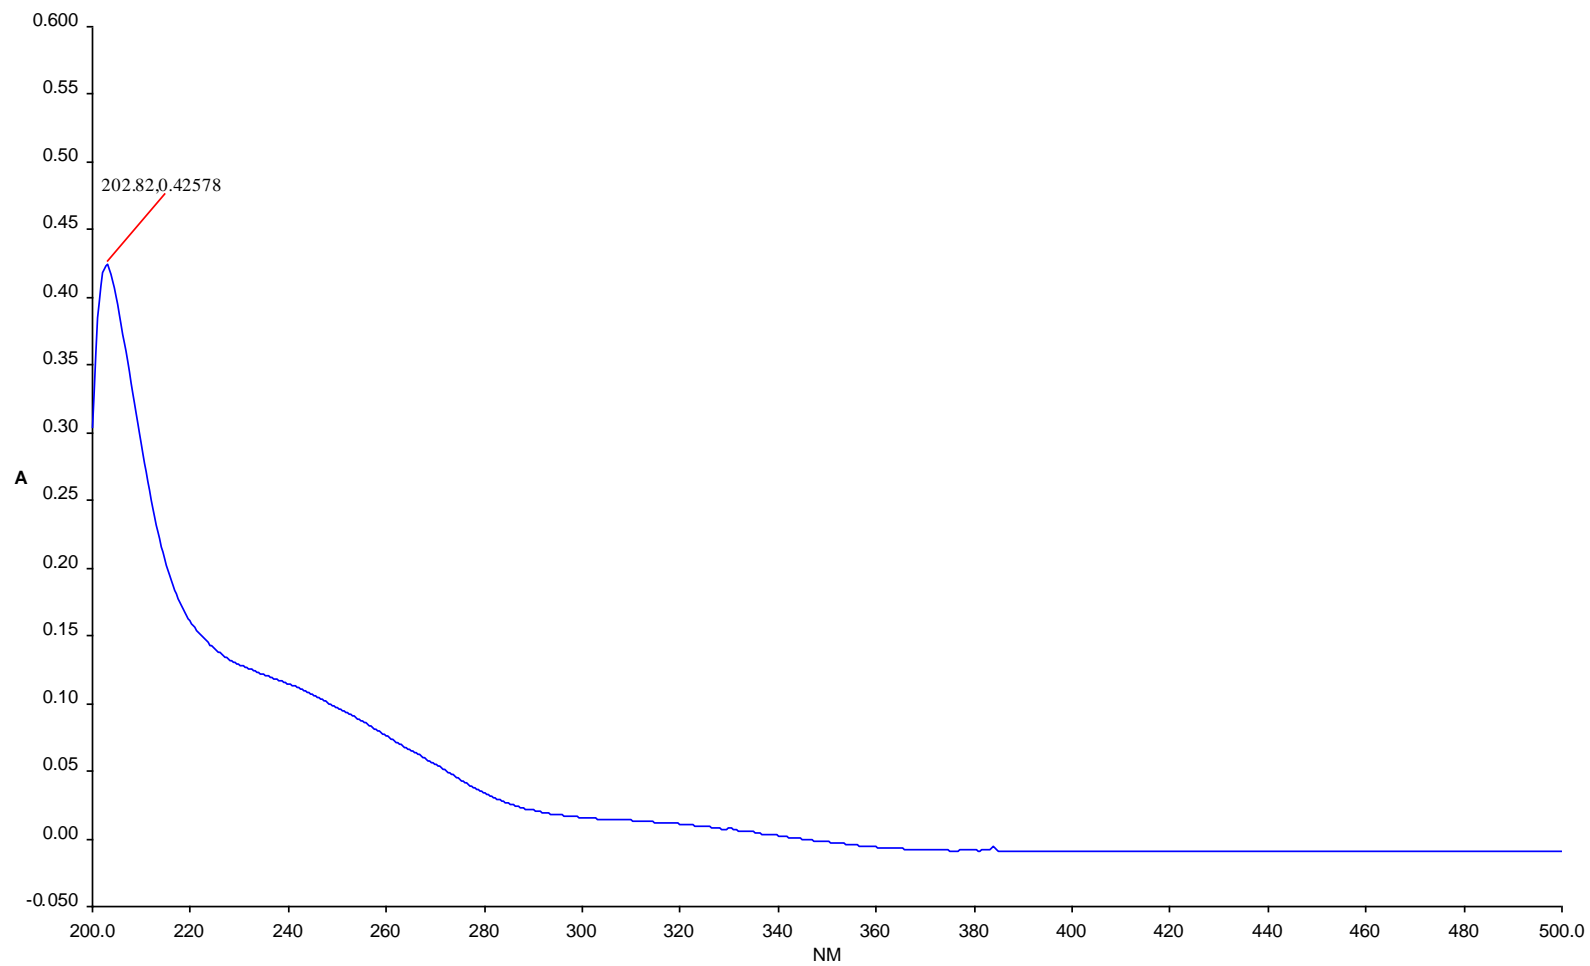

**Figure S25.** UV of compound 2

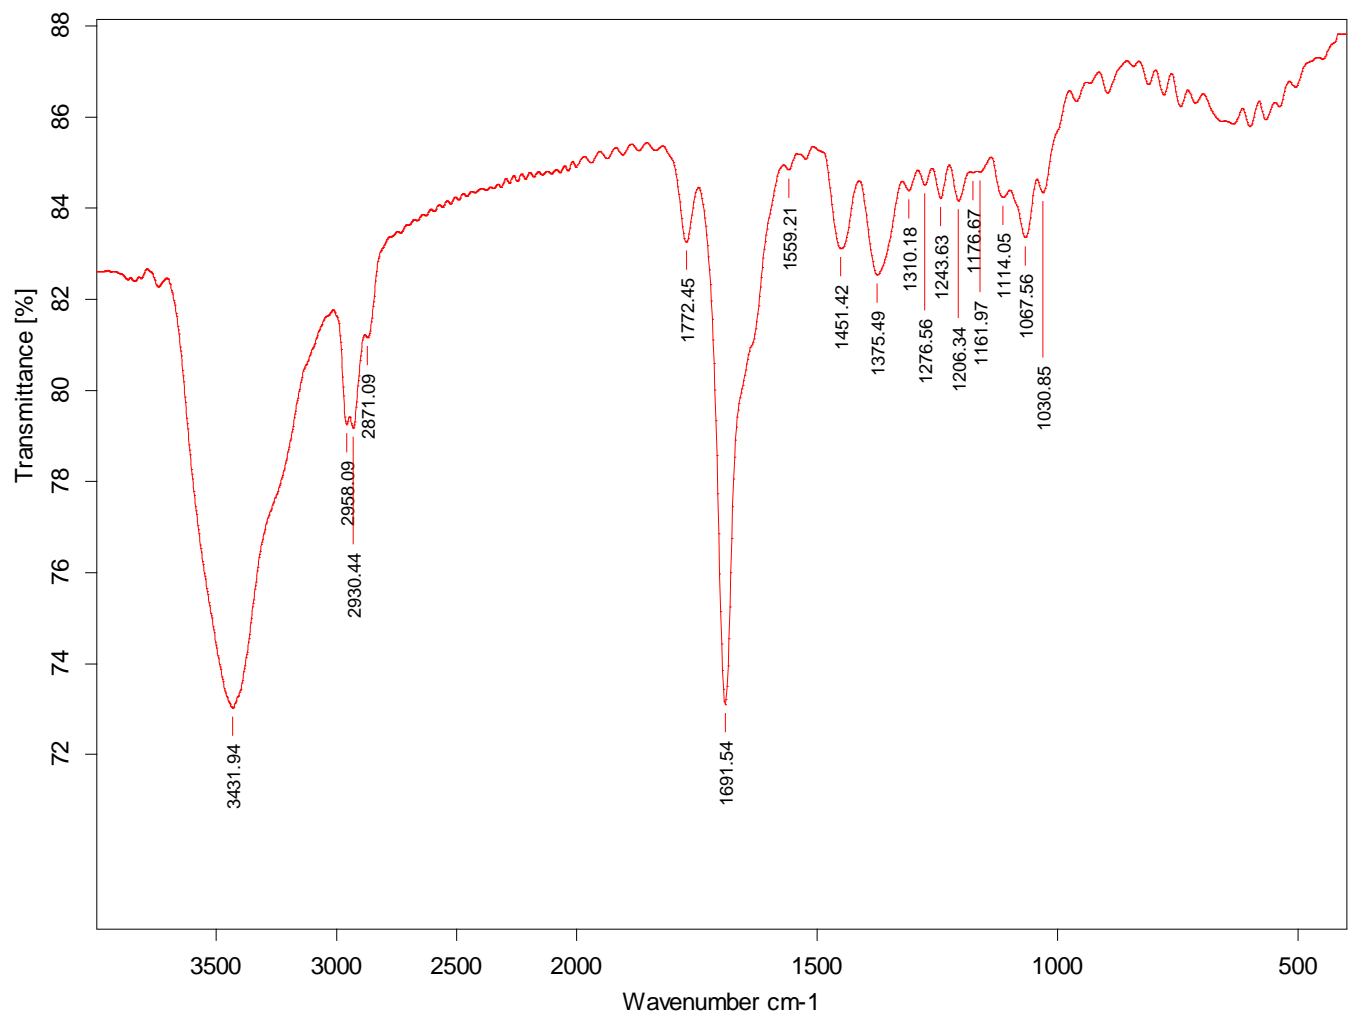

**Figure S26.** IR of compound 2

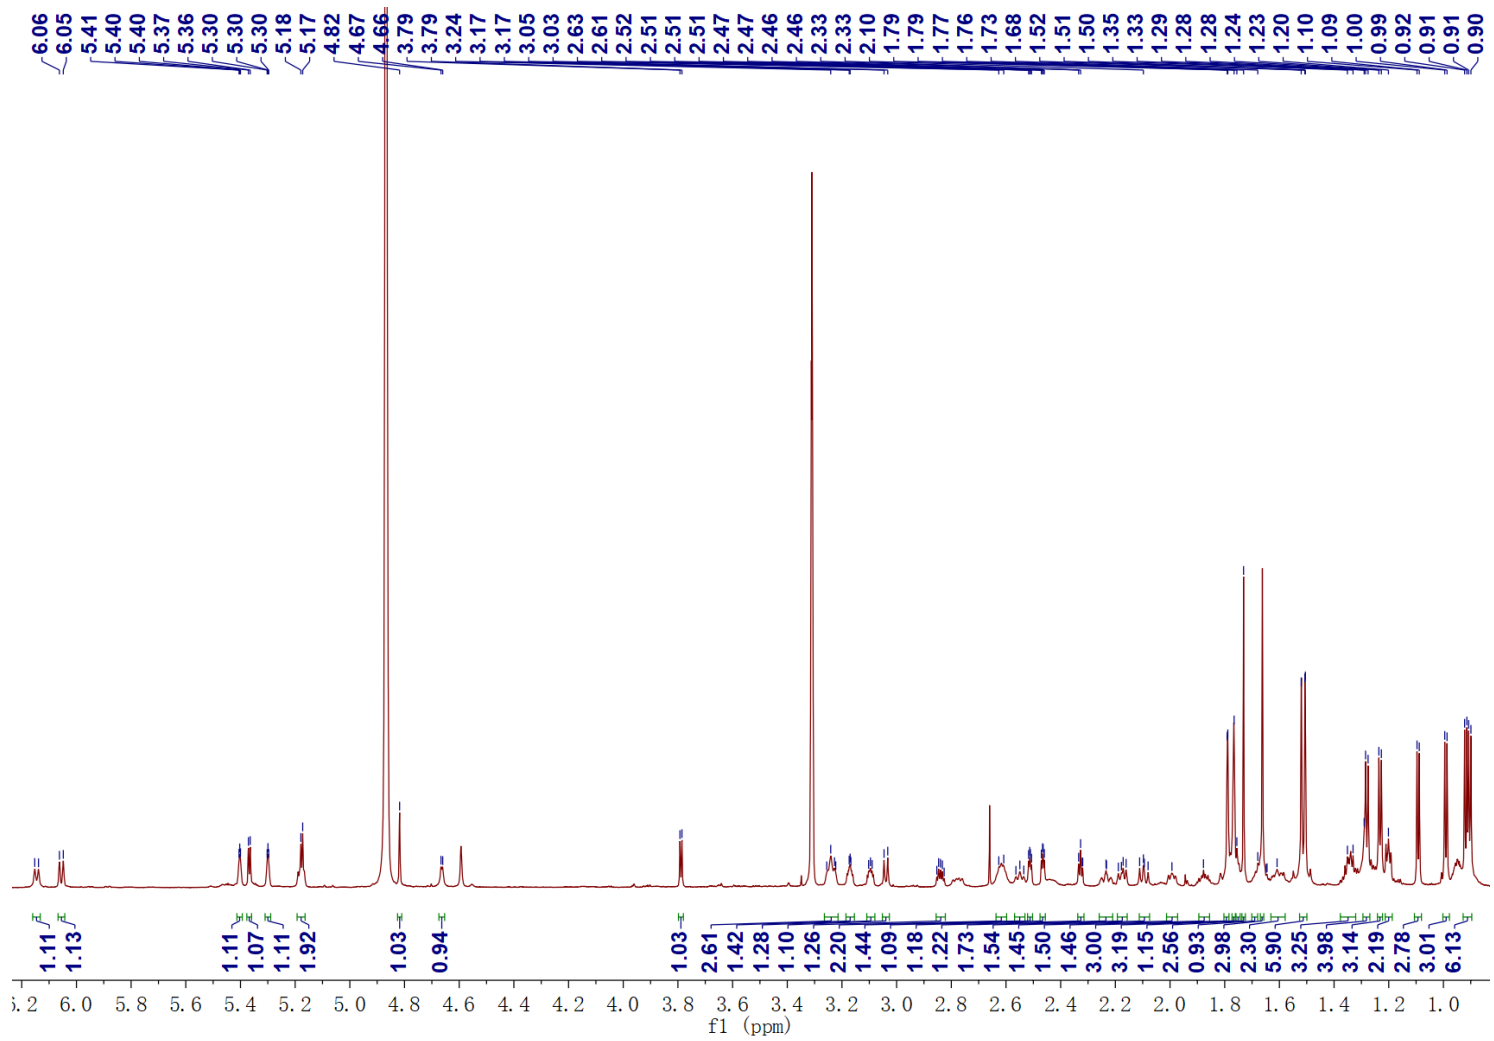

Figure S27. <sup>1</sup>H NMR of compound 3 (in CD<sub>3</sub>OD)

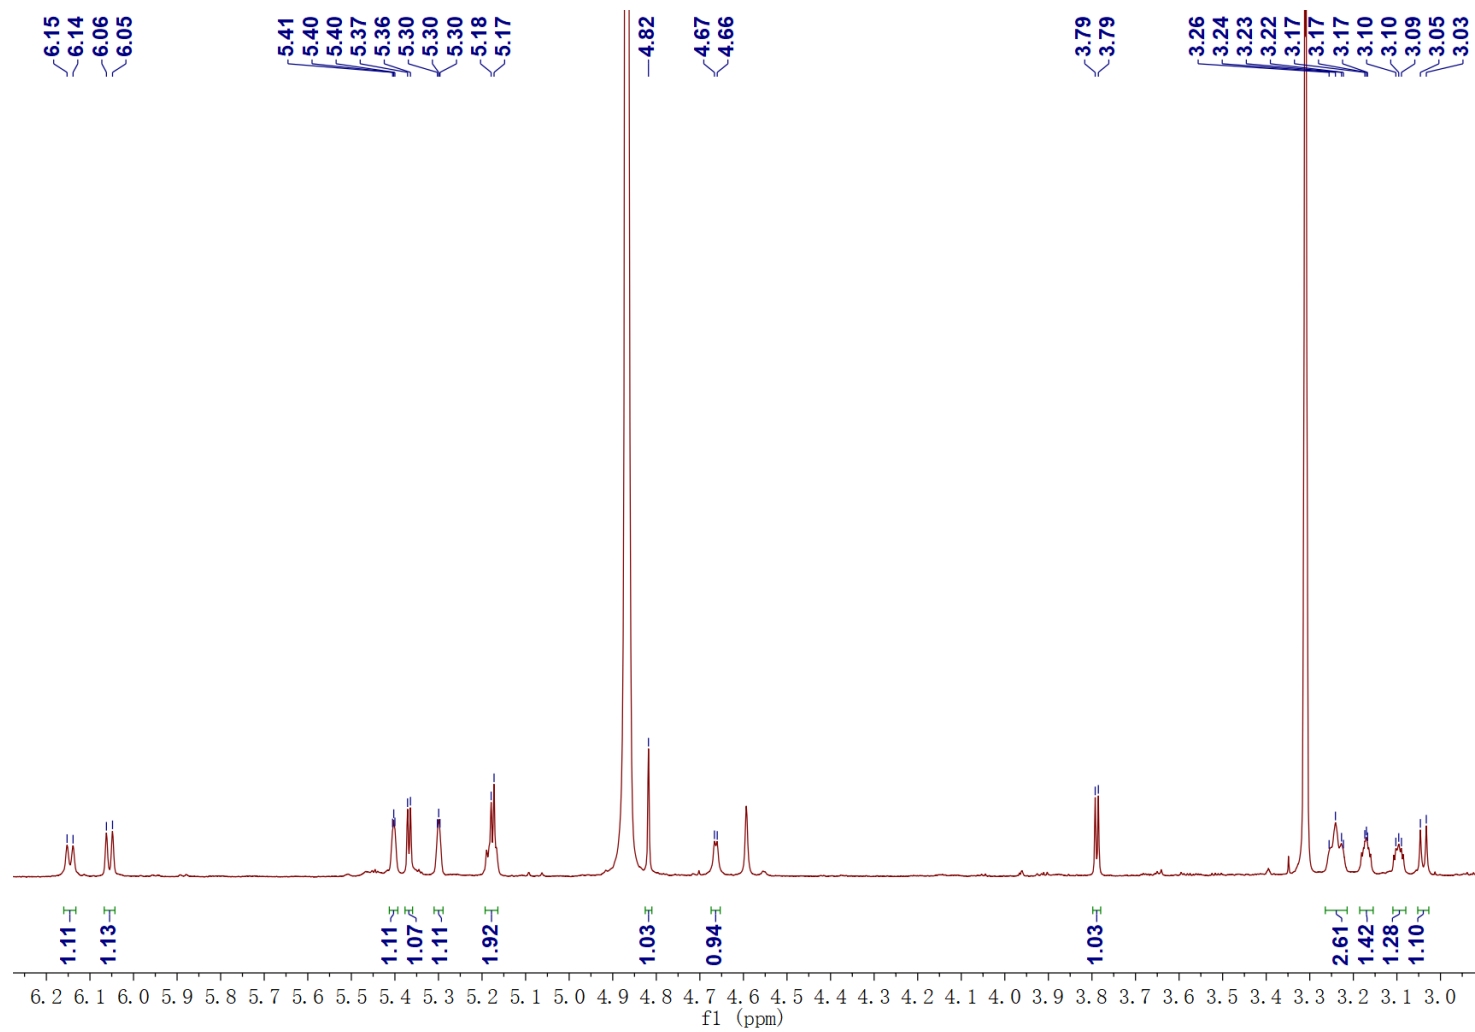

**Figure S28.** Enlarged  $^1\text{H}$  NMR spectrum (6.2 ~ 3.0 ppm) of compound **3**

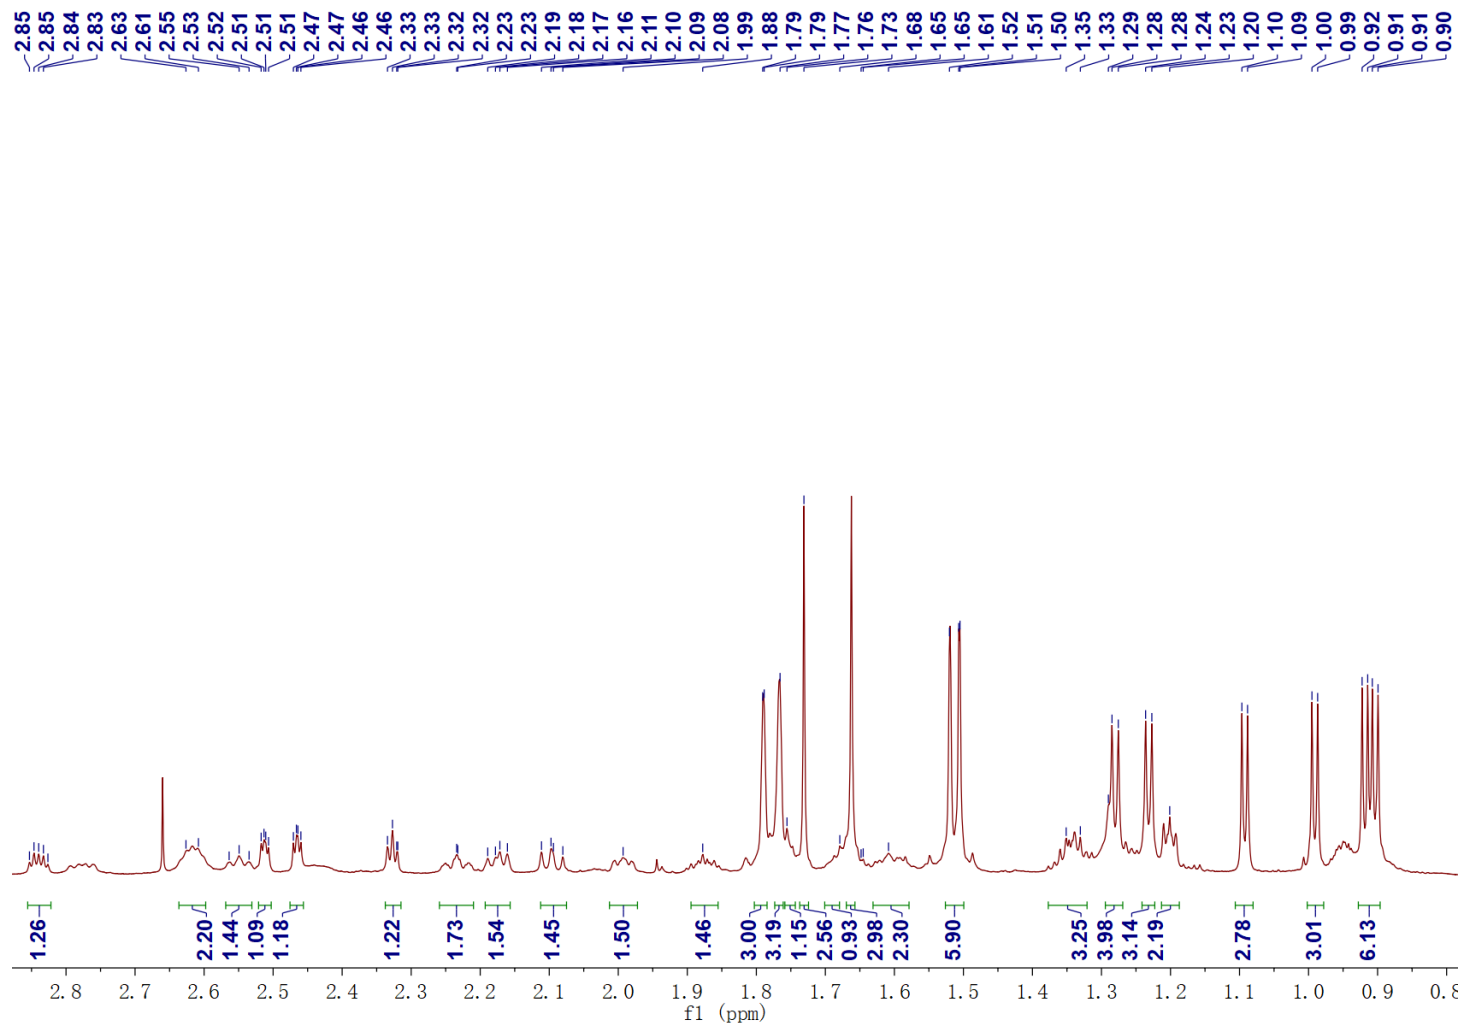

**Figure S29.** Enlarged  $^1\text{H}$  NMR spectrum (3.0 ~ 0.8 ppm) of compound **3**

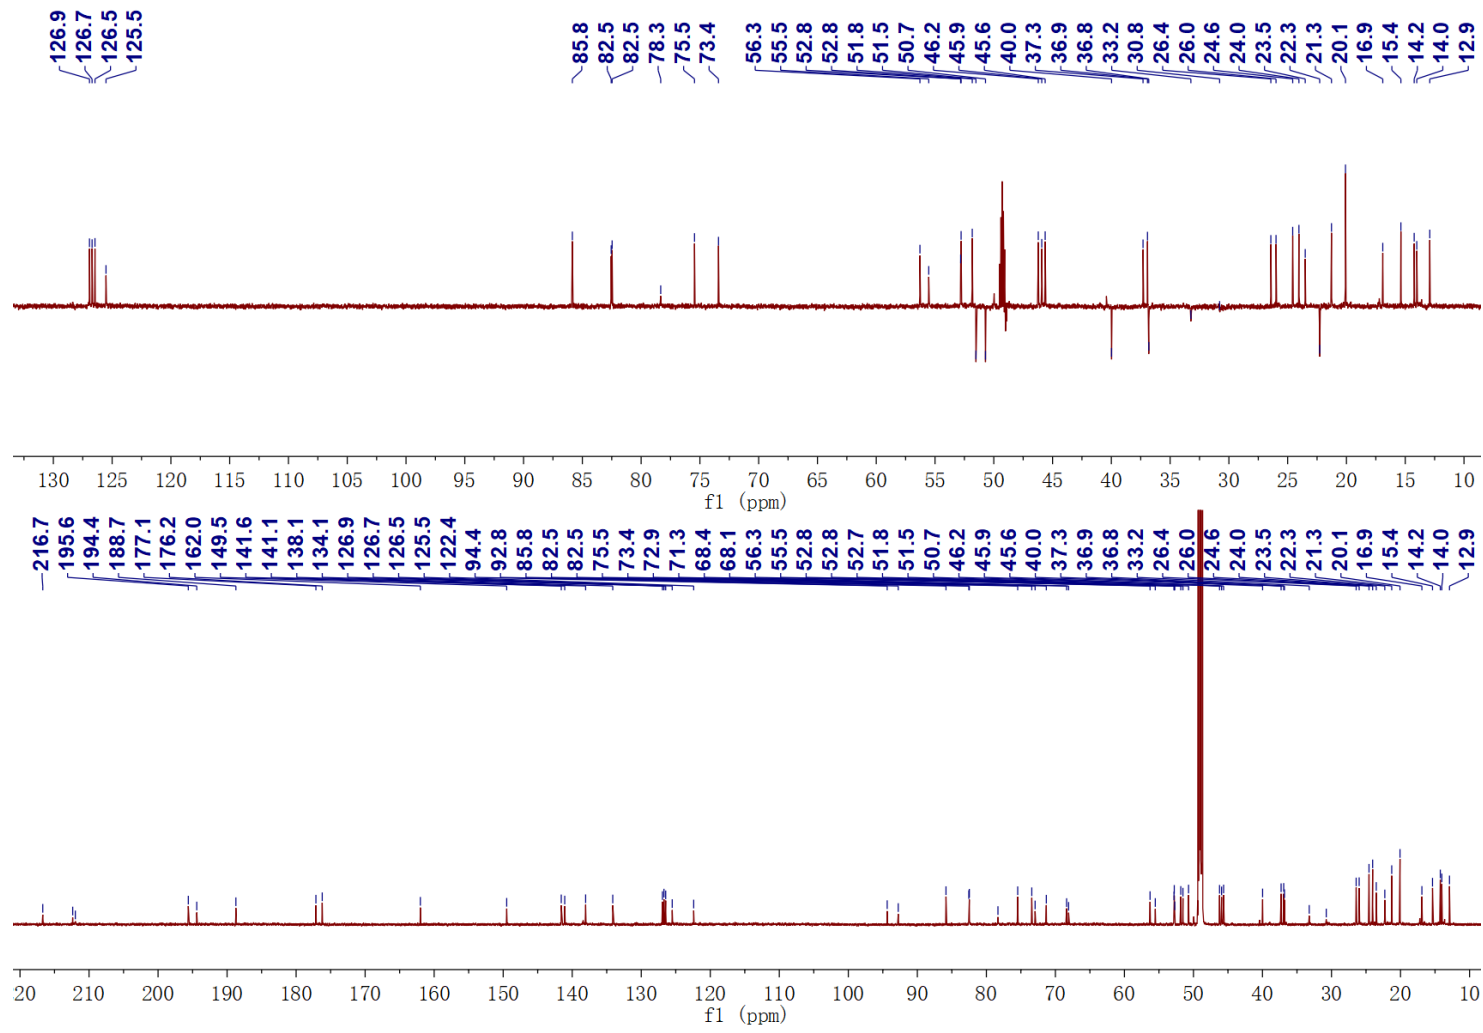

Figure S30. <sup>13</sup>C NMR of compound 3 (in CD<sub>3</sub>OD)

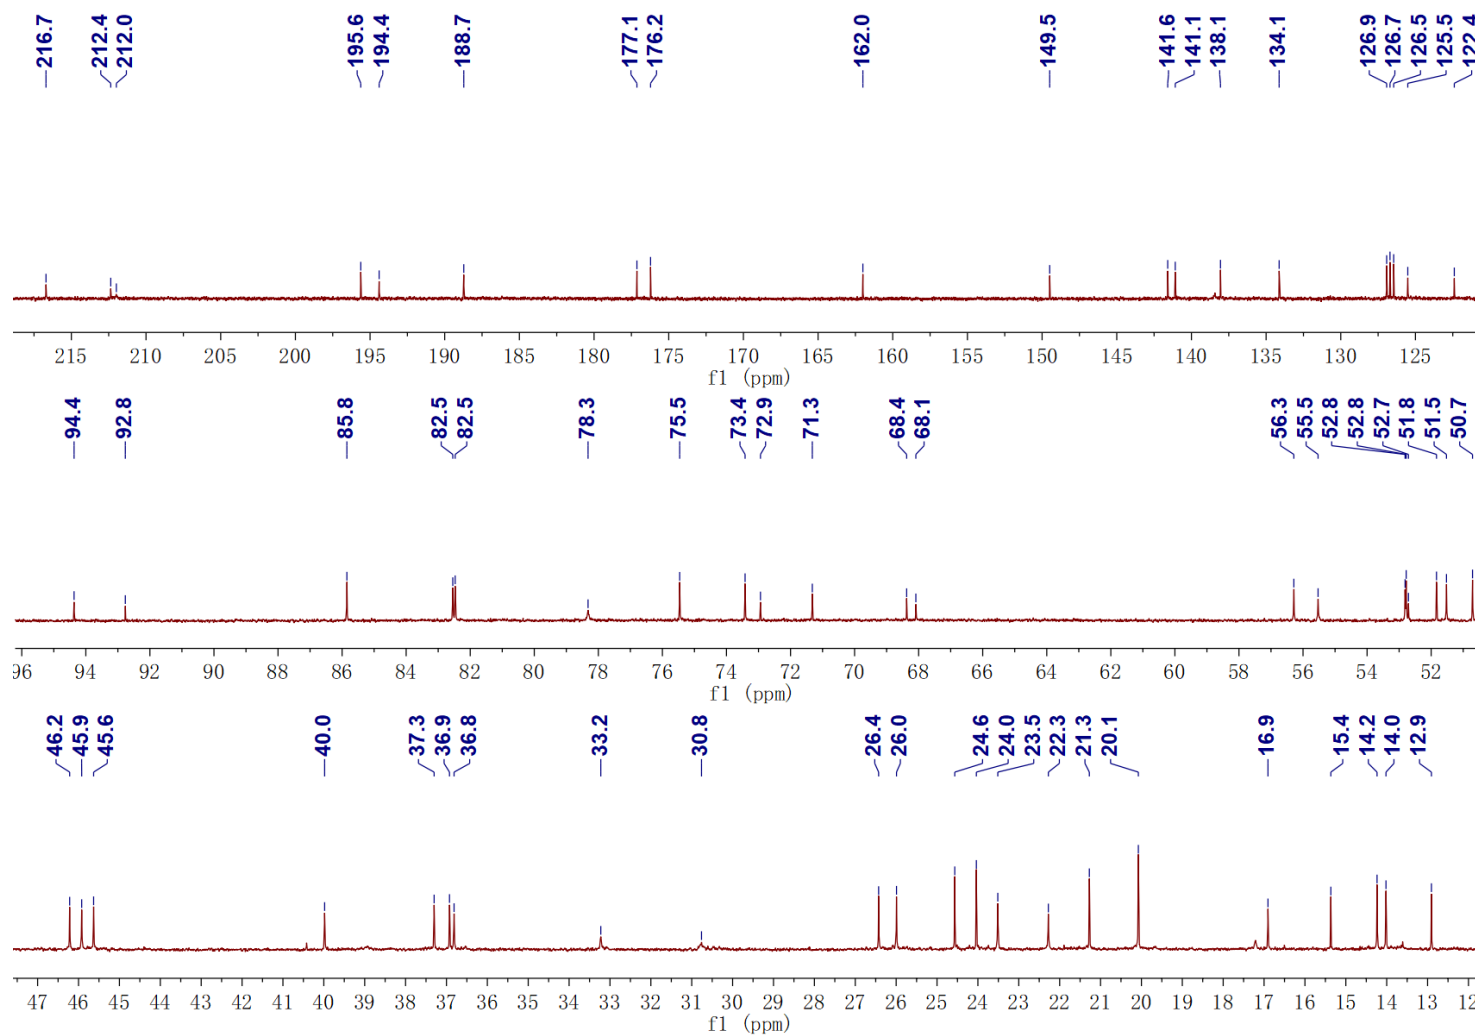

Figure S31. Enlarged  $^{13}\text{C}$  NMR spectrum of compound 3

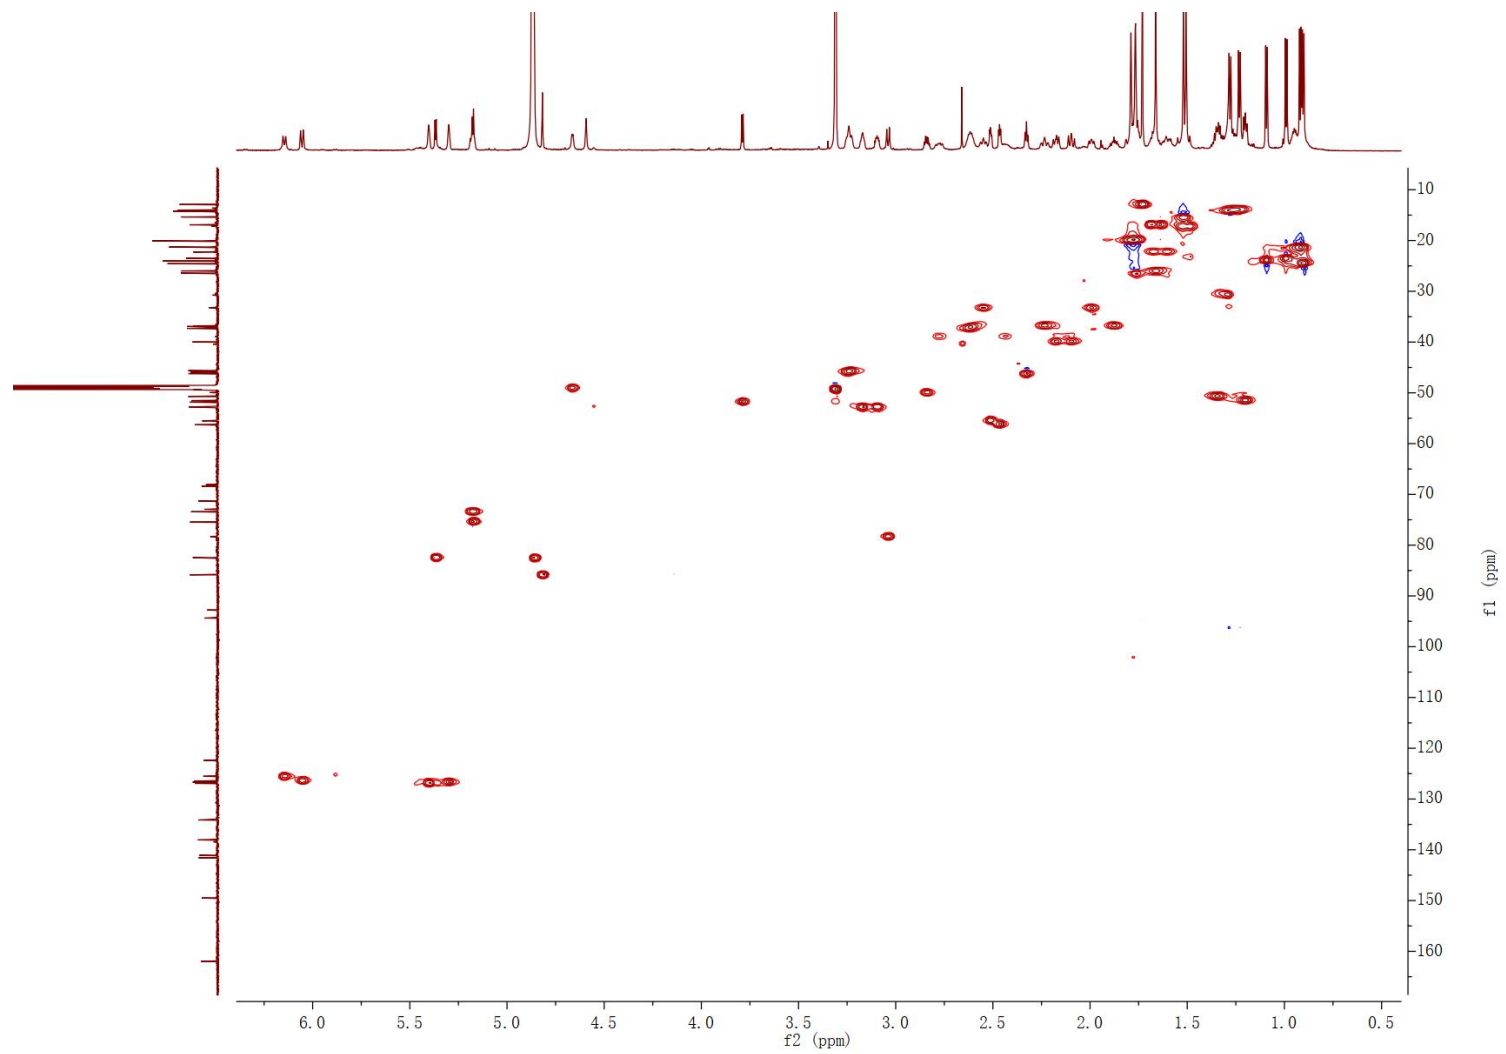

**Figure S32.** HSQC of compound **3** (in CD<sub>3</sub>OD)



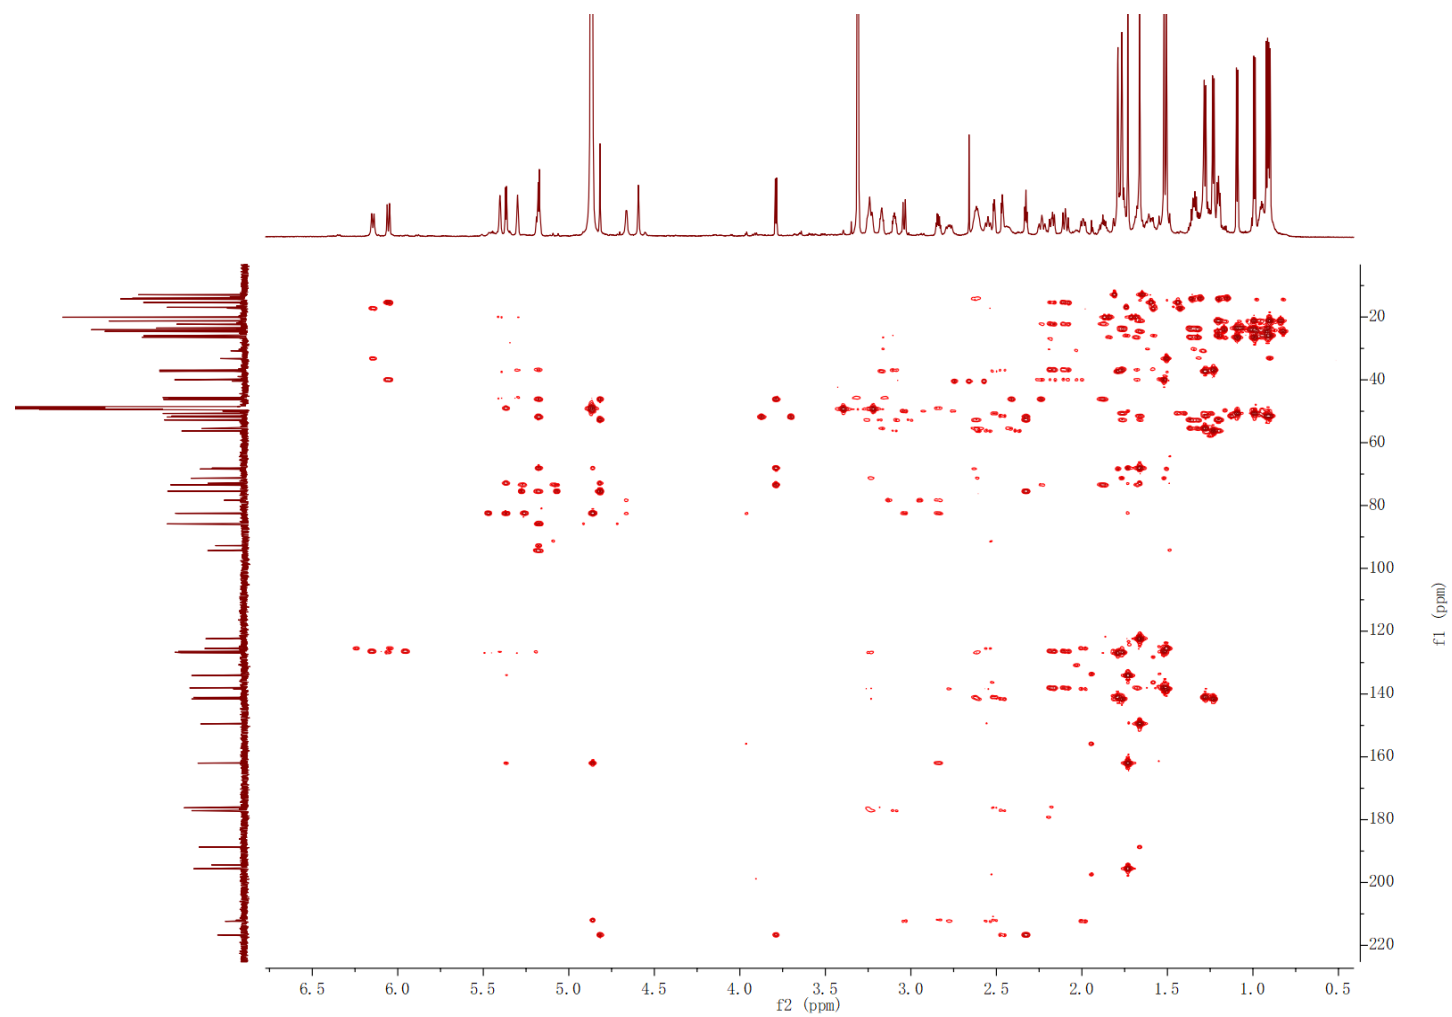

**Figure S33.** HMBC of compound **3** (in CD<sub>3</sub>OD)

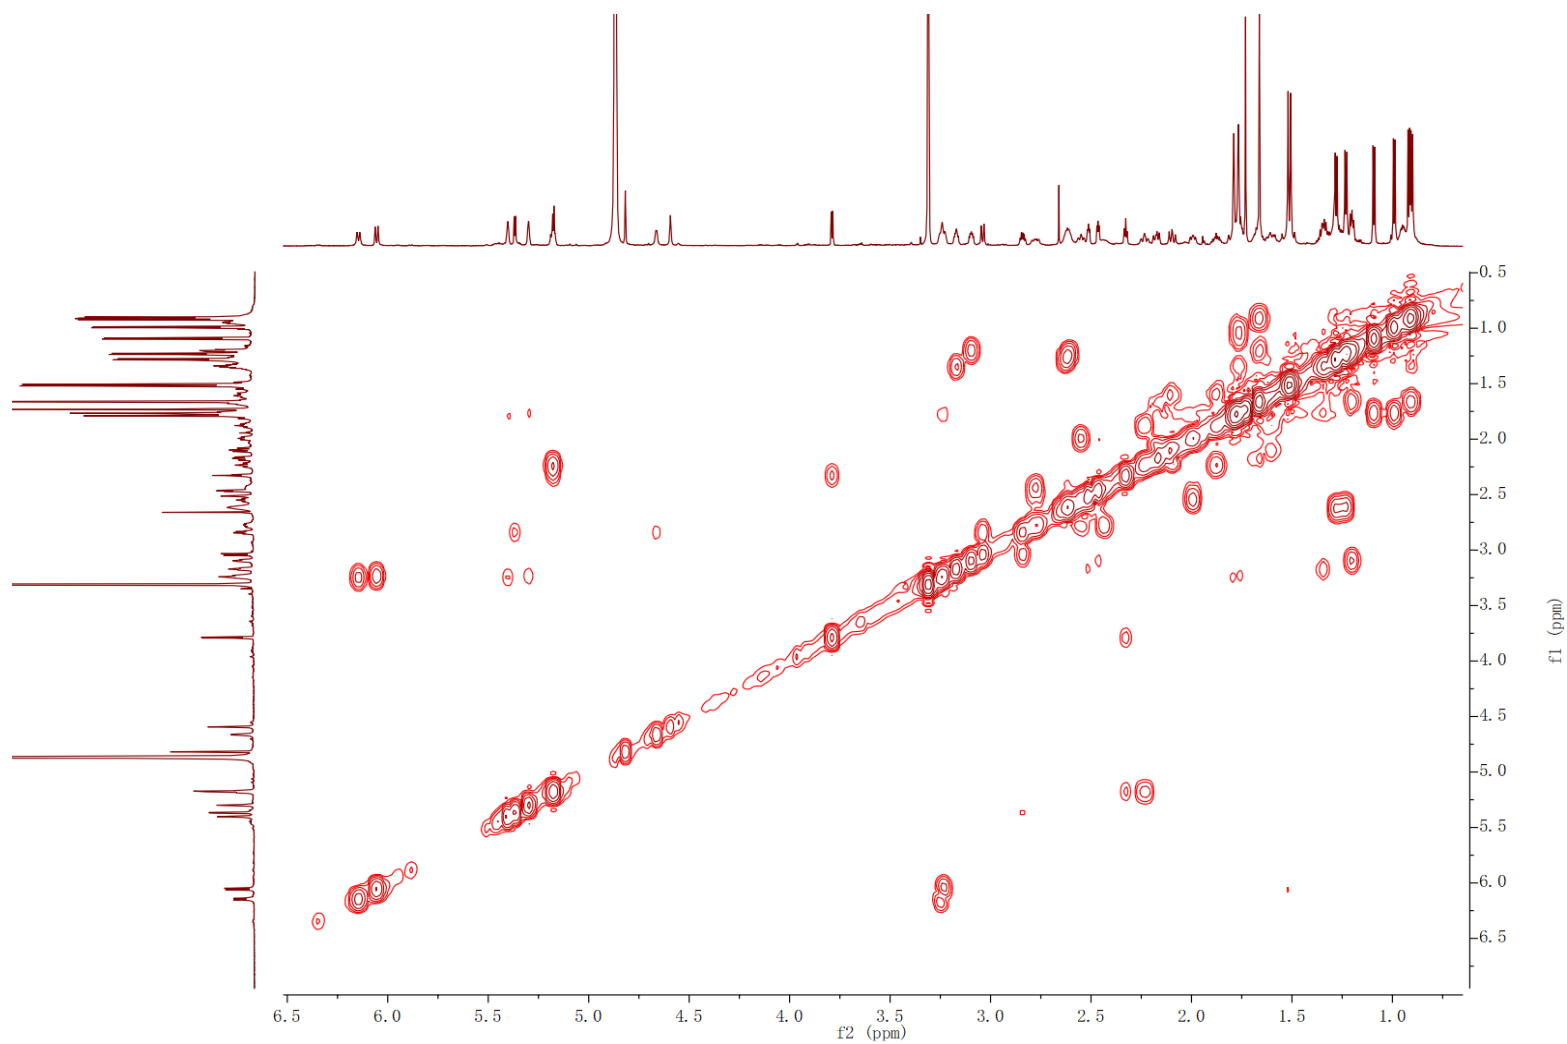

**Figure S34.**  $^1\text{H}$ - $^1\text{H}$  COSY of compound **3** (in  $\text{CD}_3\text{OD}$ )

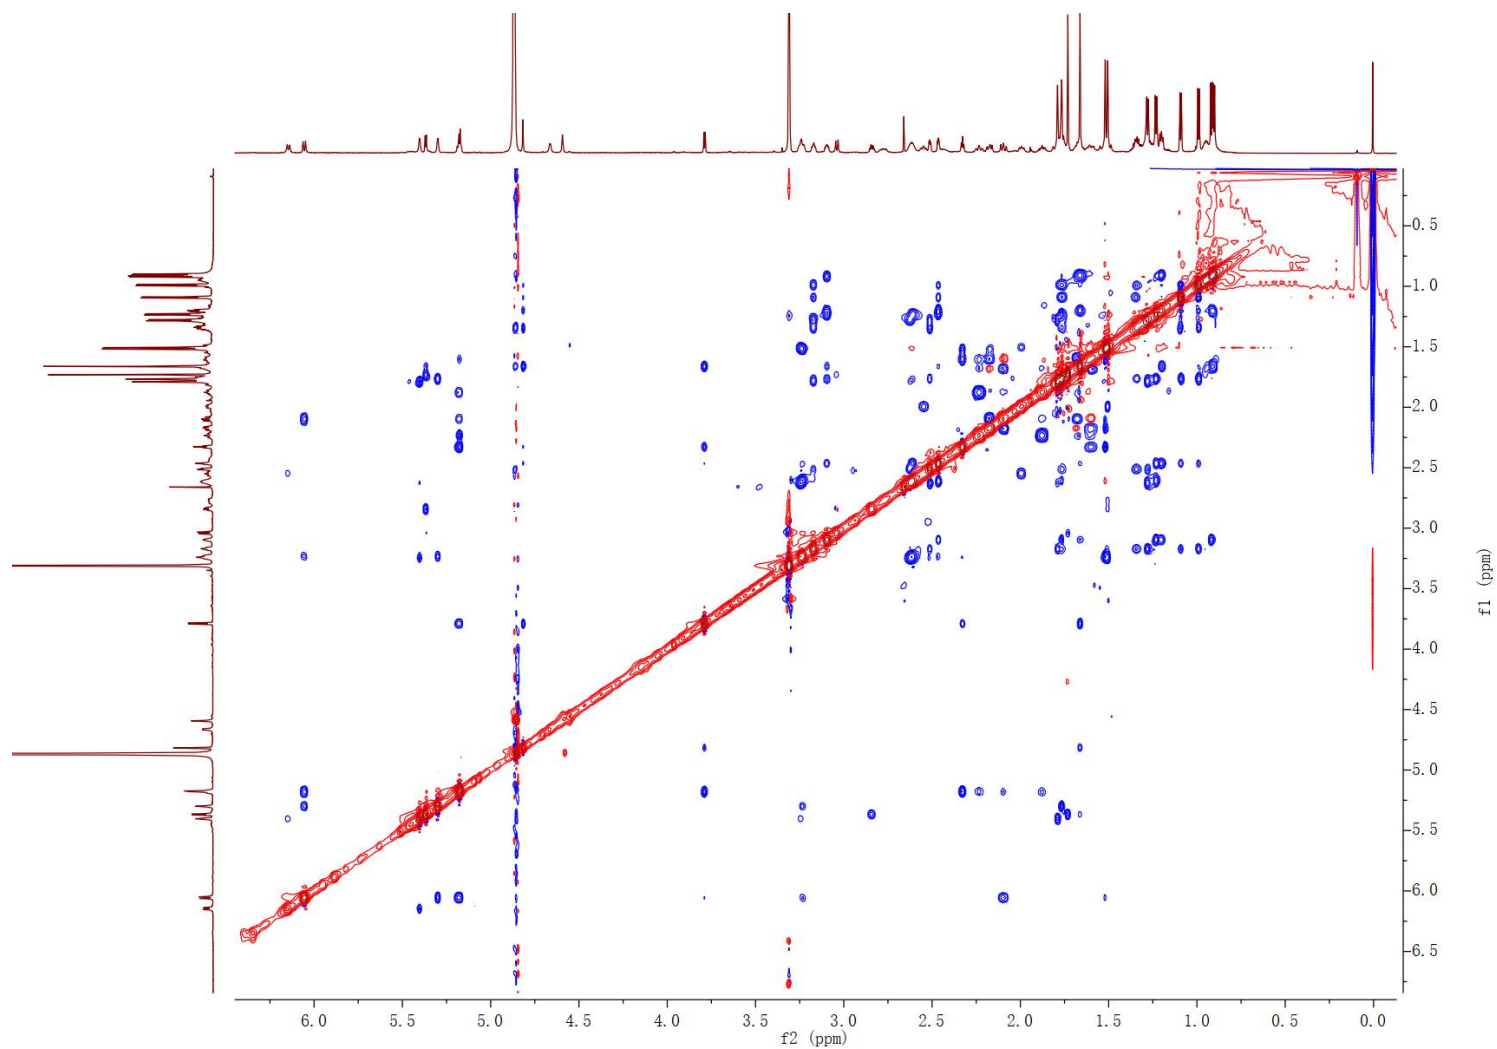

**Figure S35.** ROESY of compound **3** (in CD<sub>3</sub>OD)

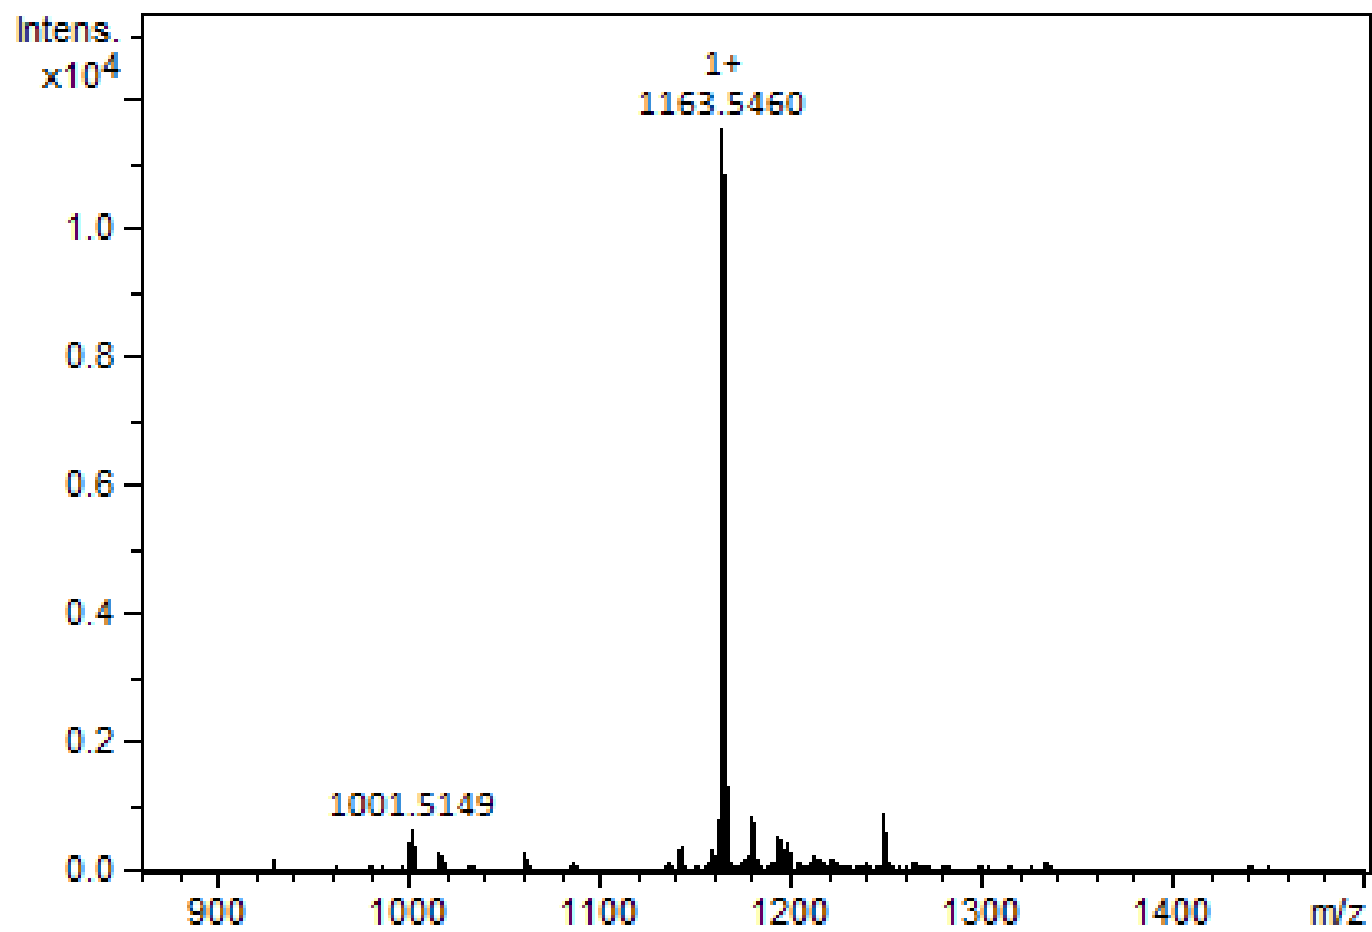

Figure S36. HRESIMS of compound 3

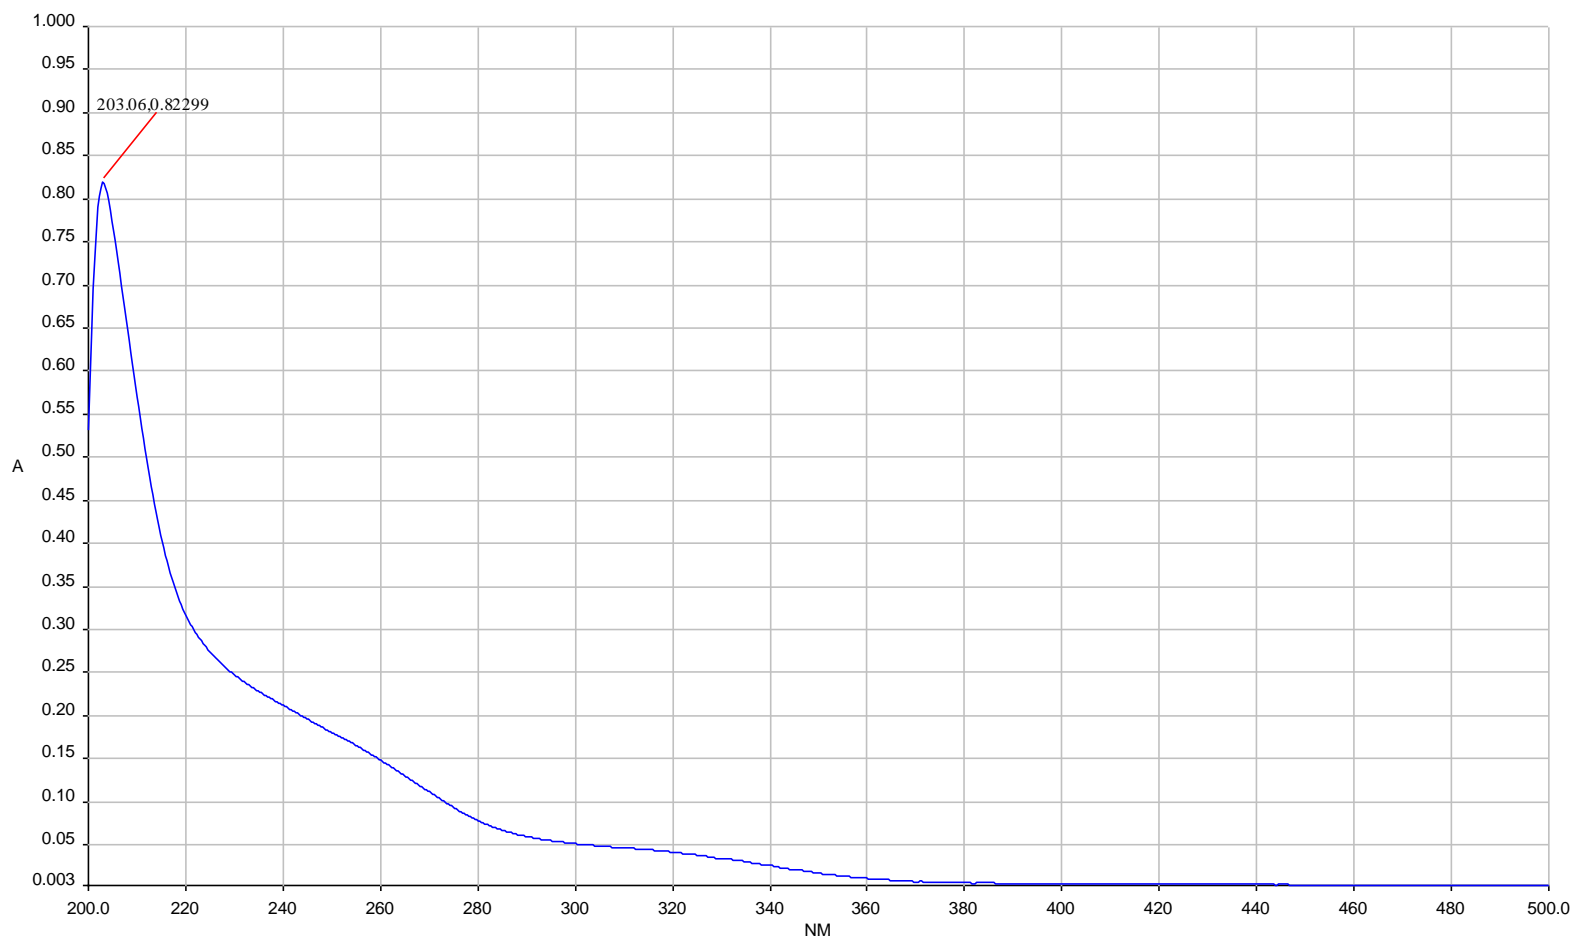

**Figure S37.** UV of compound **3**

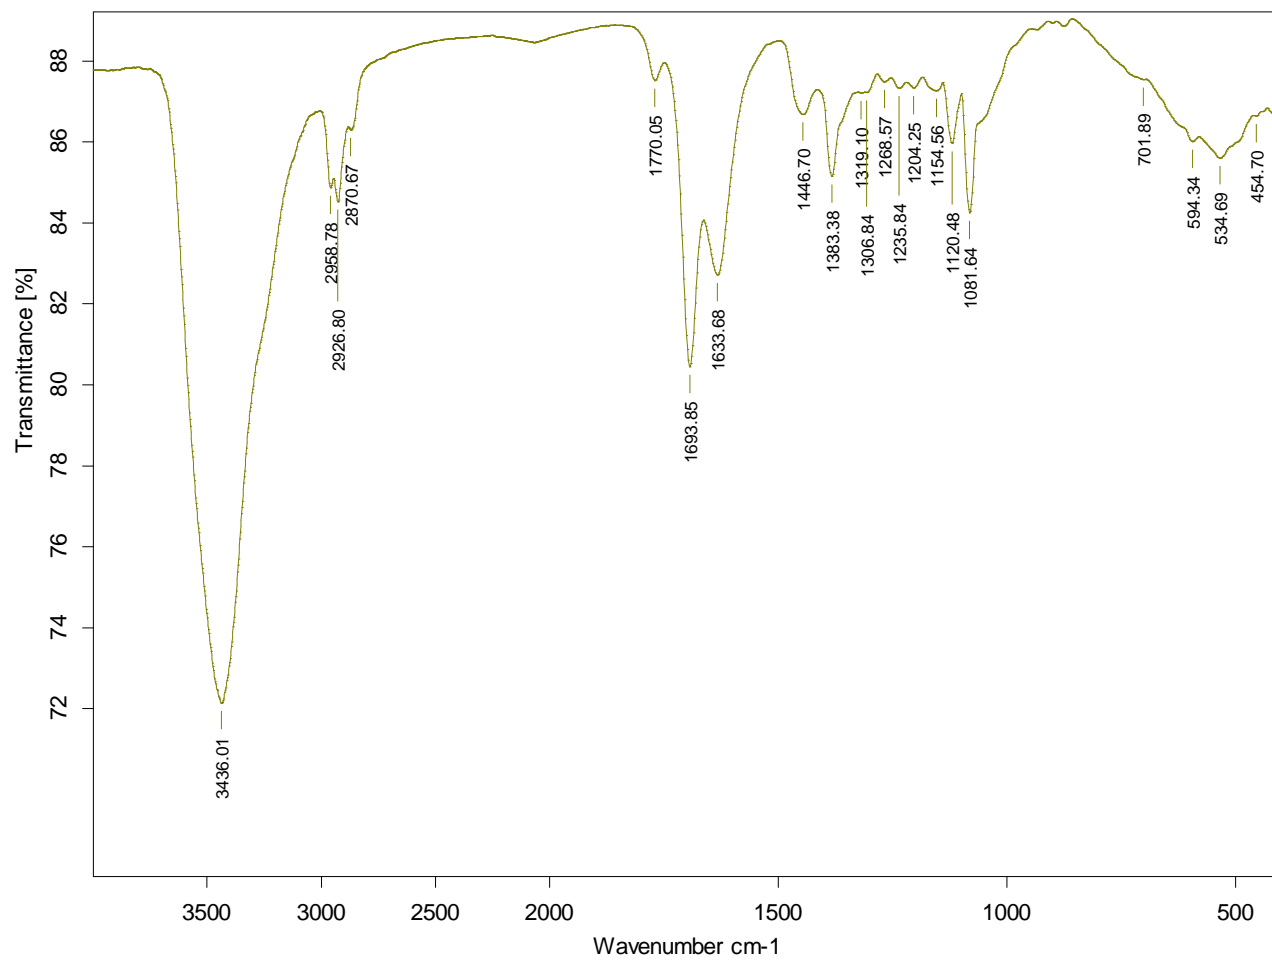

**Figure S38.** IR of compound **3**

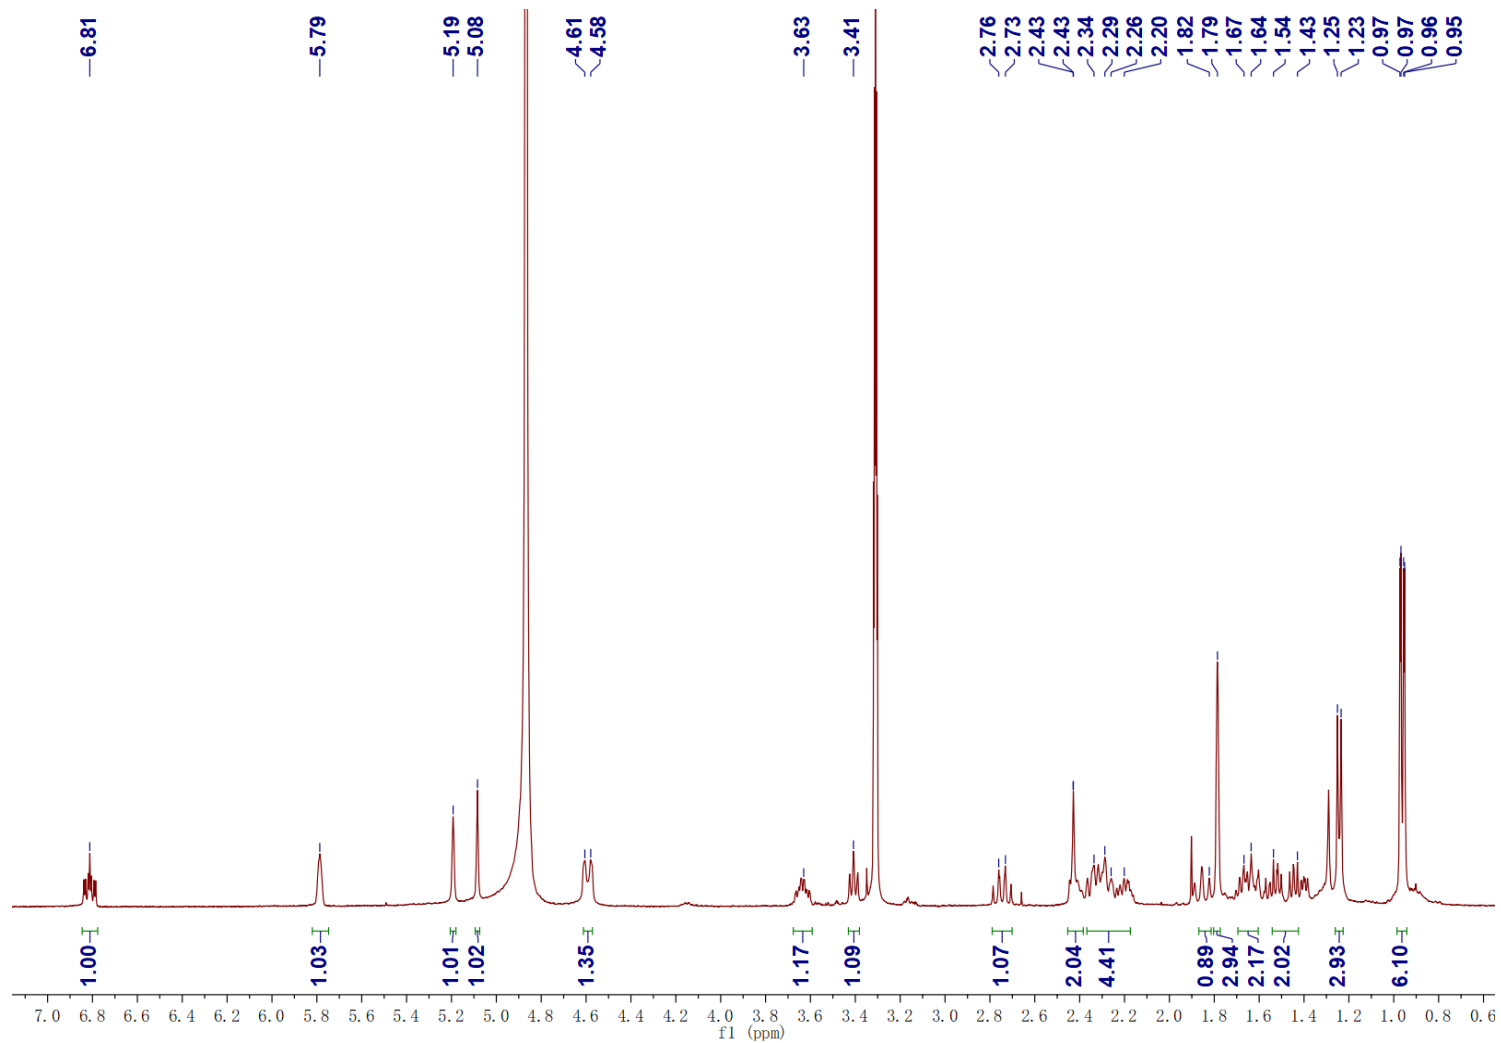

Figure S39.  $^1\text{H}$  NMR of compound 4 (in  $\text{CD}_3\text{OD}$ )

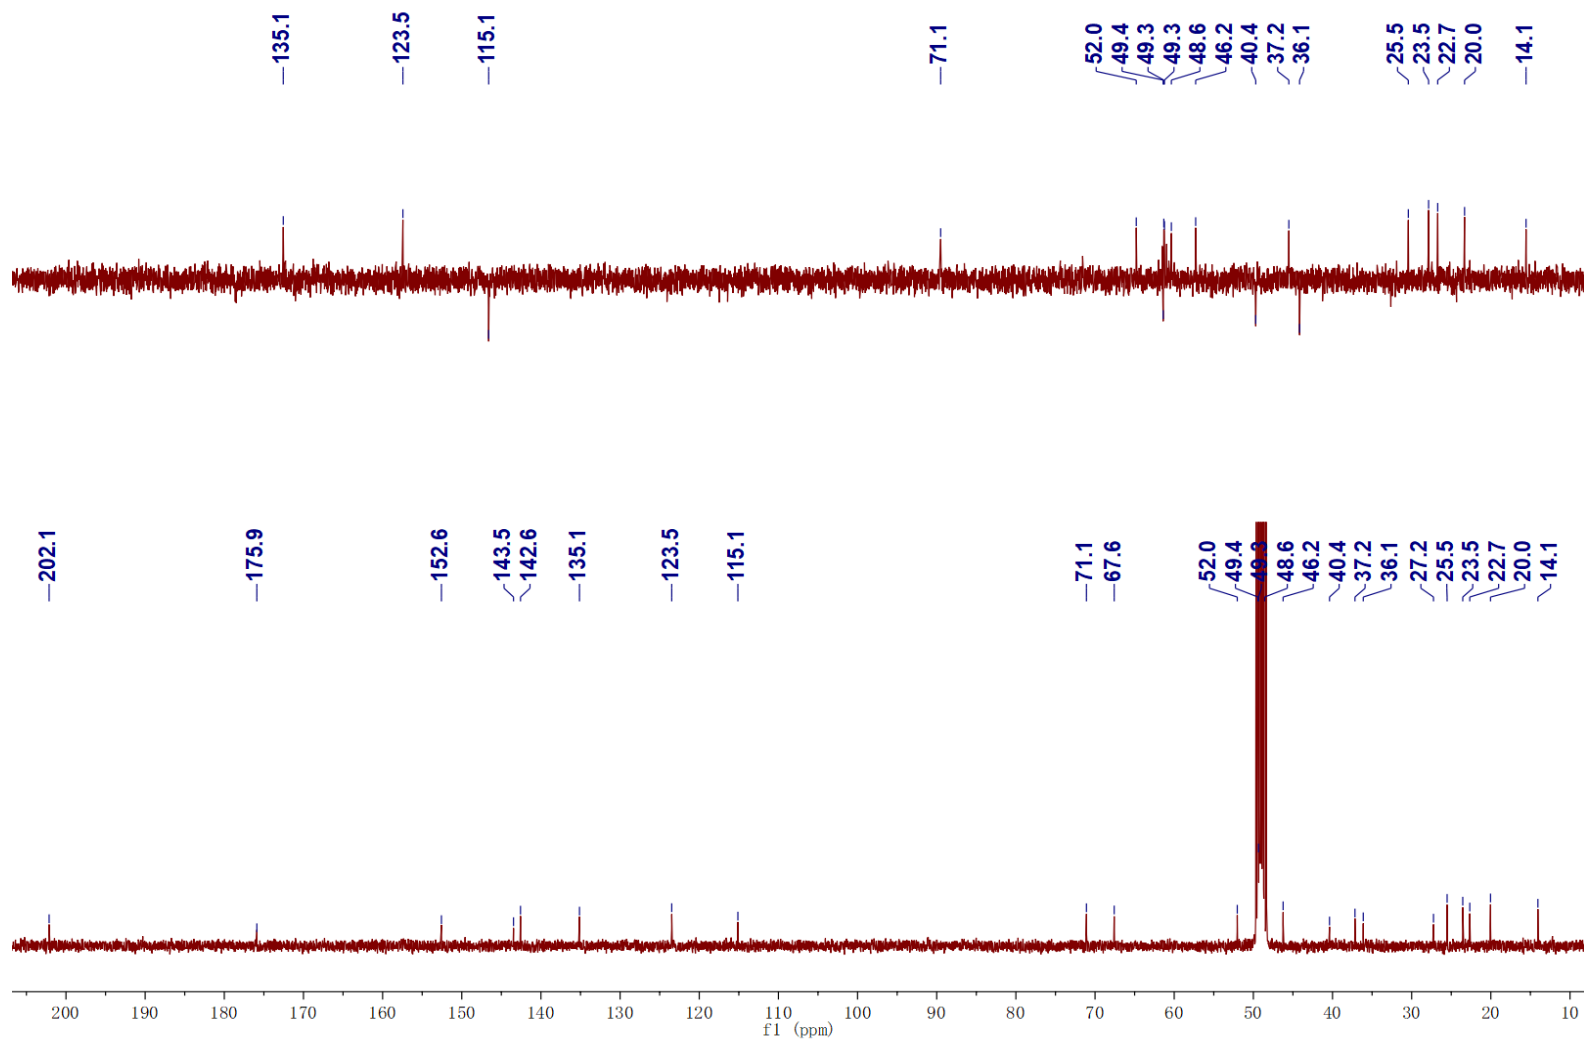

Figure S40.  $^{13}\text{C}$  NMR of compound 4 (in  $\text{CD}_3\text{OD}$ )



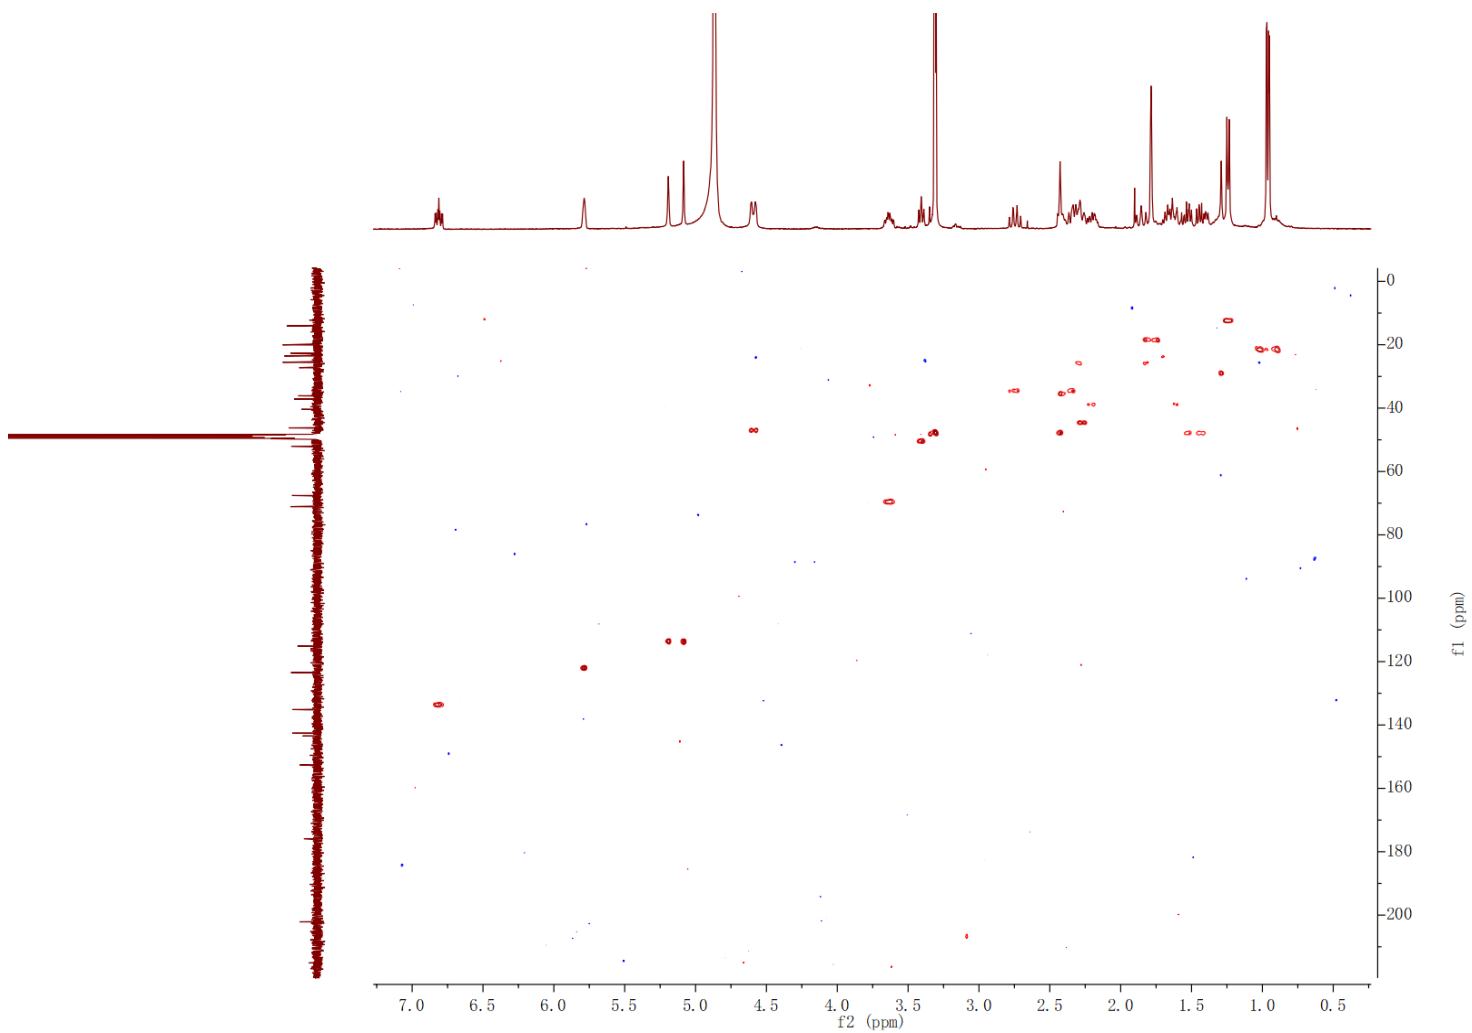

**Figure S41.** HSQC of compound **4** (in CD<sub>3</sub>OD)

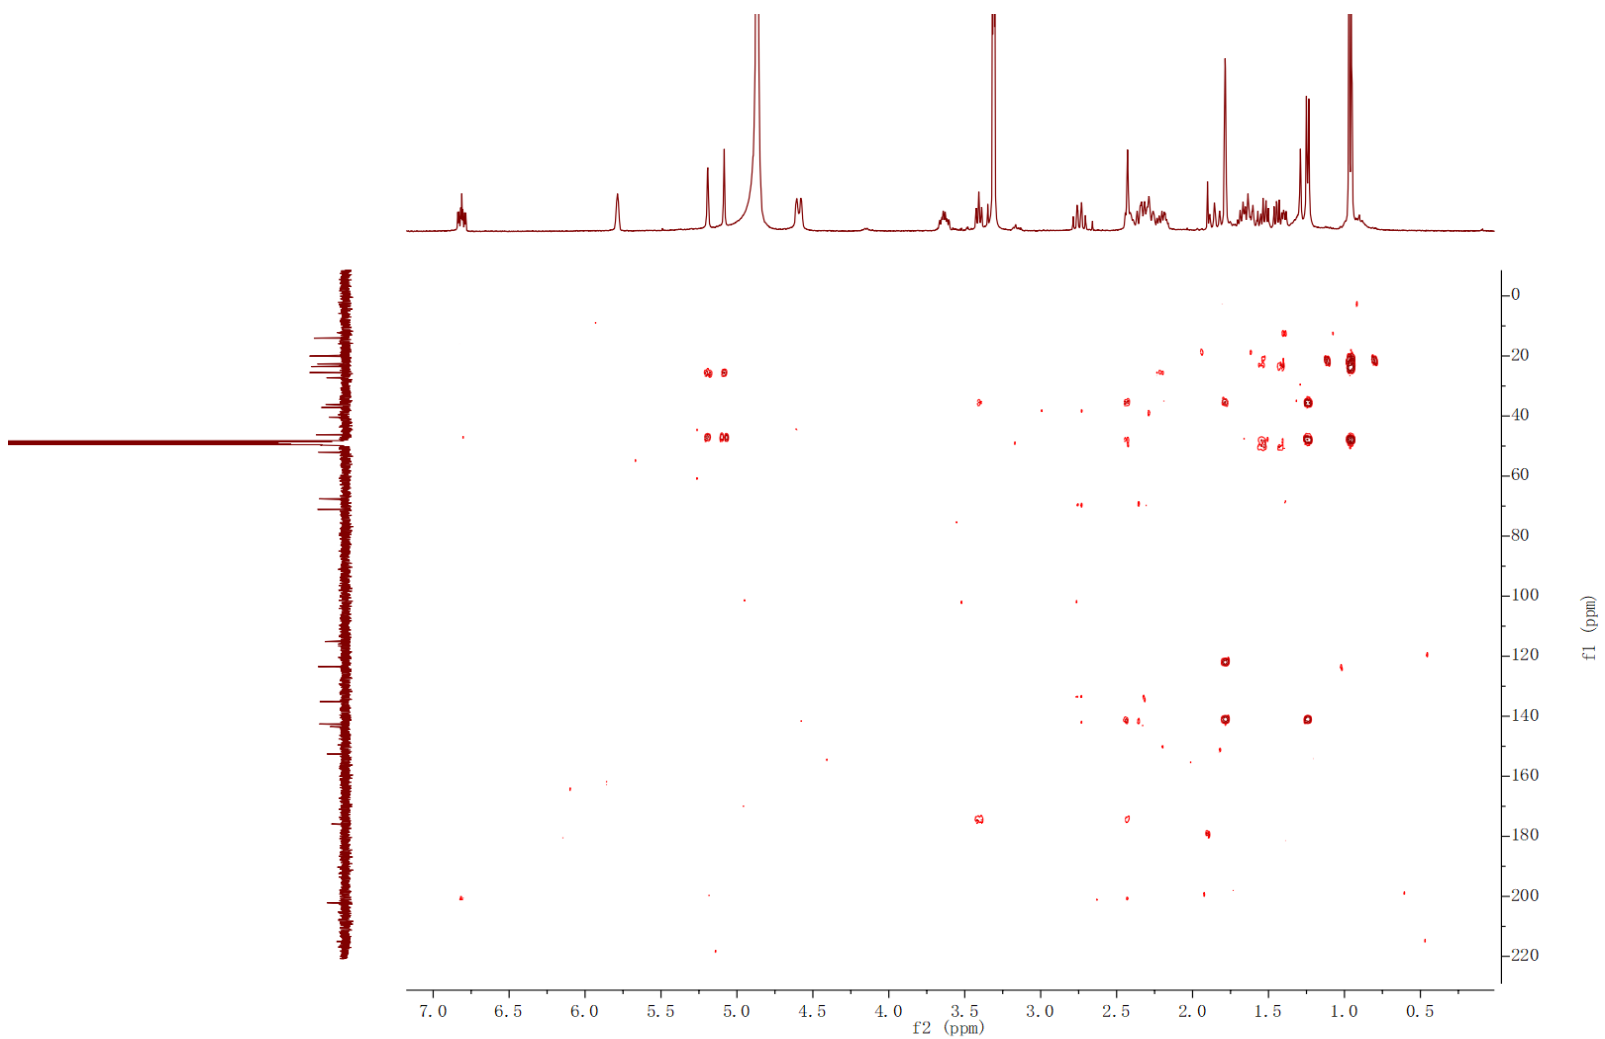

**Figure S42.** HMBC of compound 4 (in CD<sub>3</sub>OD)

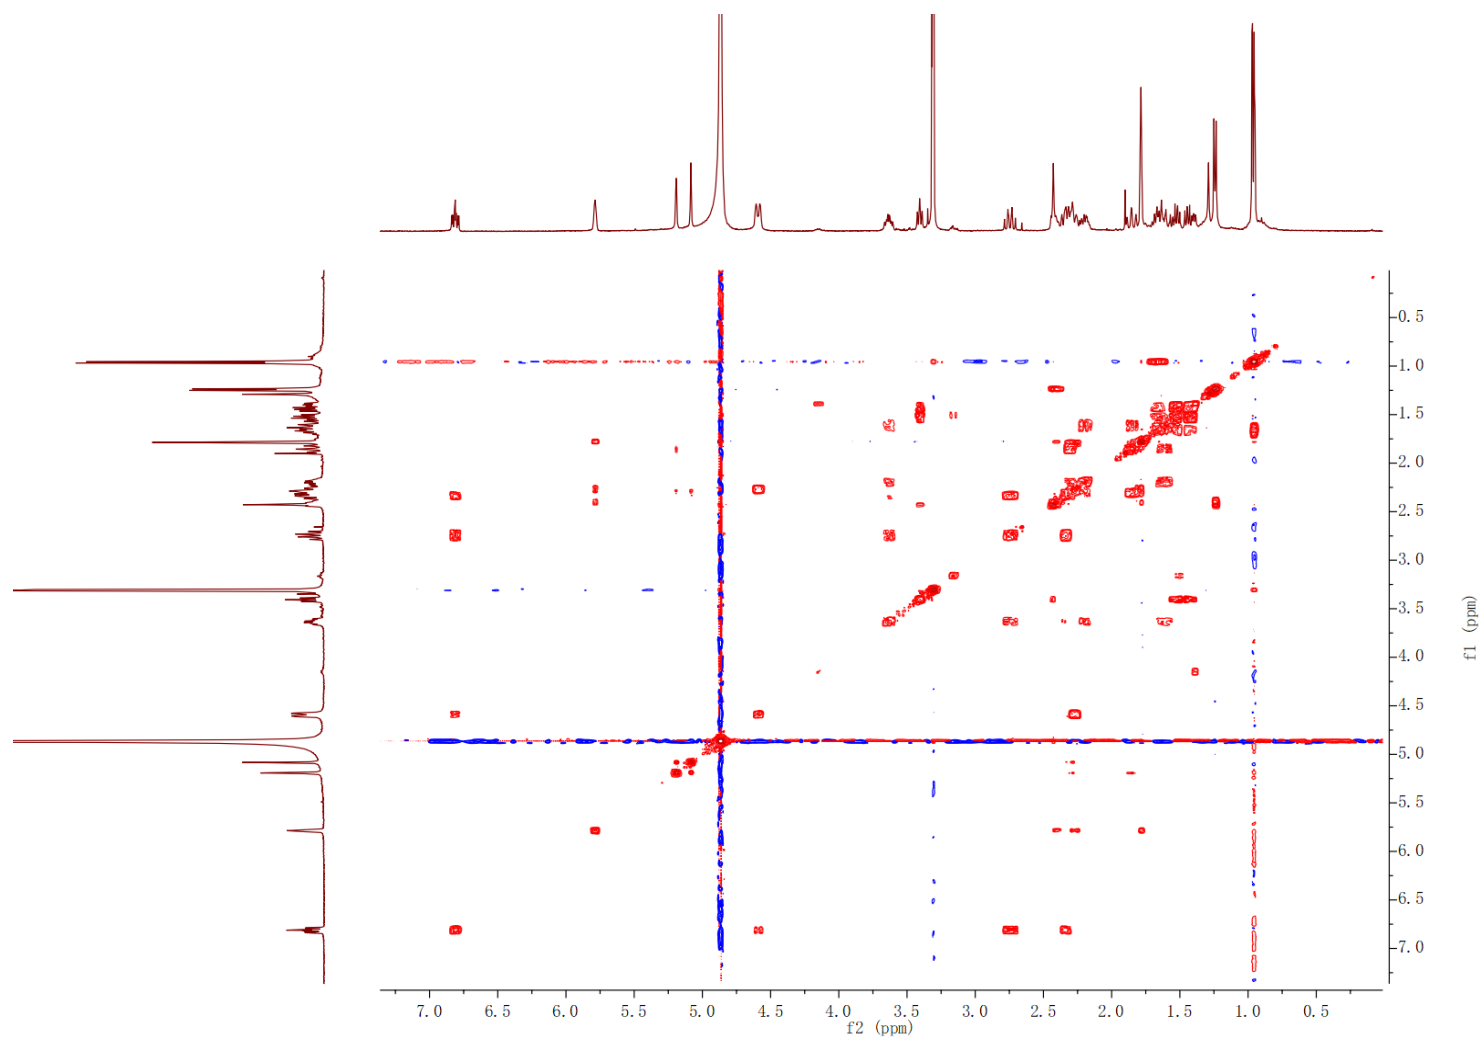

**Figure S43.**  $^1\text{H}$ - $^1\text{H}$  COSY of compound 4 (in  $\text{CD}_3\text{OD}$ )

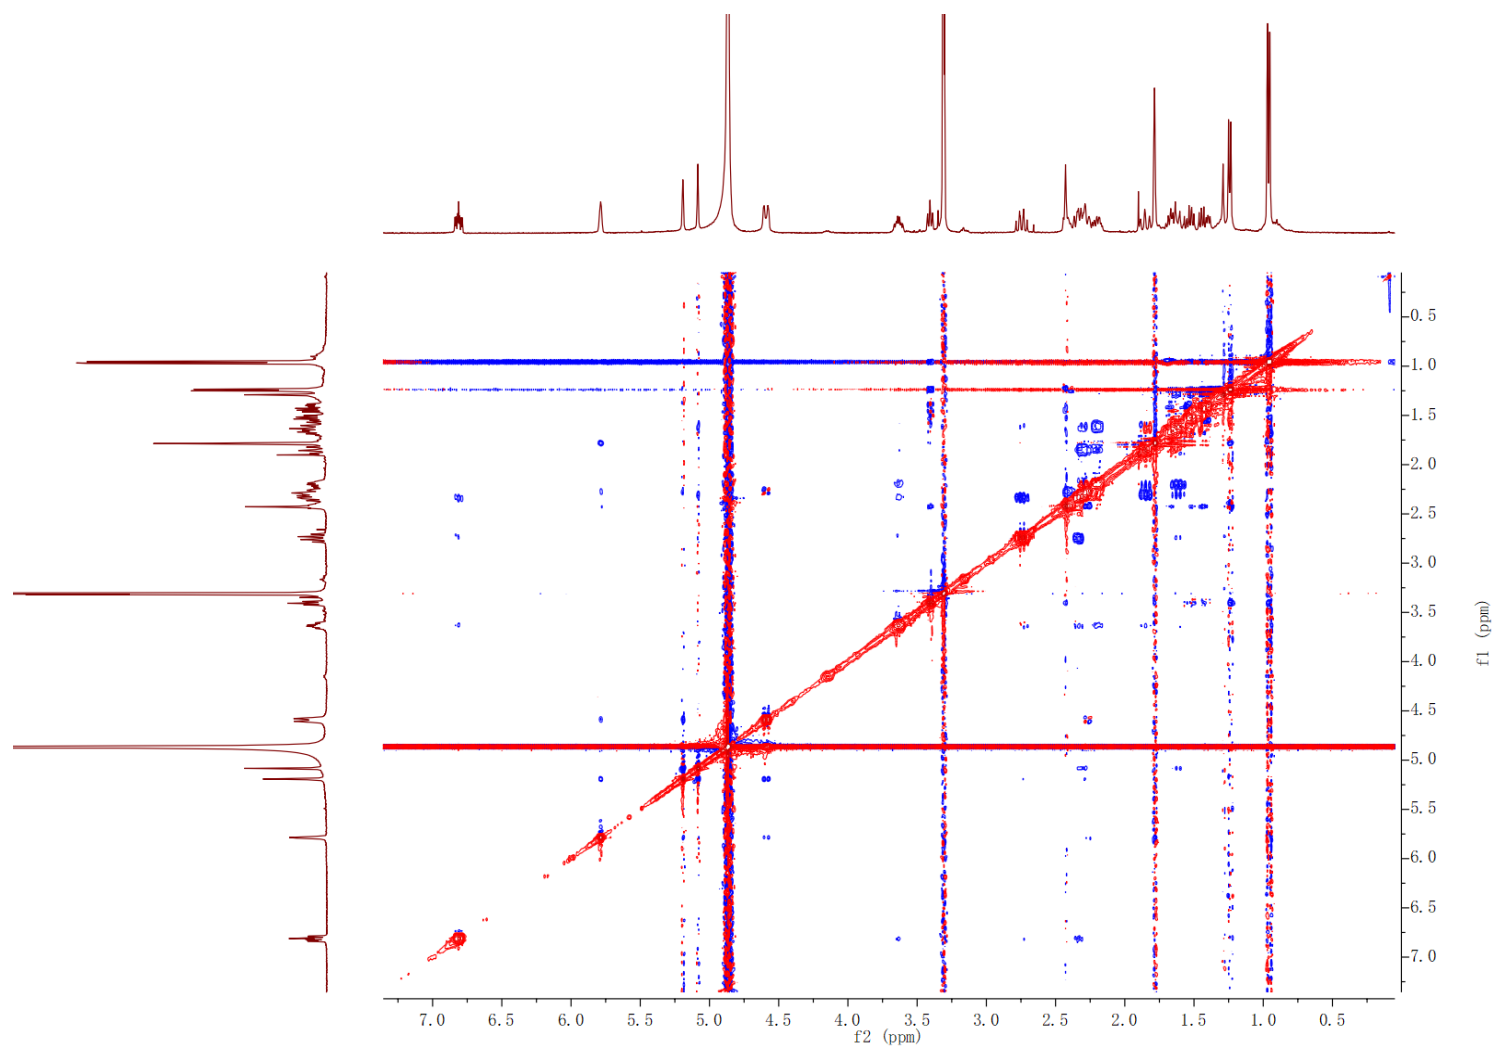

**Figure S44.** NOESY of compound **4** (in CD<sub>3</sub>OD)

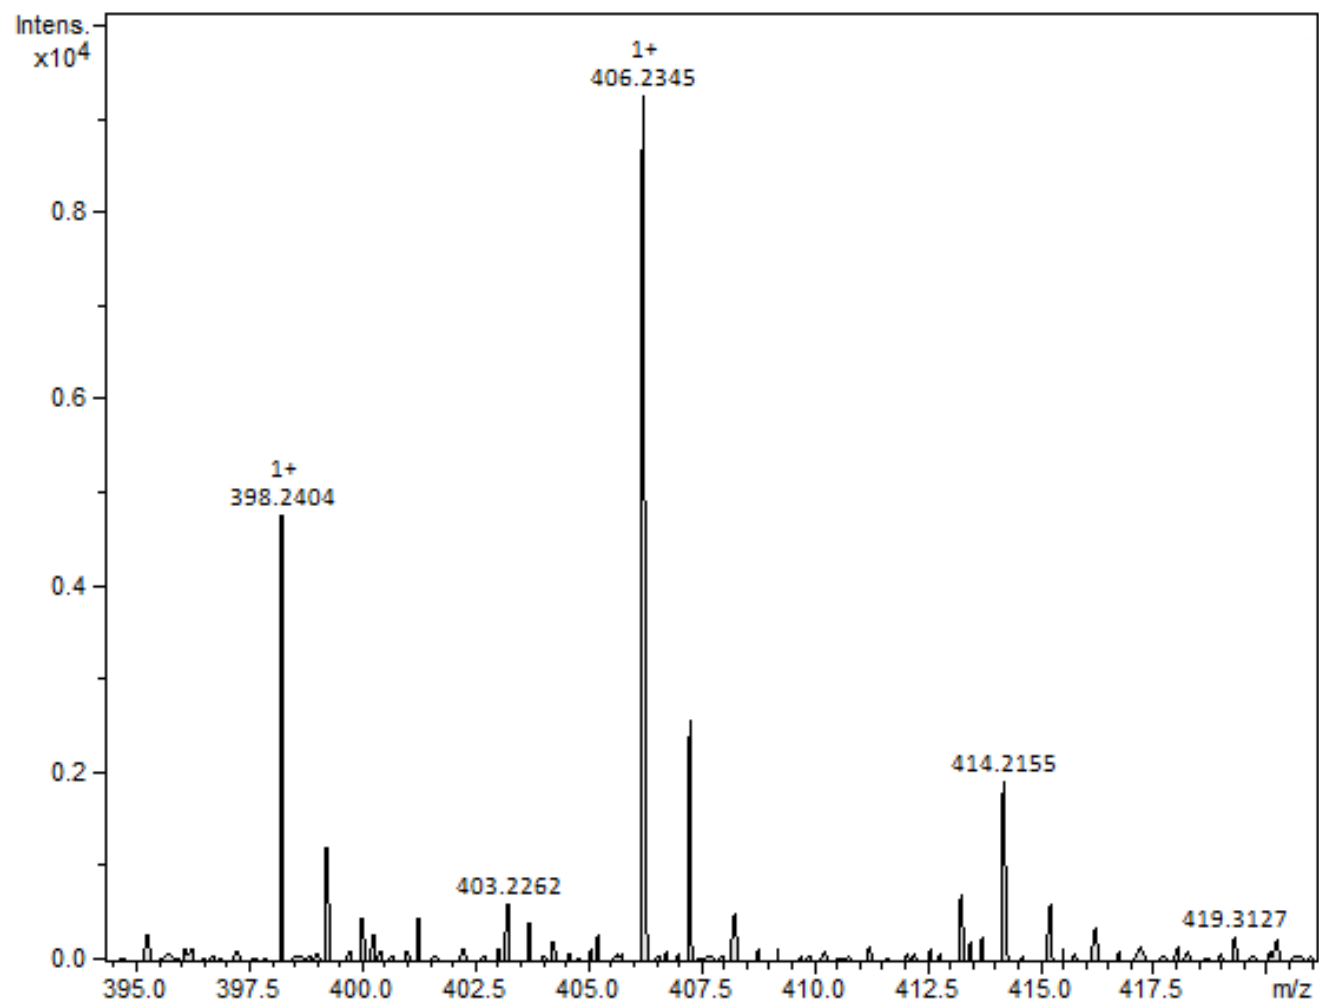

Figure S45. HRESIMS of compound 4

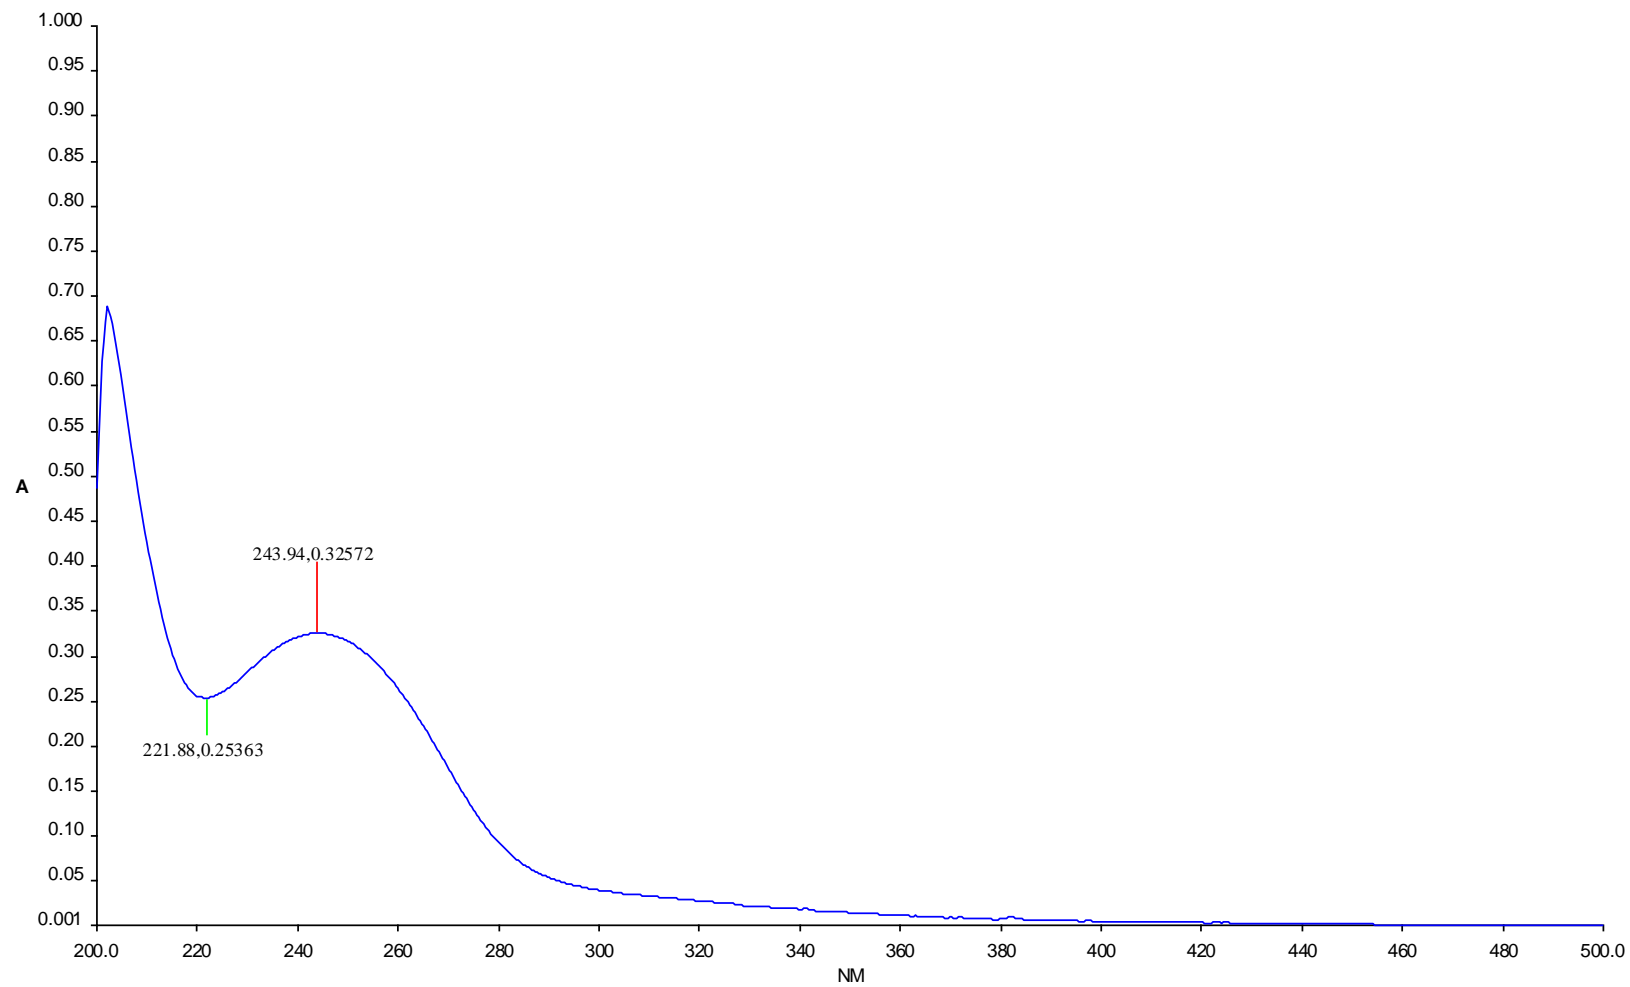

**Figure S46.** UV of compound 4

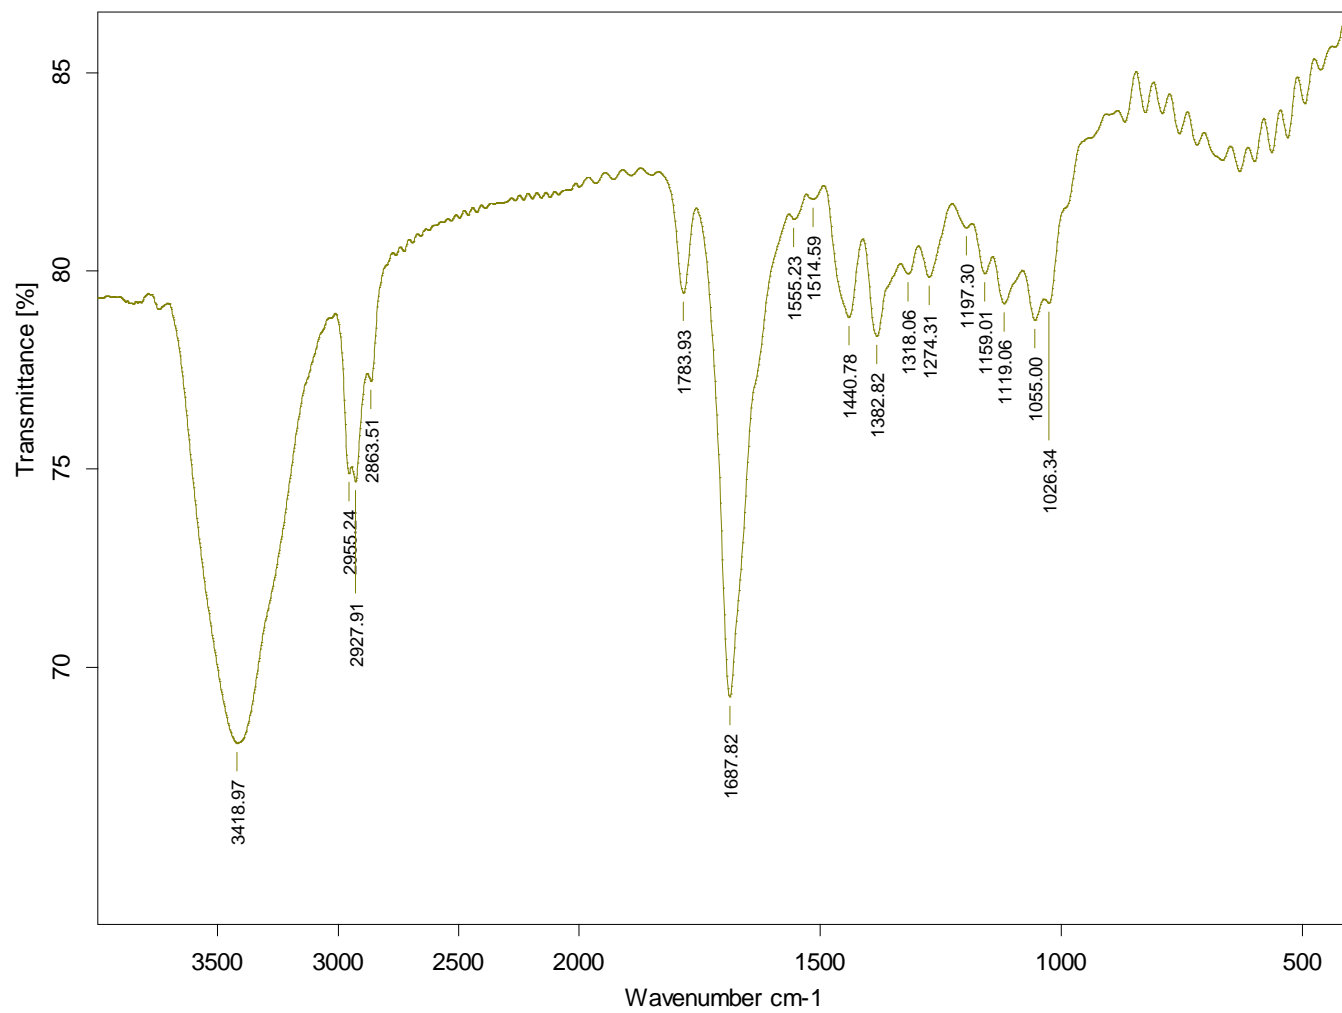

**Figure S47.** IR of compound 4

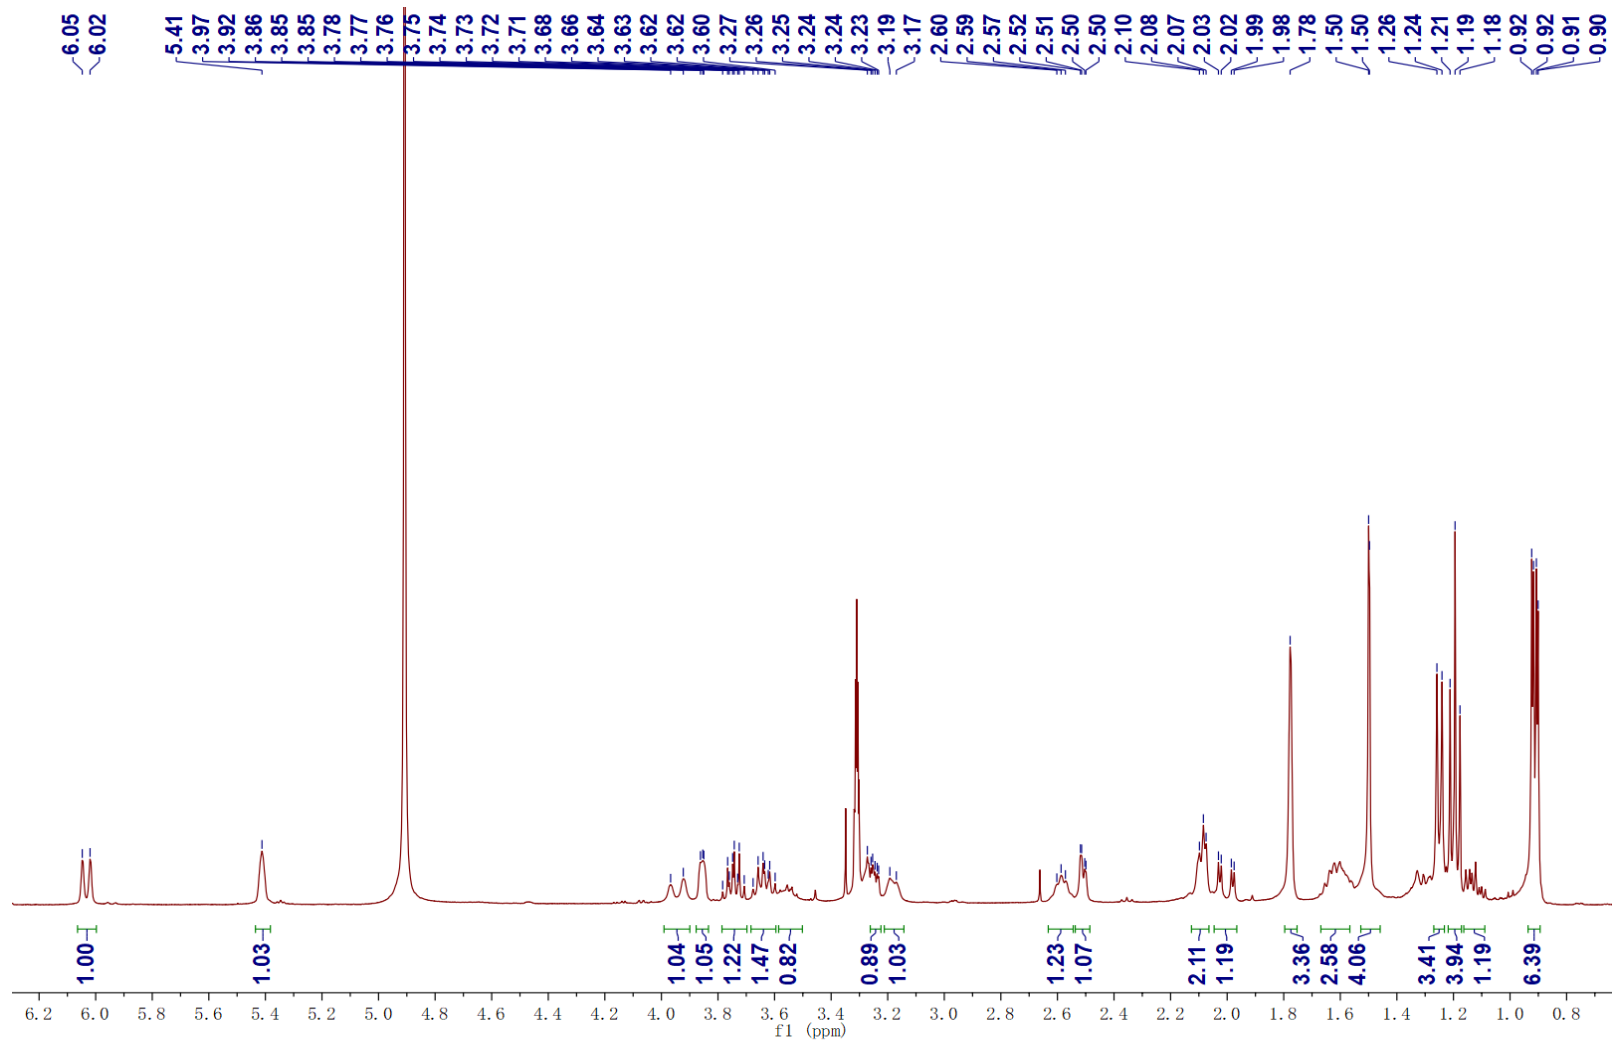

Figure S48.  $^1\text{H}$  NMR of compound **5** (in  $\text{CD}_3\text{OD}$ )



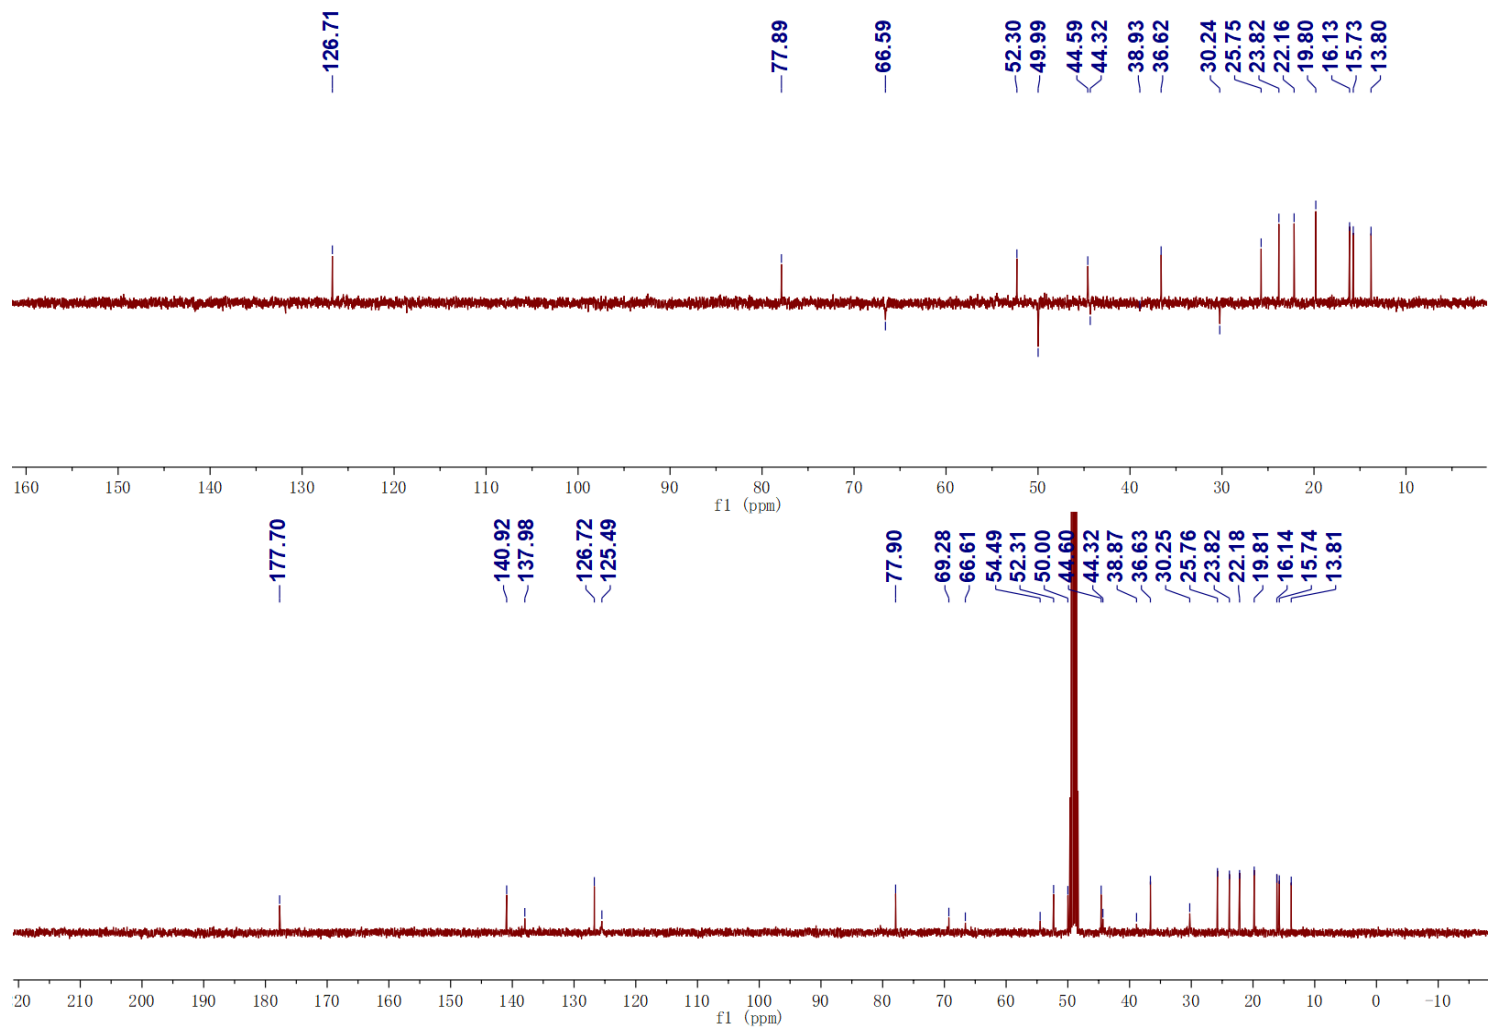

Figure S49. <sup>13</sup>C NMR of compound 5 (in CD<sub>3</sub>OD)

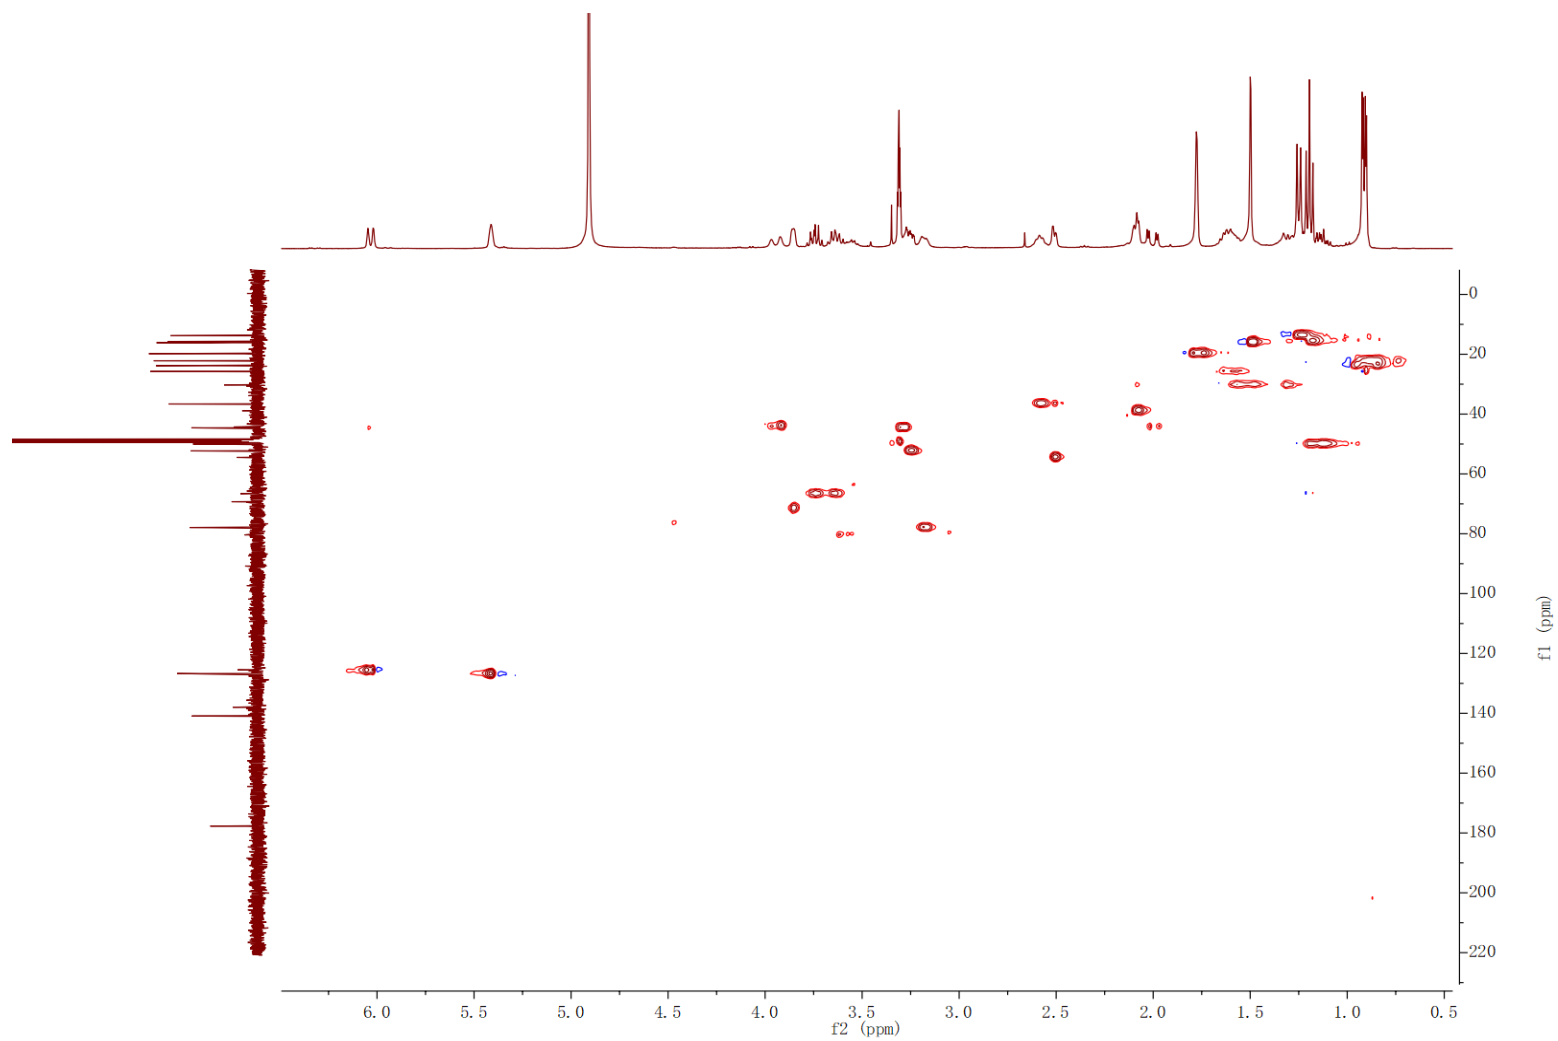

**Figure S50.** HSQC of compound **5** (in CD<sub>3</sub>OD)

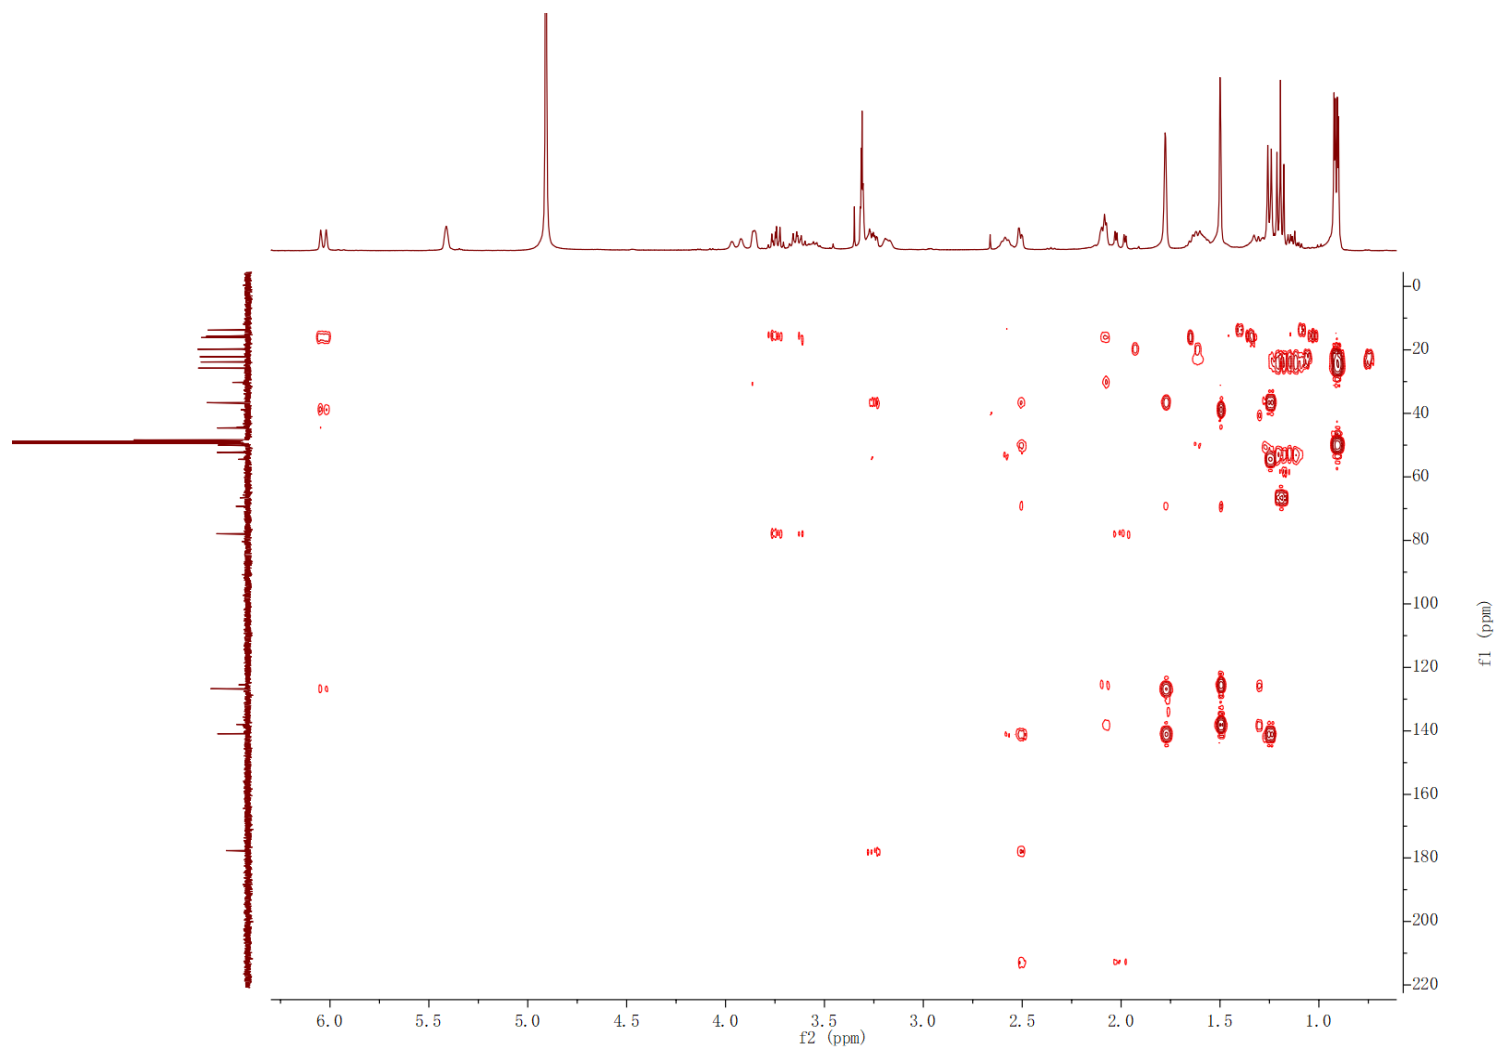

**Figure S51.** HMBC of compound **5** (in CD<sub>3</sub>OD)

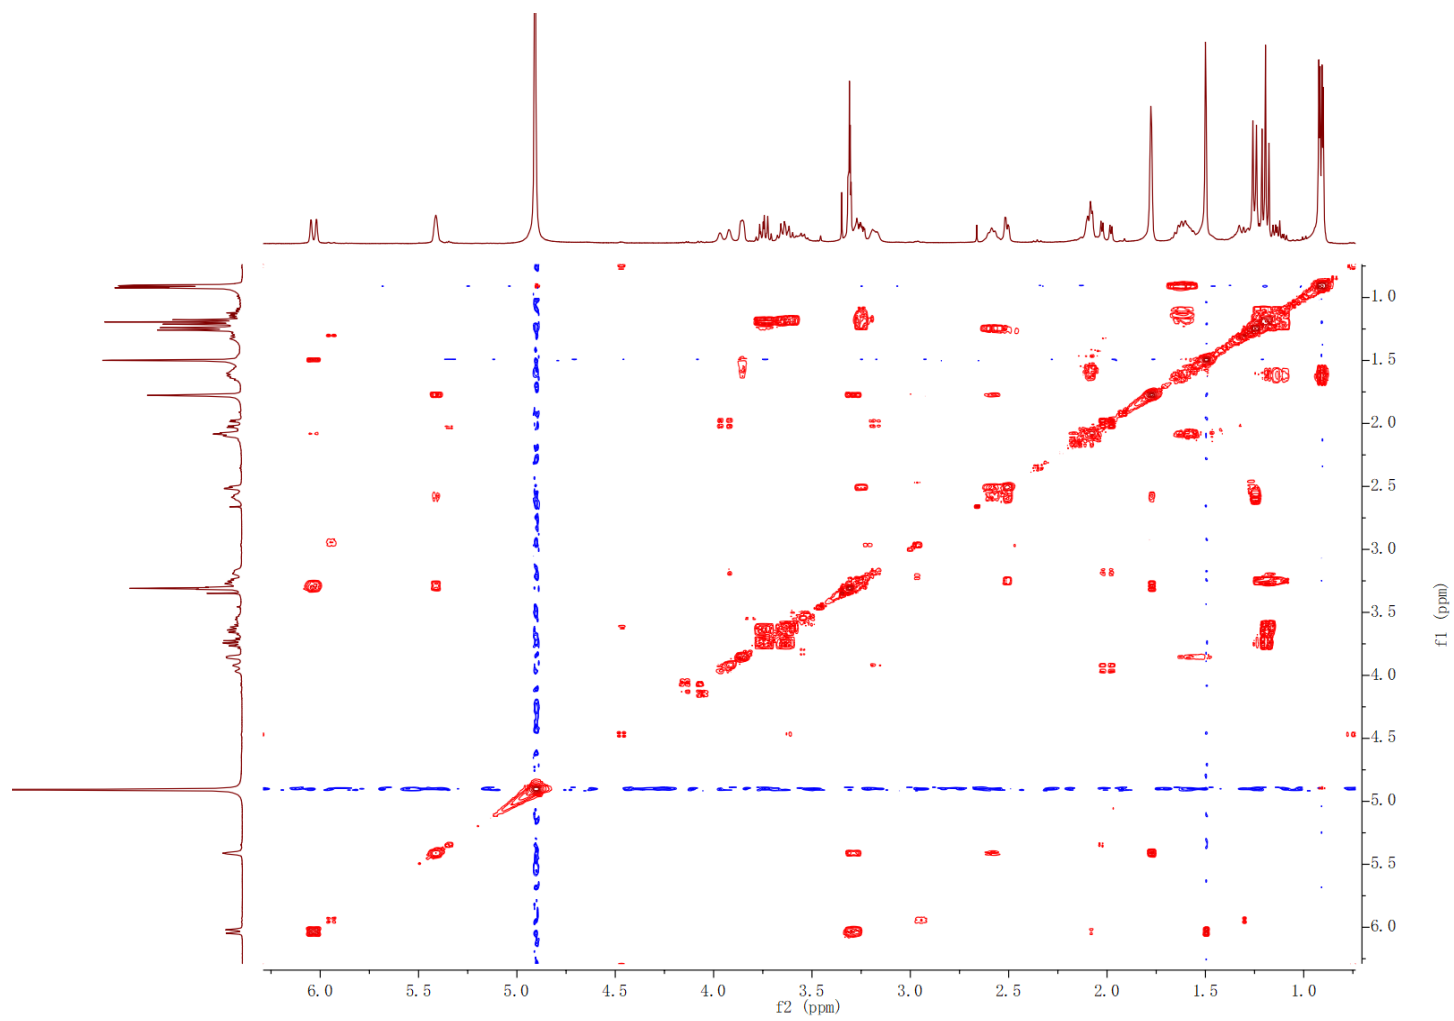

**Figure S52.**  $^1\text{H}$ - $^1\text{H}$  COSY of compound **5** (in  $\text{CD}_3\text{OD}$ )

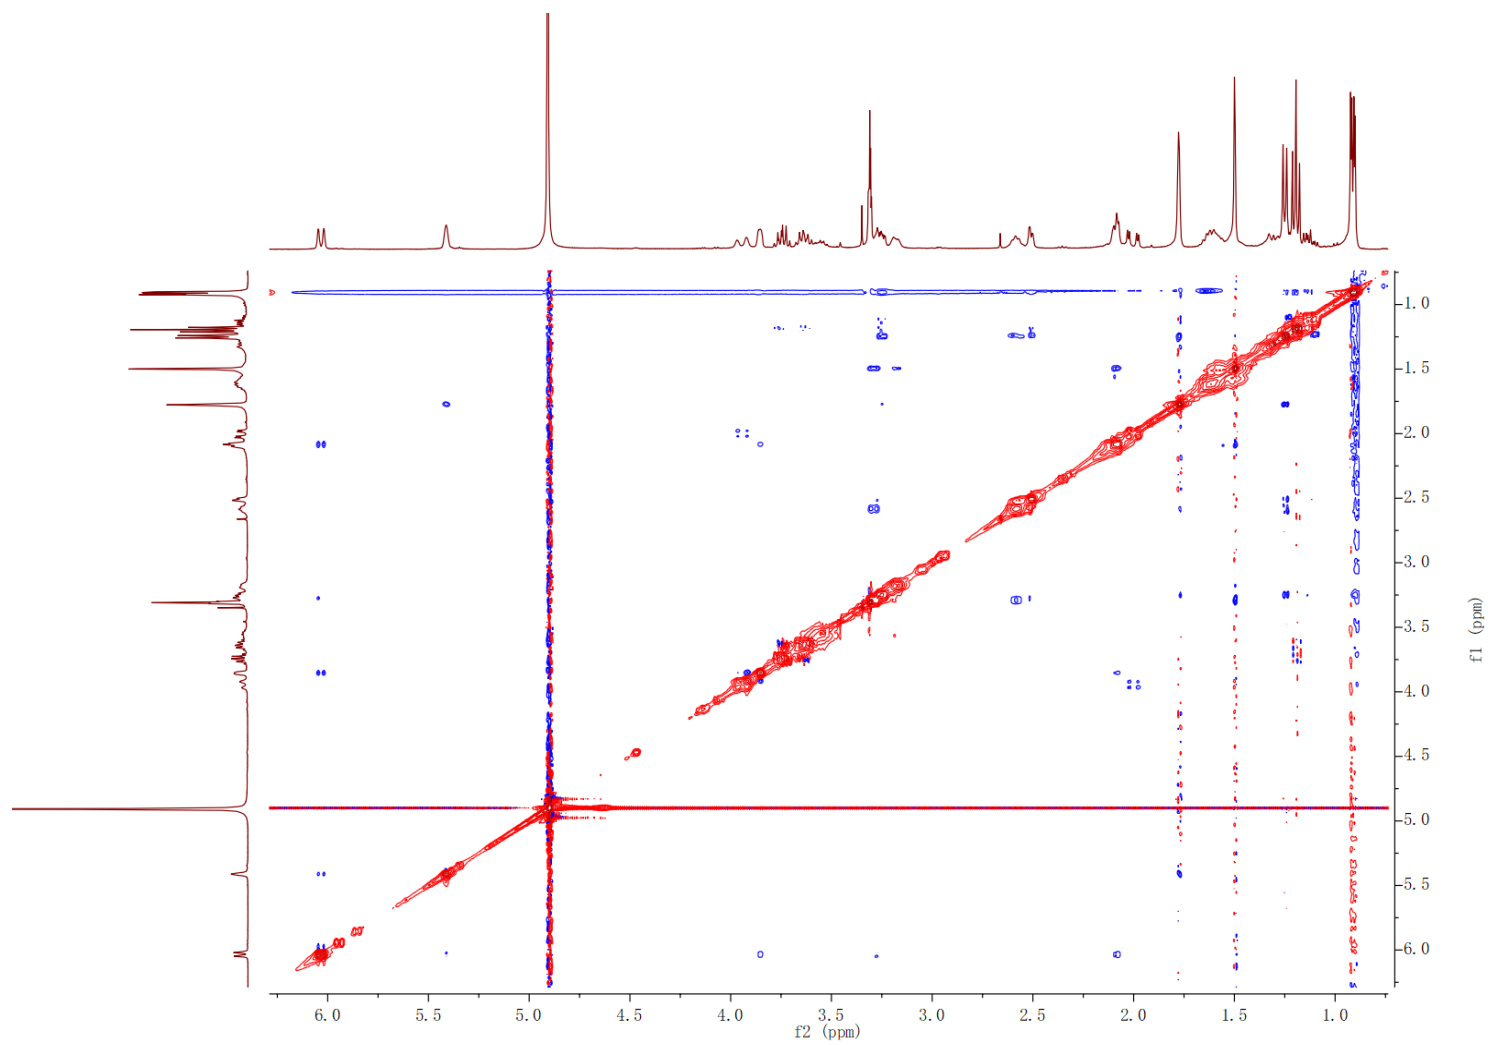

**Figure S53.** NOESY of compound **5** (in CD<sub>3</sub>OD)

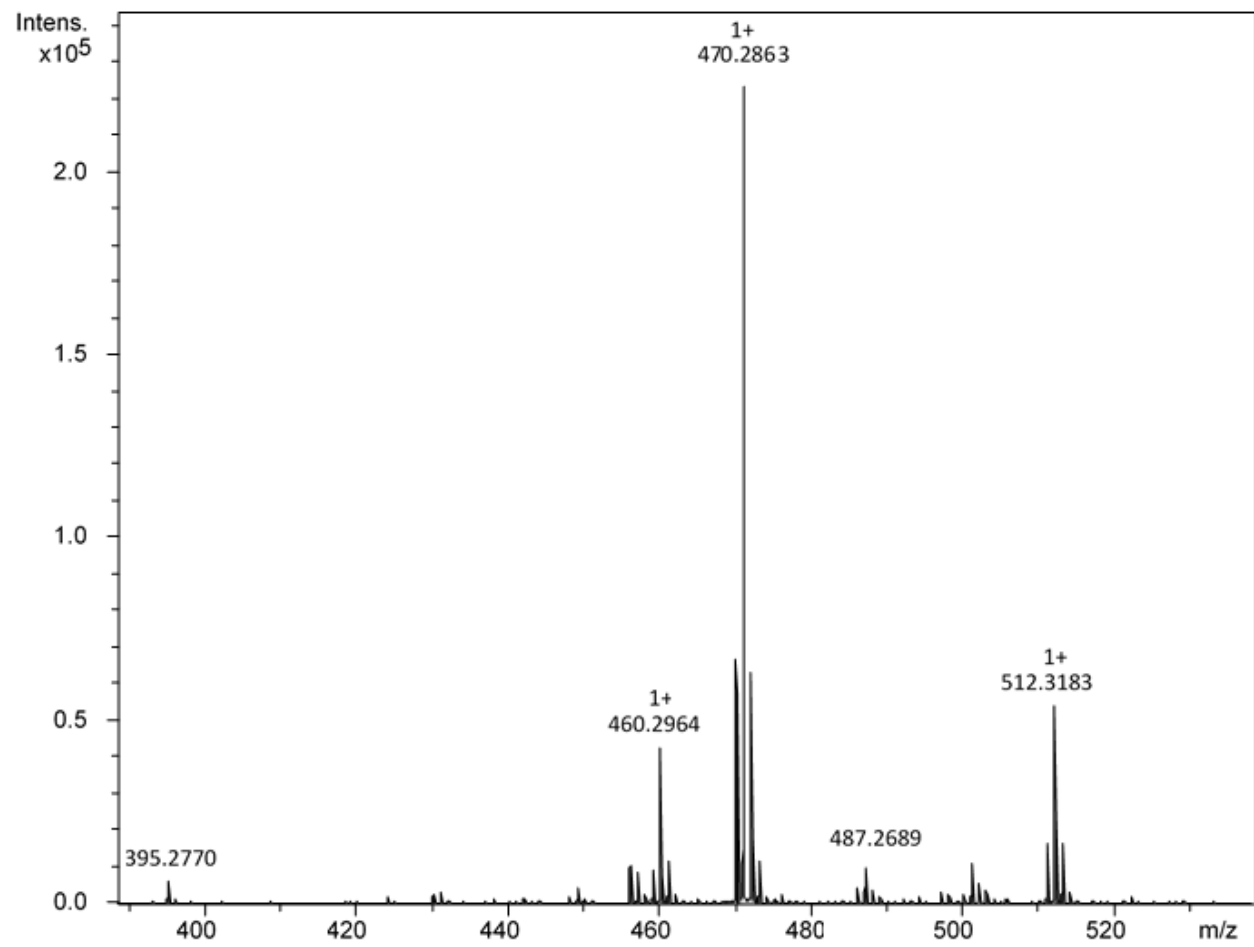

Figure S54. HRESIMS of compound 5

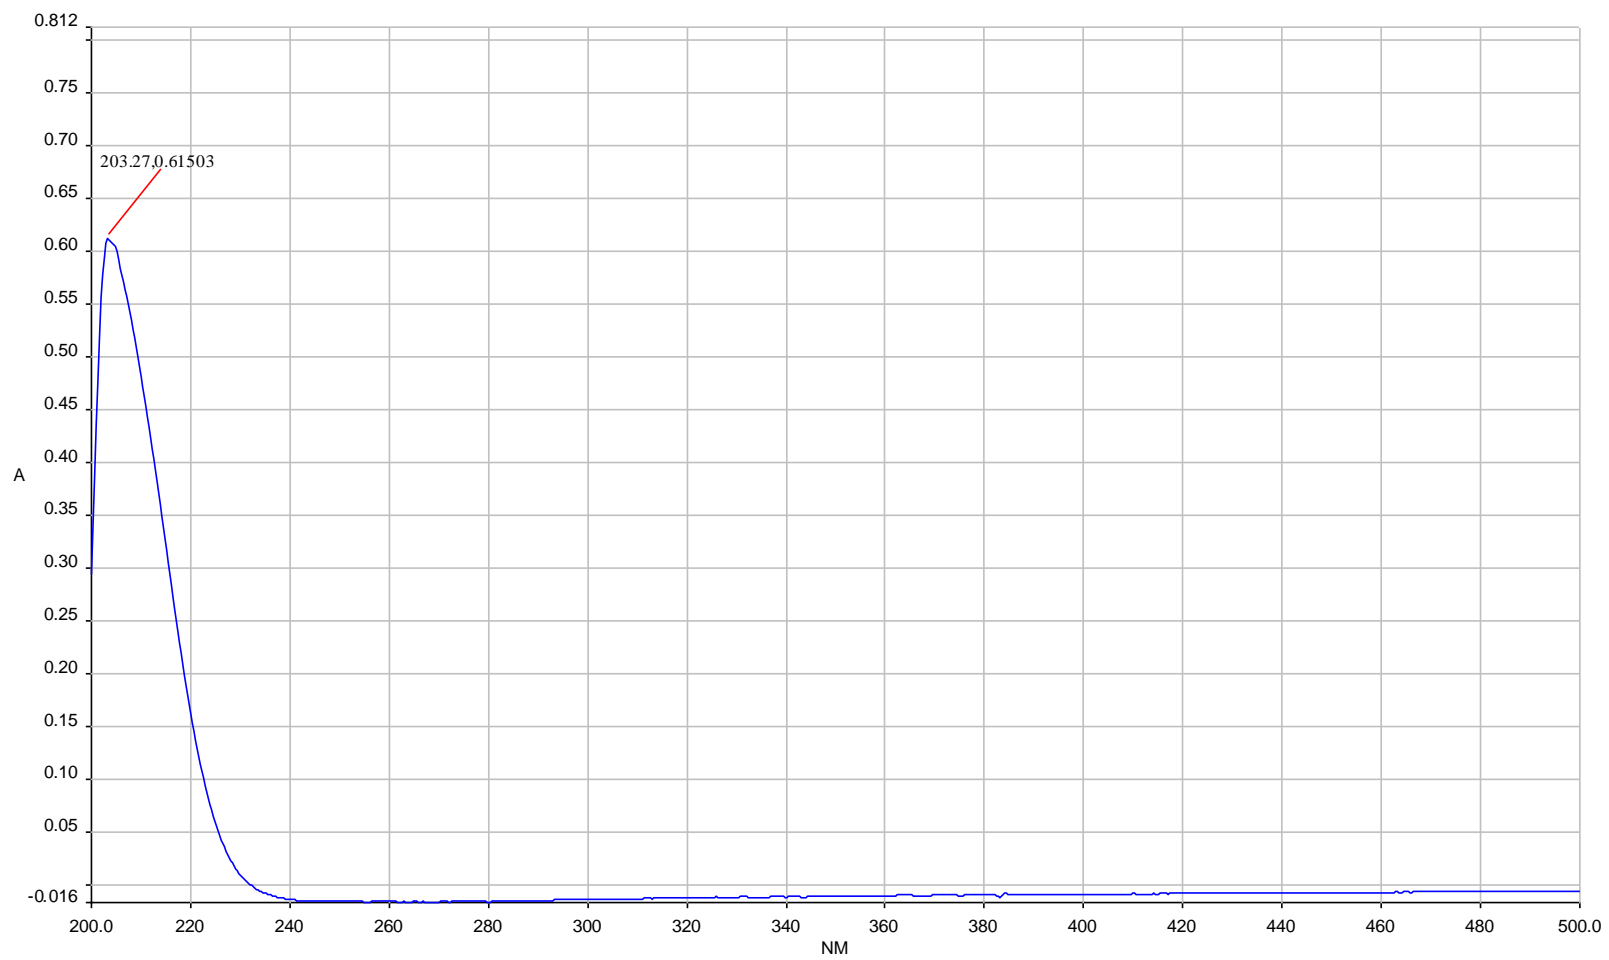

**Figure S55.** UV of compound **5**

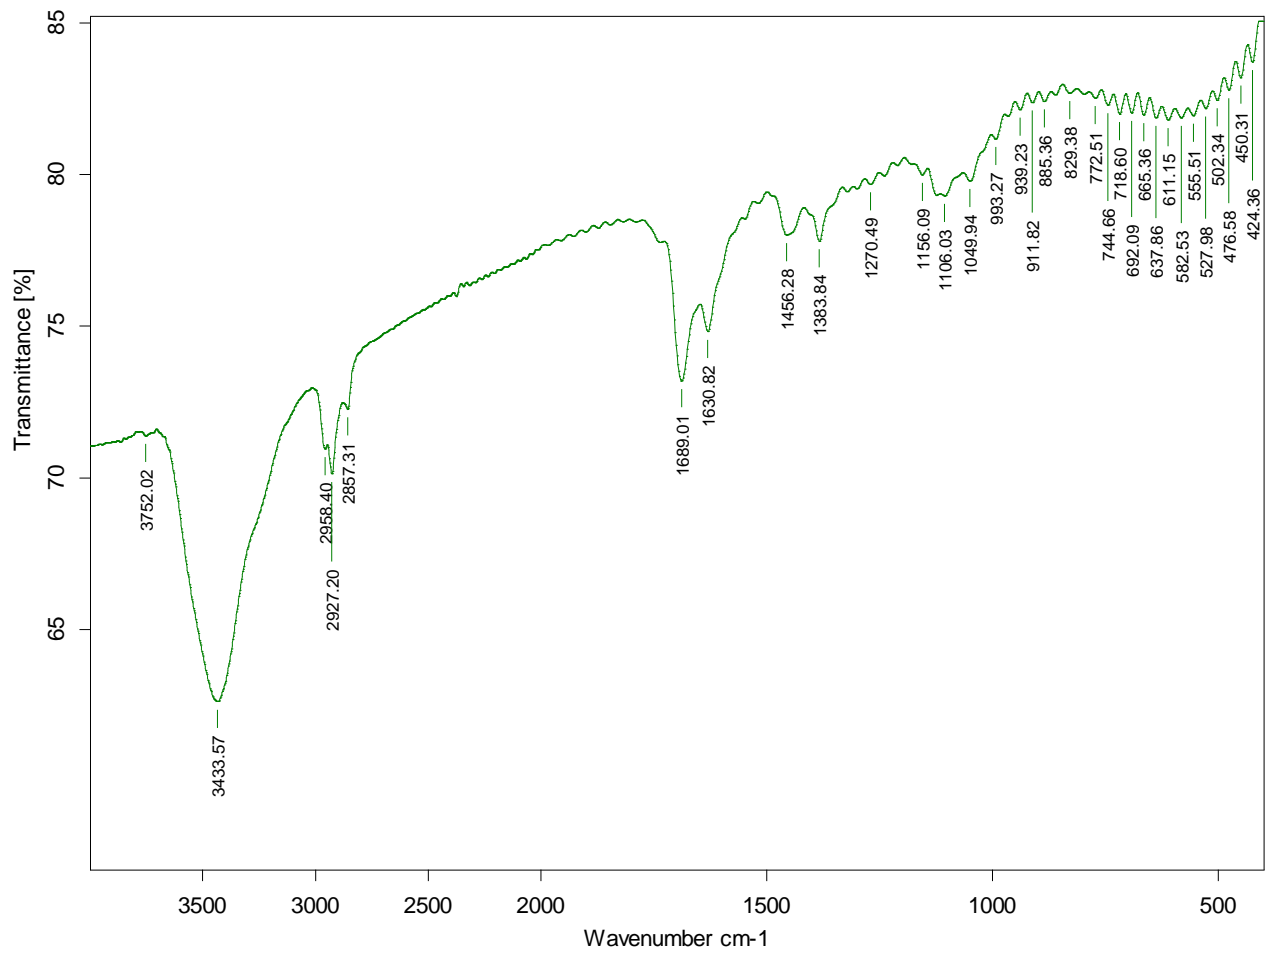

**Figure S56.** IR of compound **5**



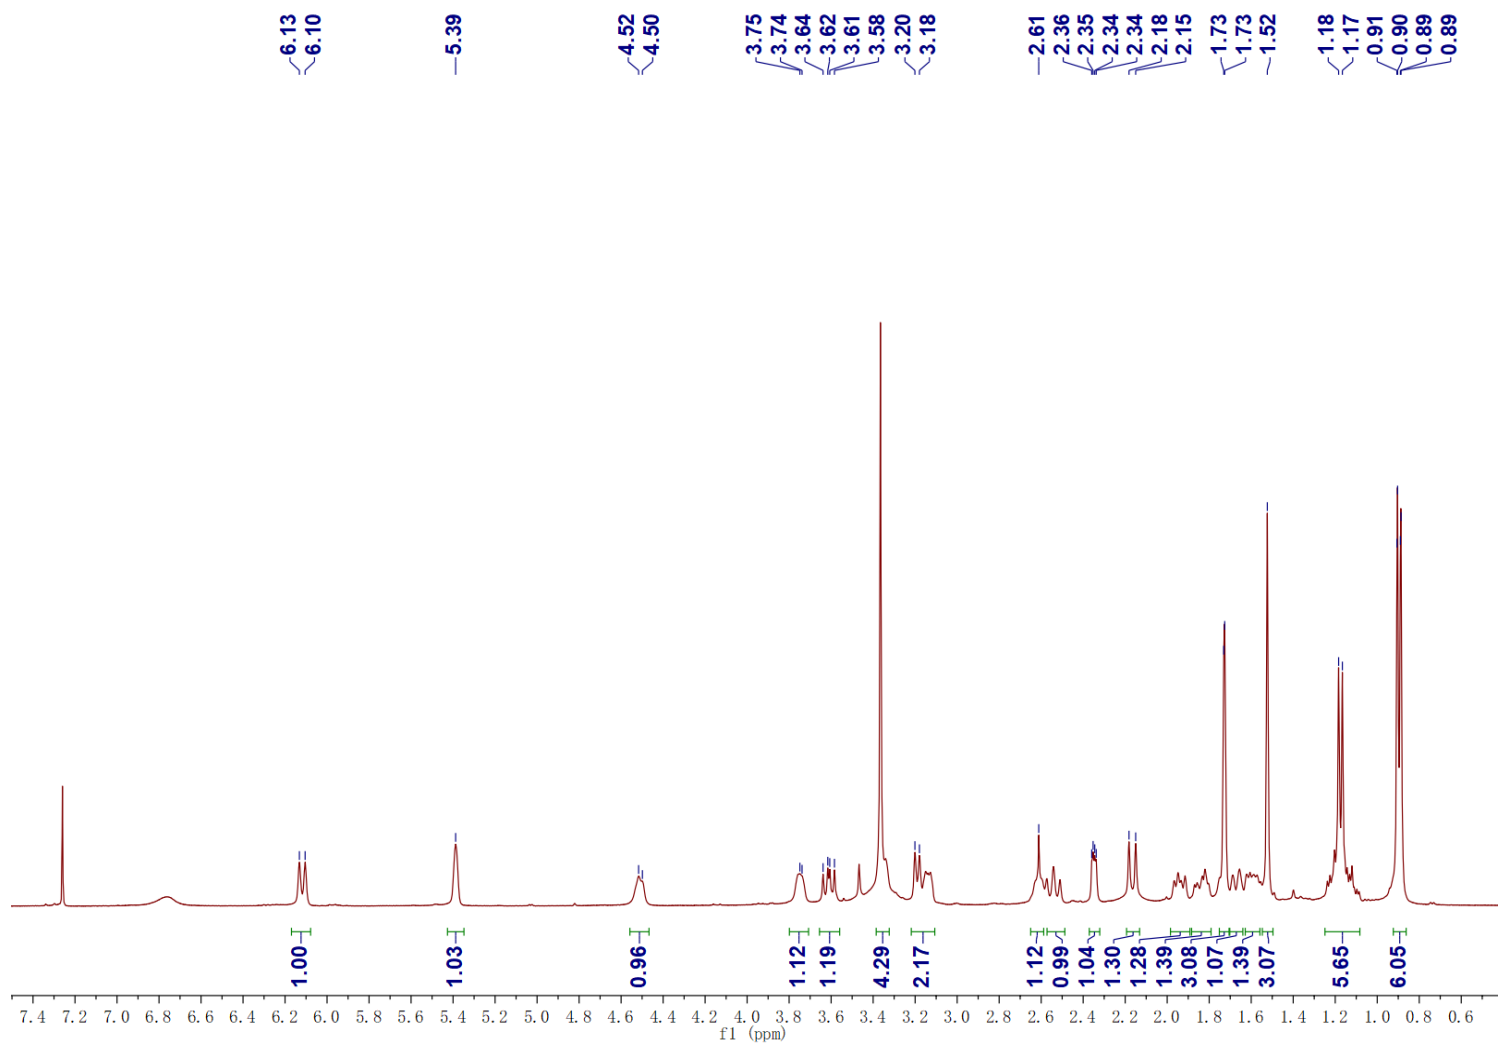

Figure S57. <sup>1</sup>H NMR of compound **6** (in CDCl<sub>3</sub>)

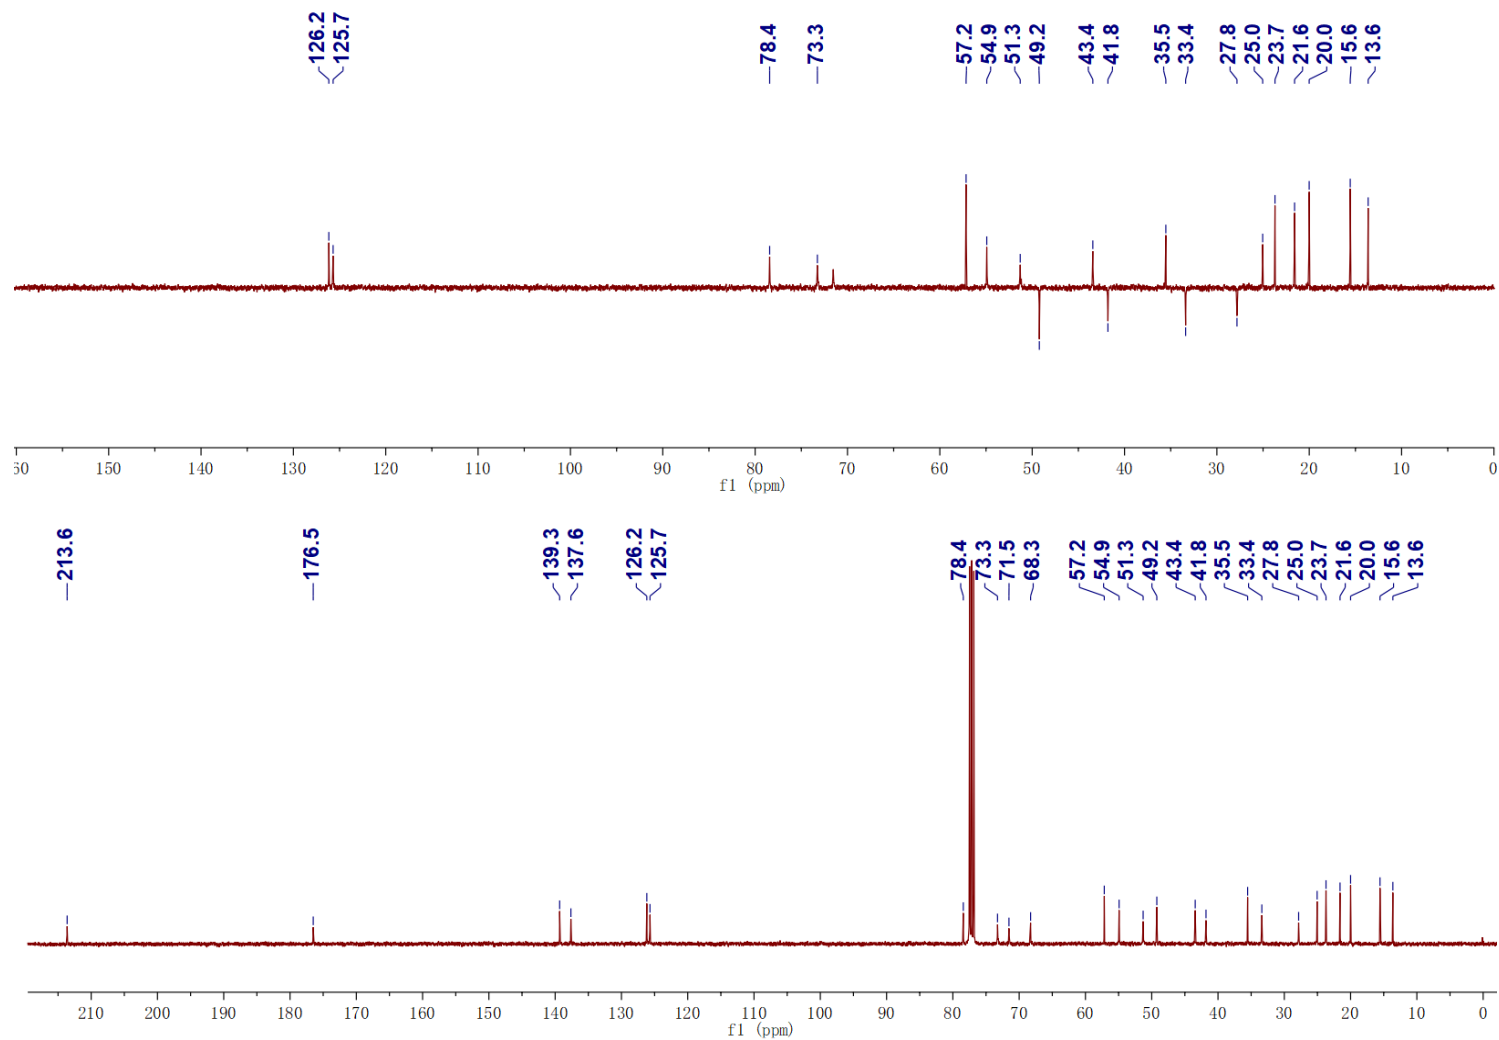

Figure S58.  $^{13}\text{C}$  NMR of compound 6 (in  $\text{CDCl}_3$ )

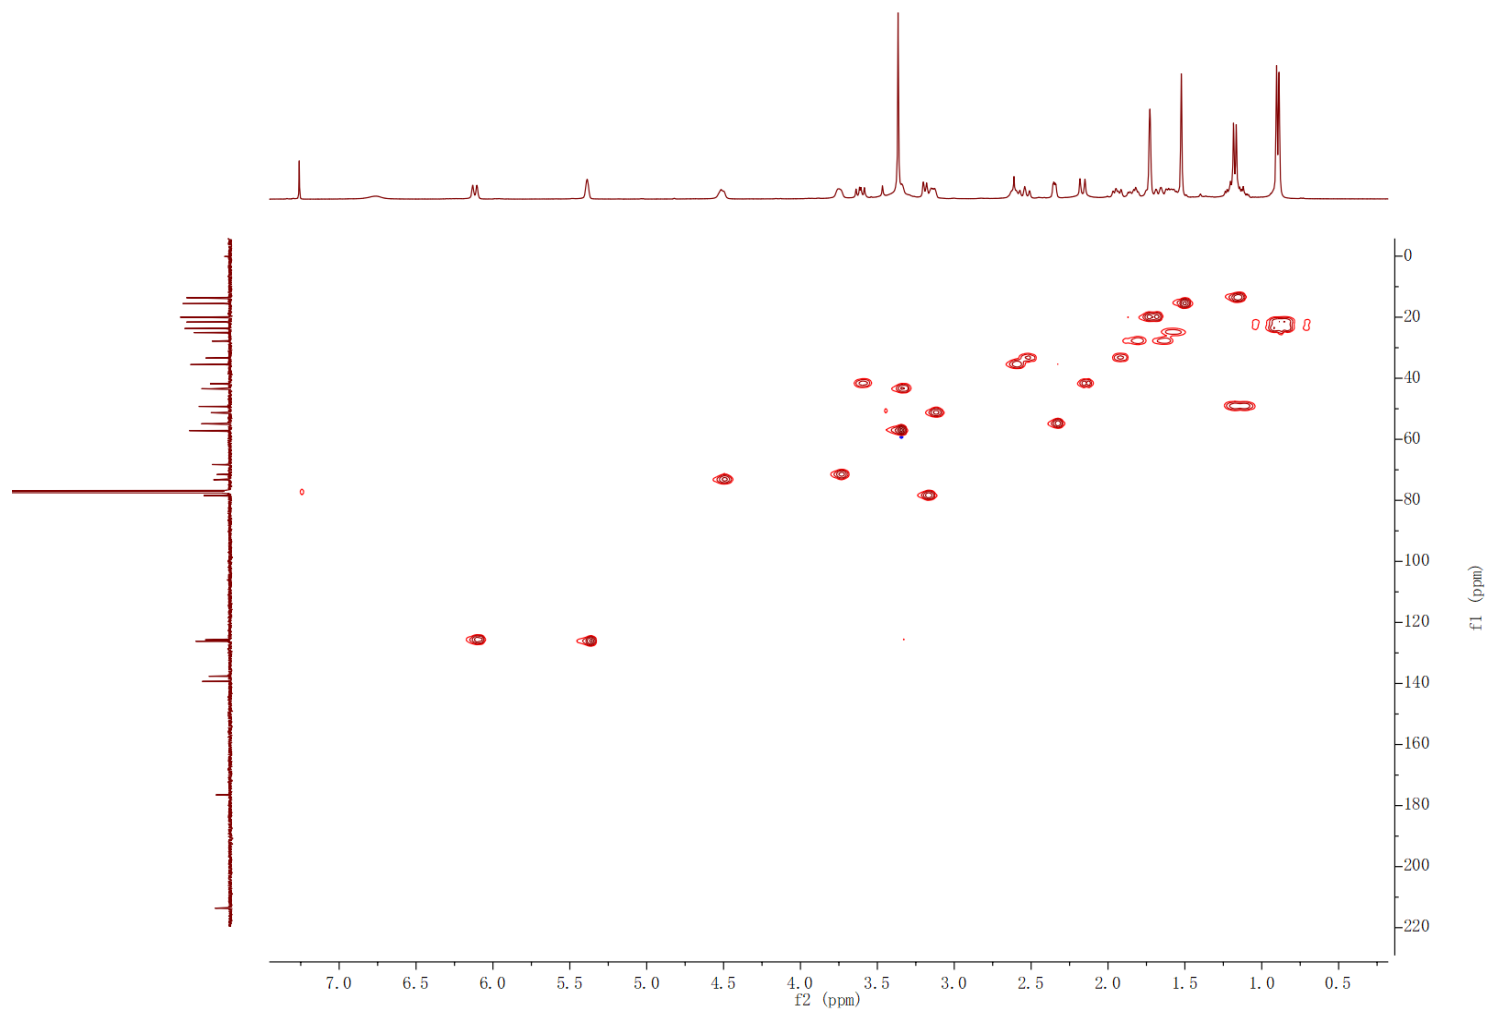

**Figure S59.** HSQC of compound **6** (in CDCl<sub>3</sub>)

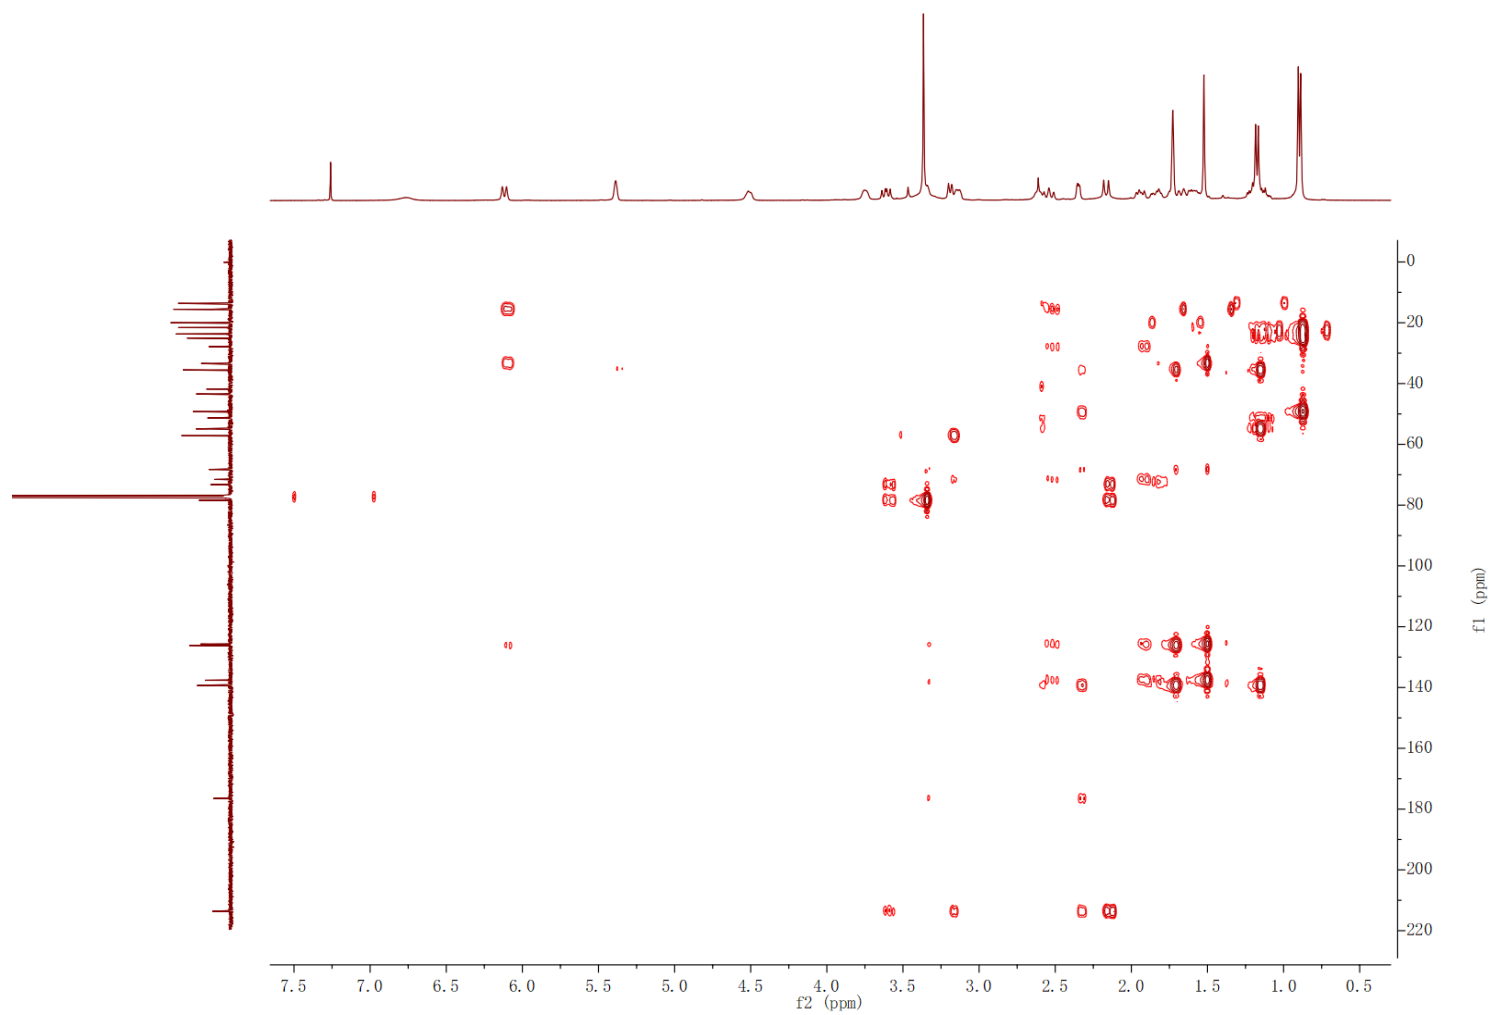

**Figure S60.** HMBC of compound **6** (in CDCl<sub>3</sub>)

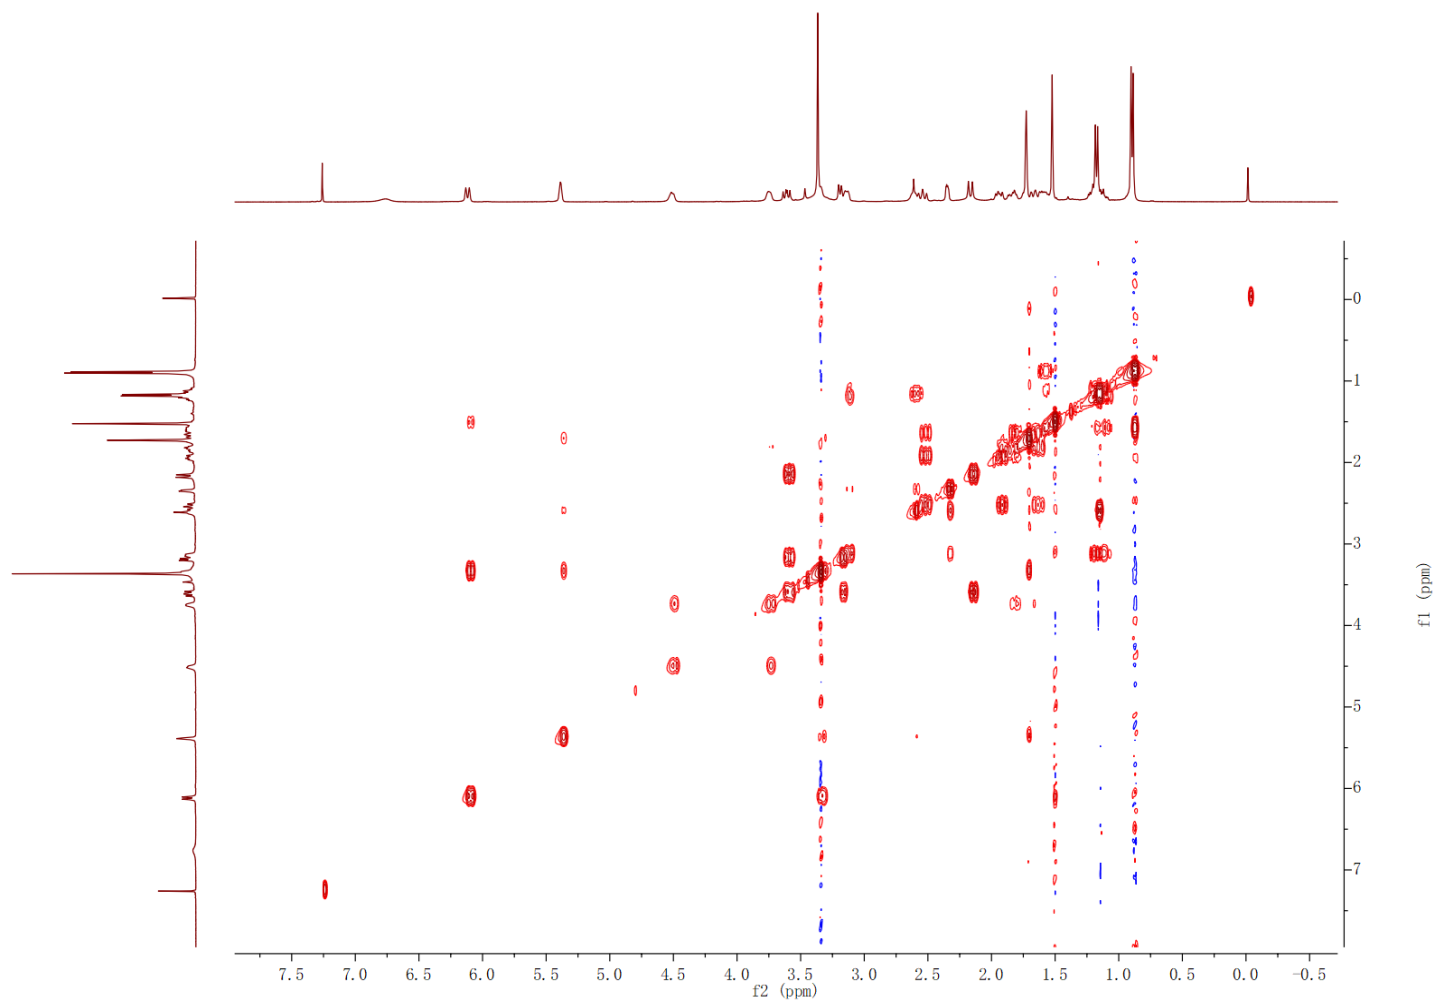

**Figure S61.**  $^1\text{H}$ - $^1\text{H}$  COSY of compound **6** (in  $\text{CDCl}_3$ )

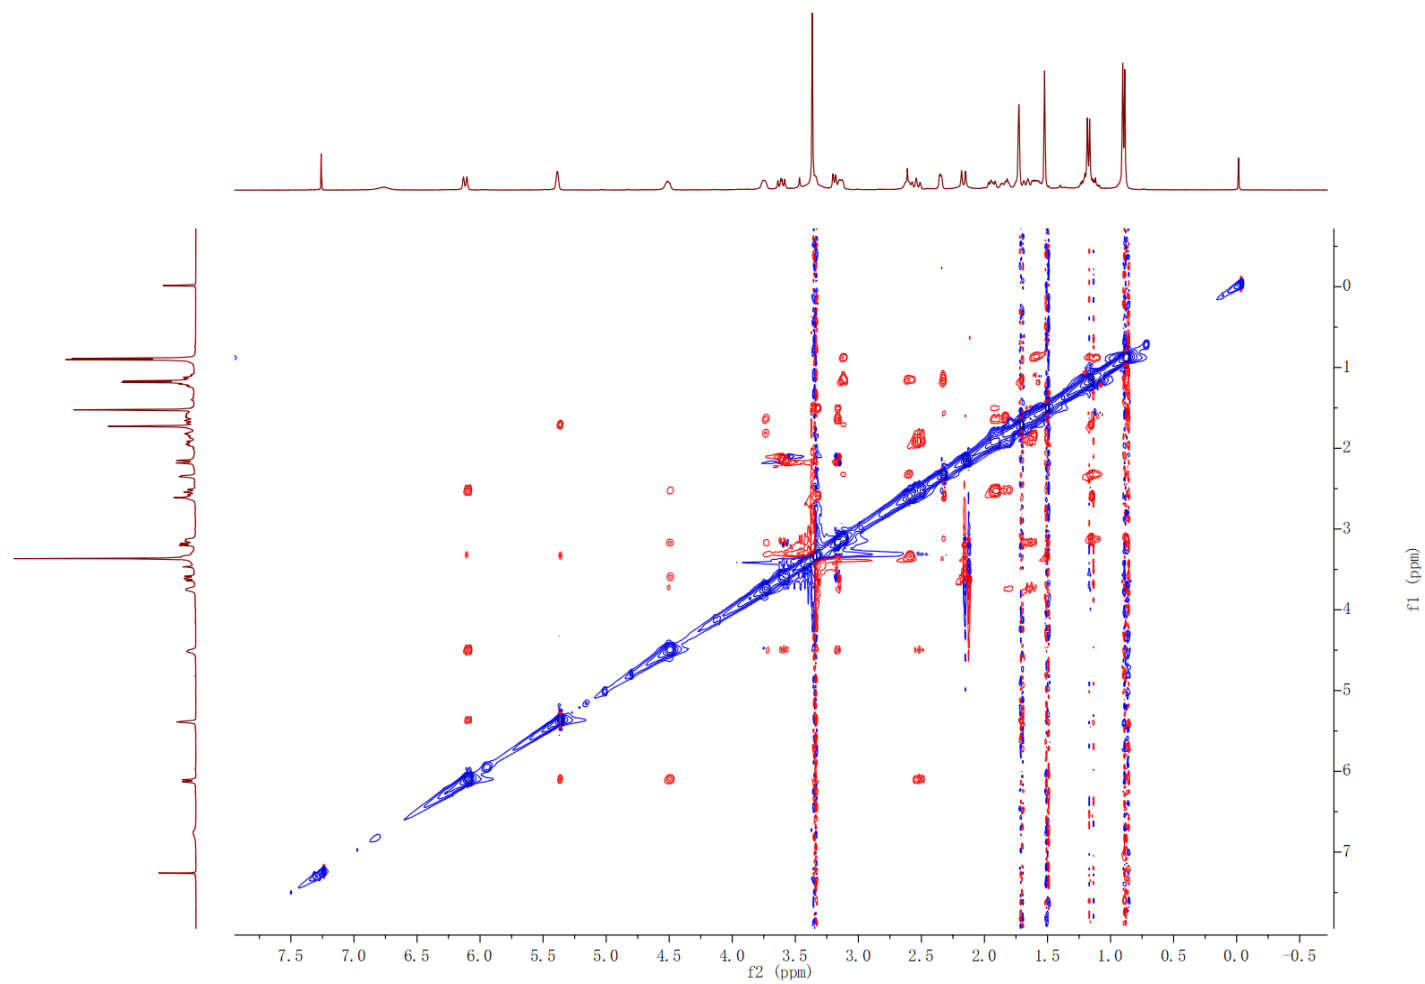

**Figure S62.** NOESY of compound **6** (in CDCl<sub>3</sub>)

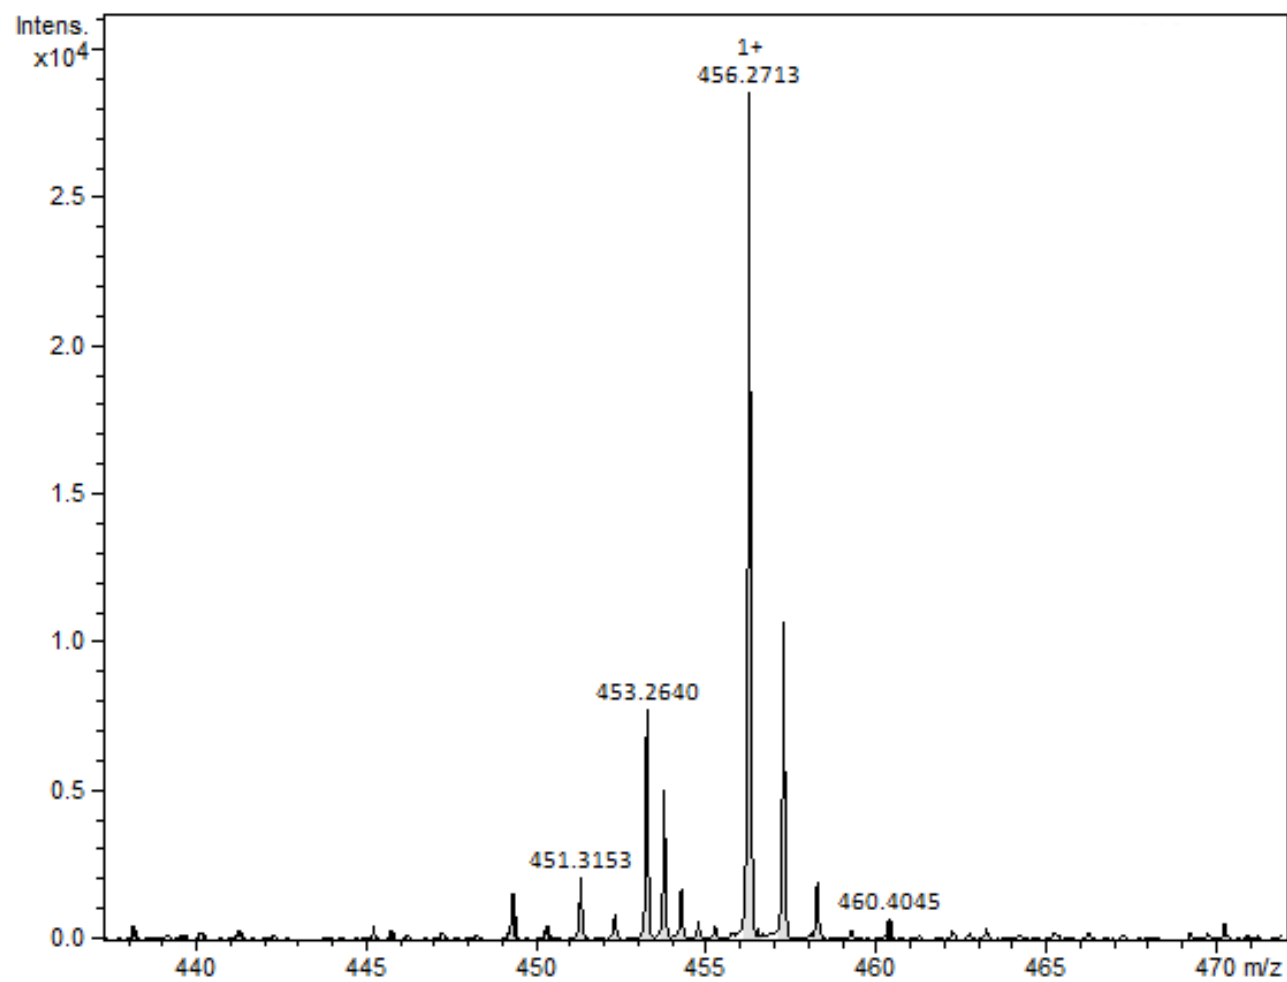

Figure S63. HRESIMS of compound 6

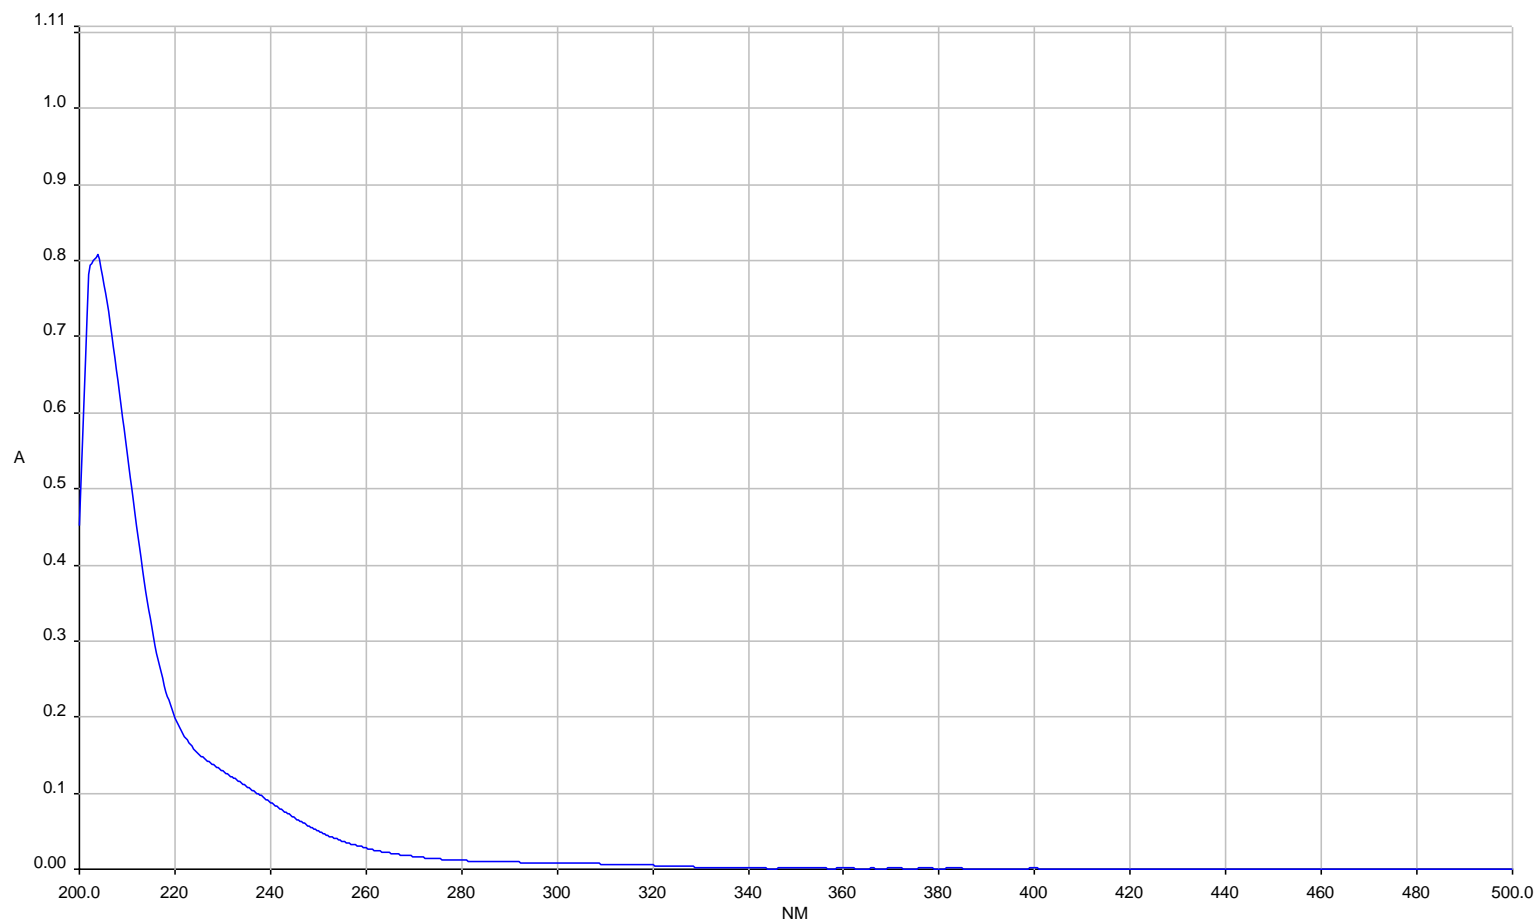

**Figure S64.** UV of compound **6**



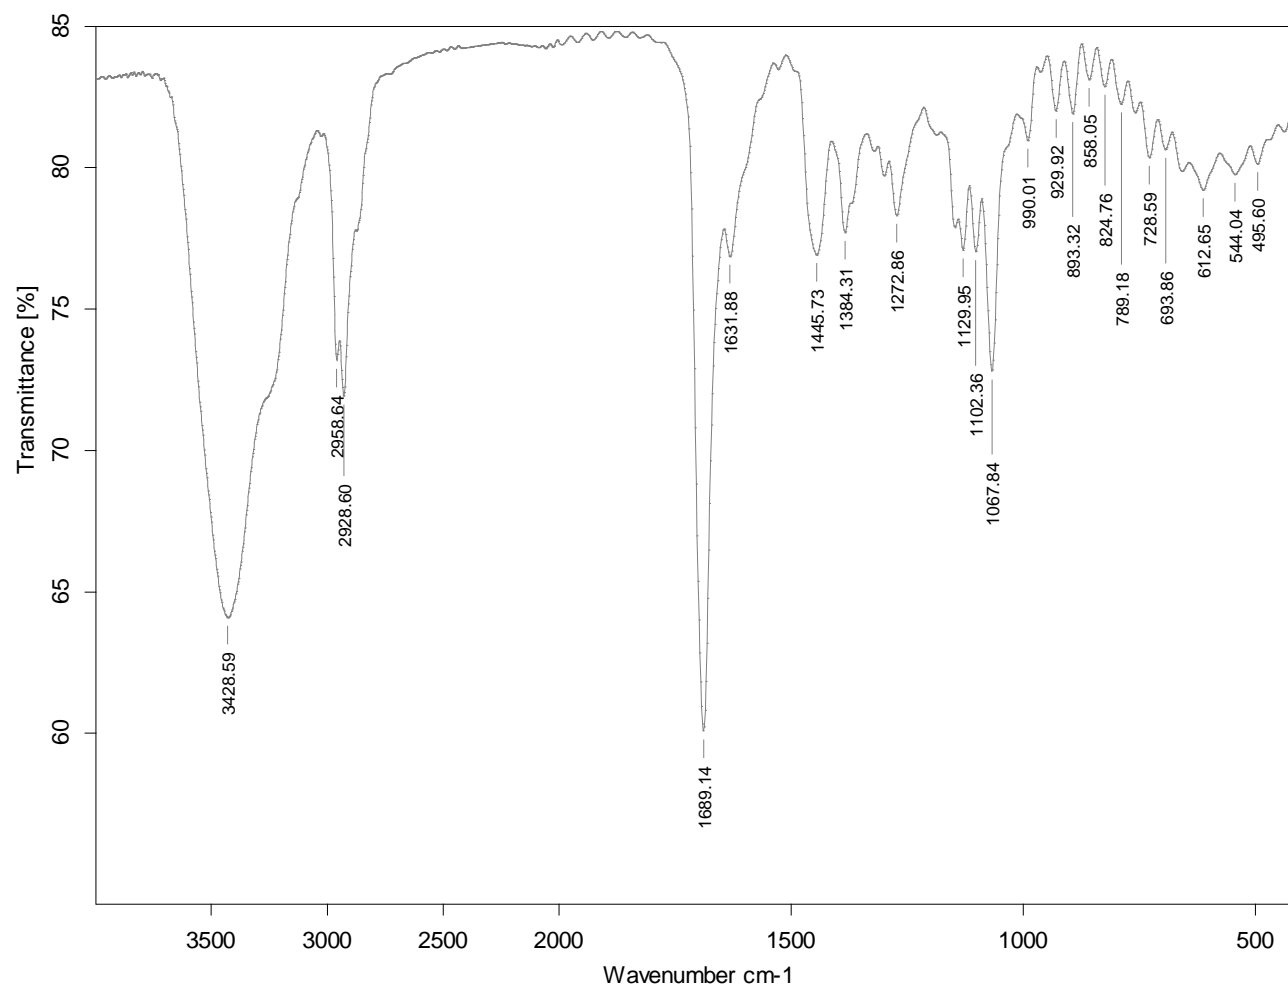

**Figure S65.** IR of compound **6**

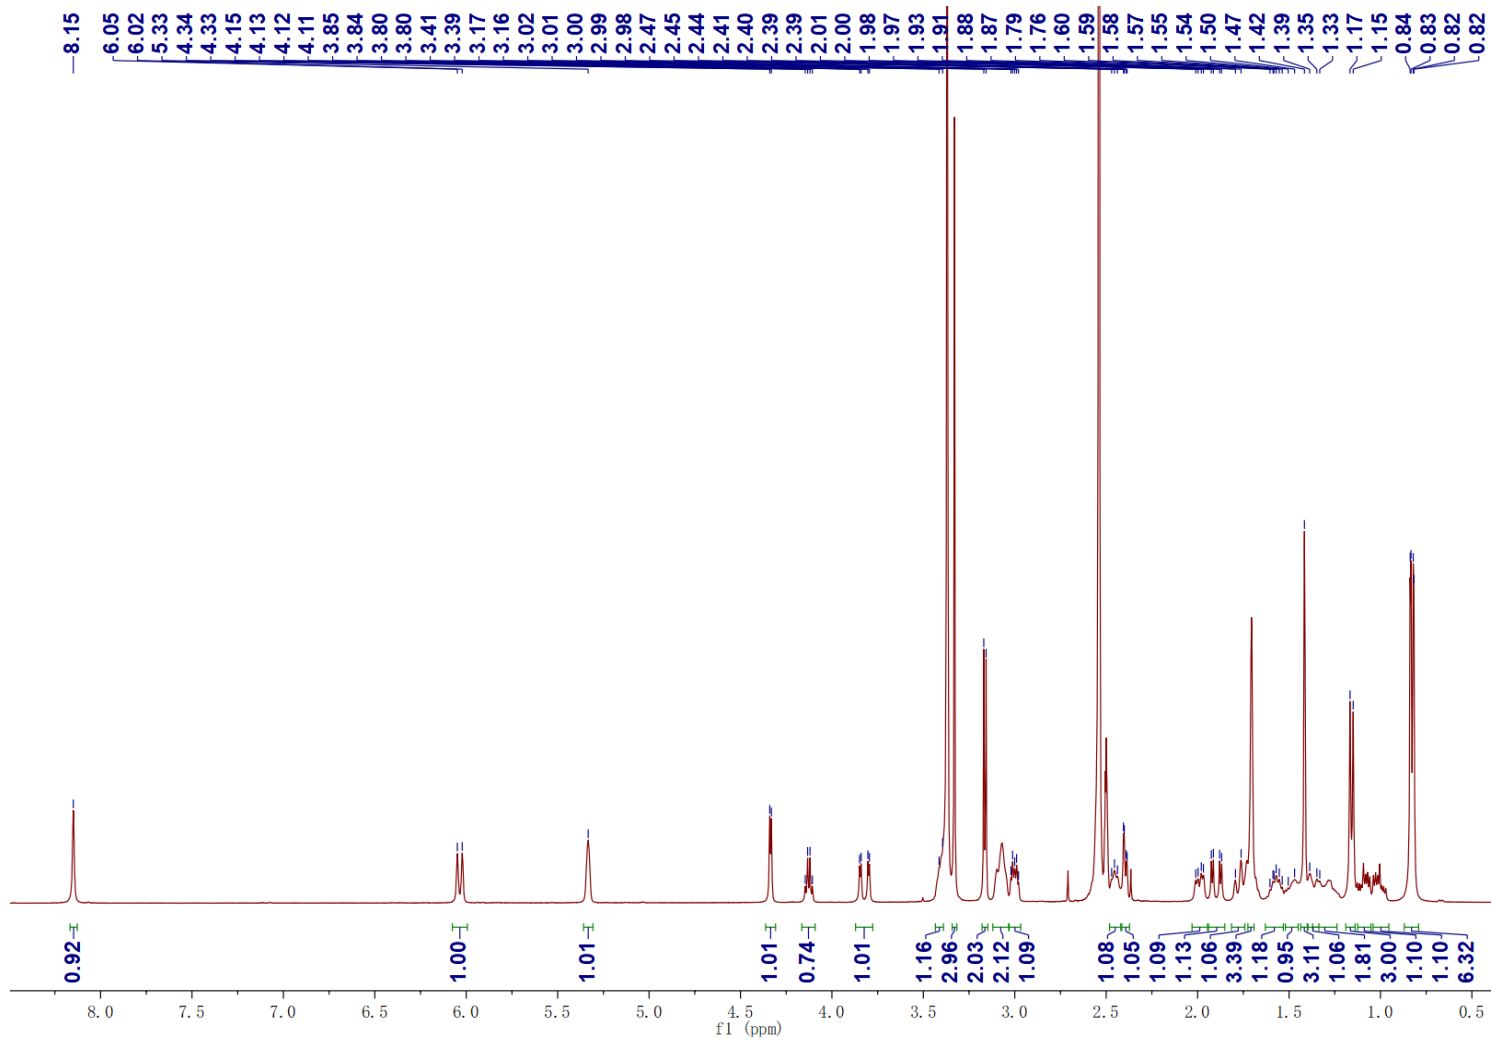

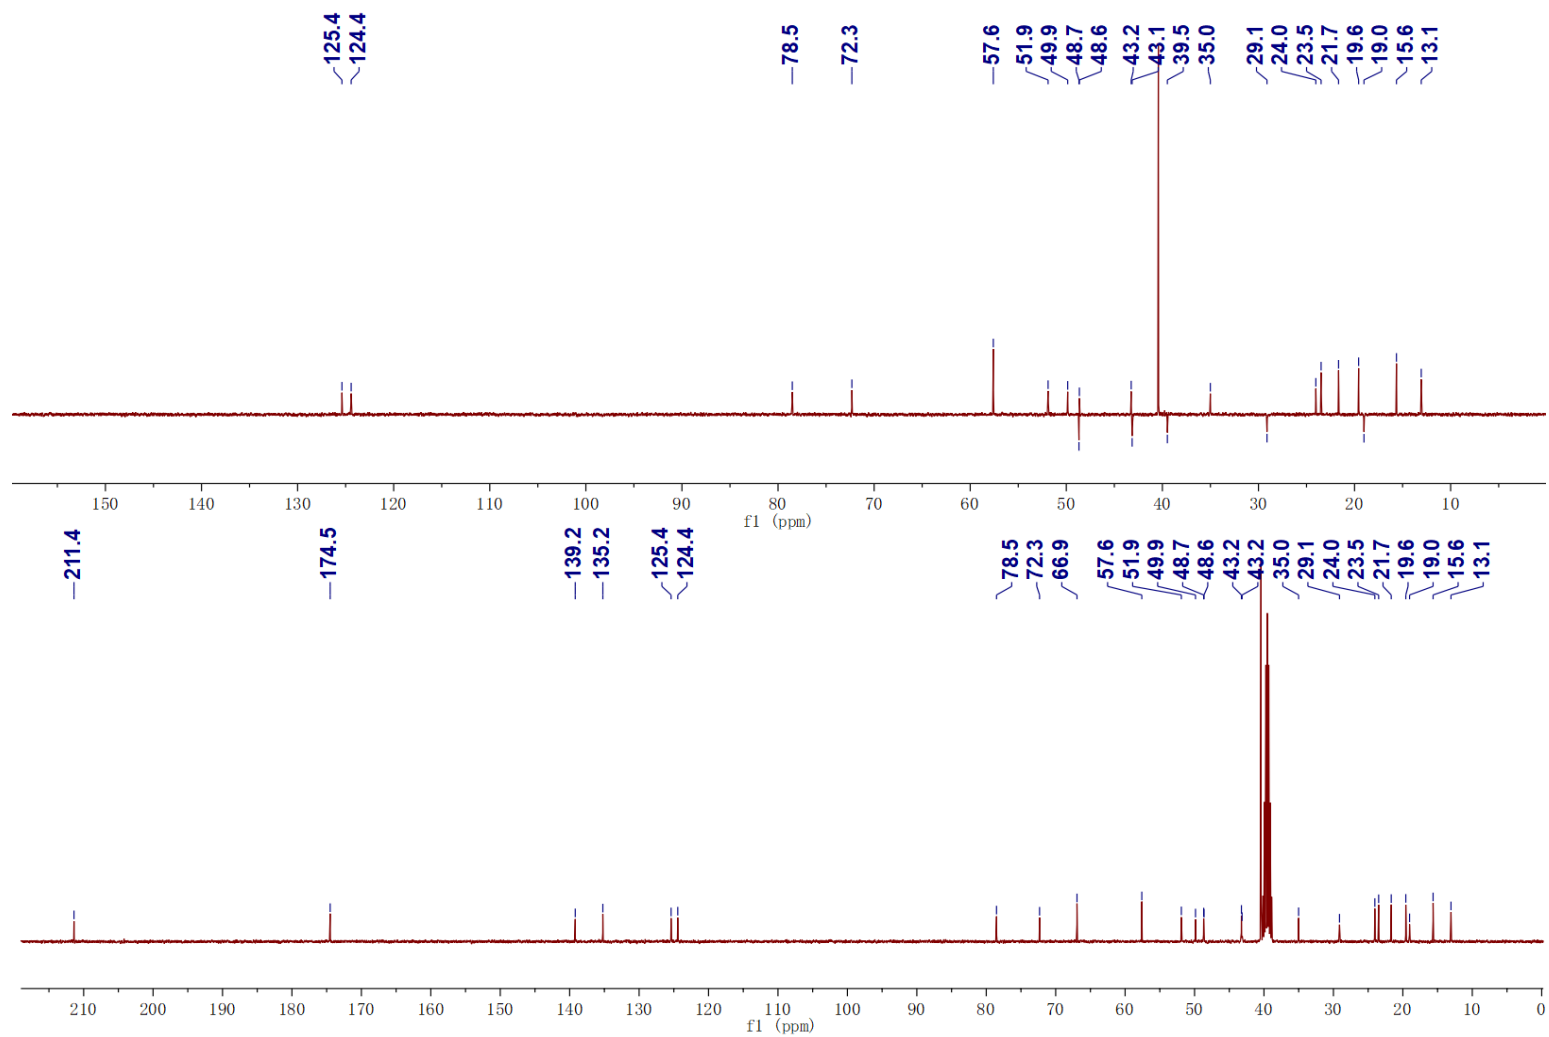

Figure S67.  $^{13}\text{C}$  NMR of compound 7 (in  $\text{DMSO-}d_6$ )

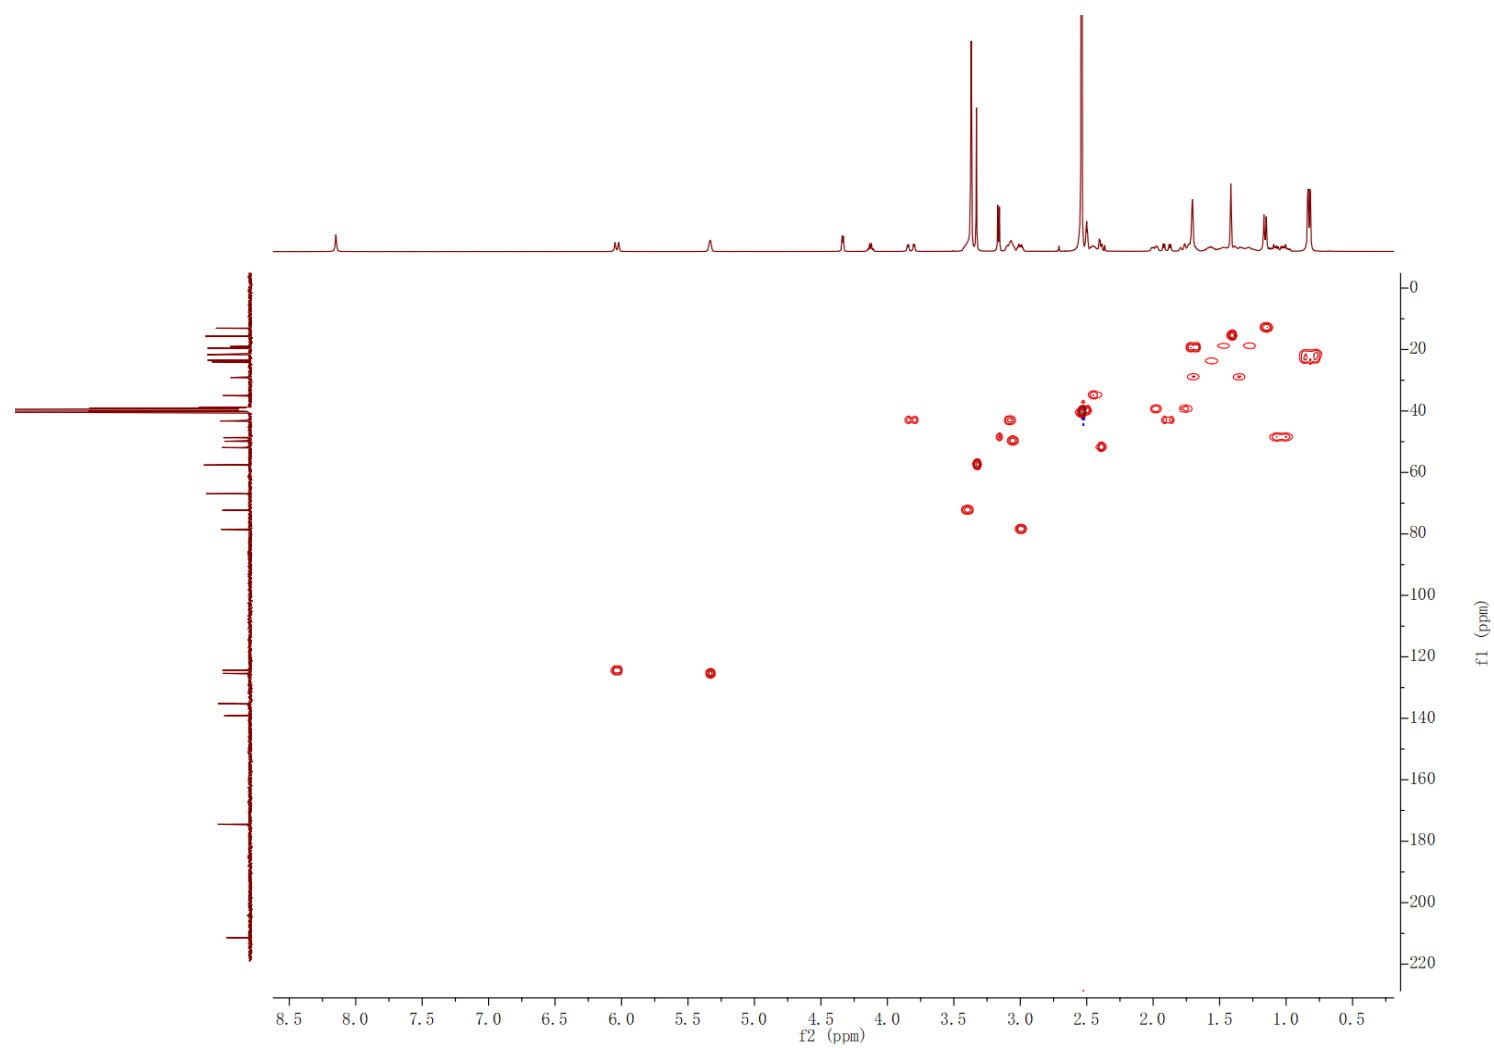

**Figure S68.** HSQC of compound 7 (in DMSO-*d*<sub>6</sub>)

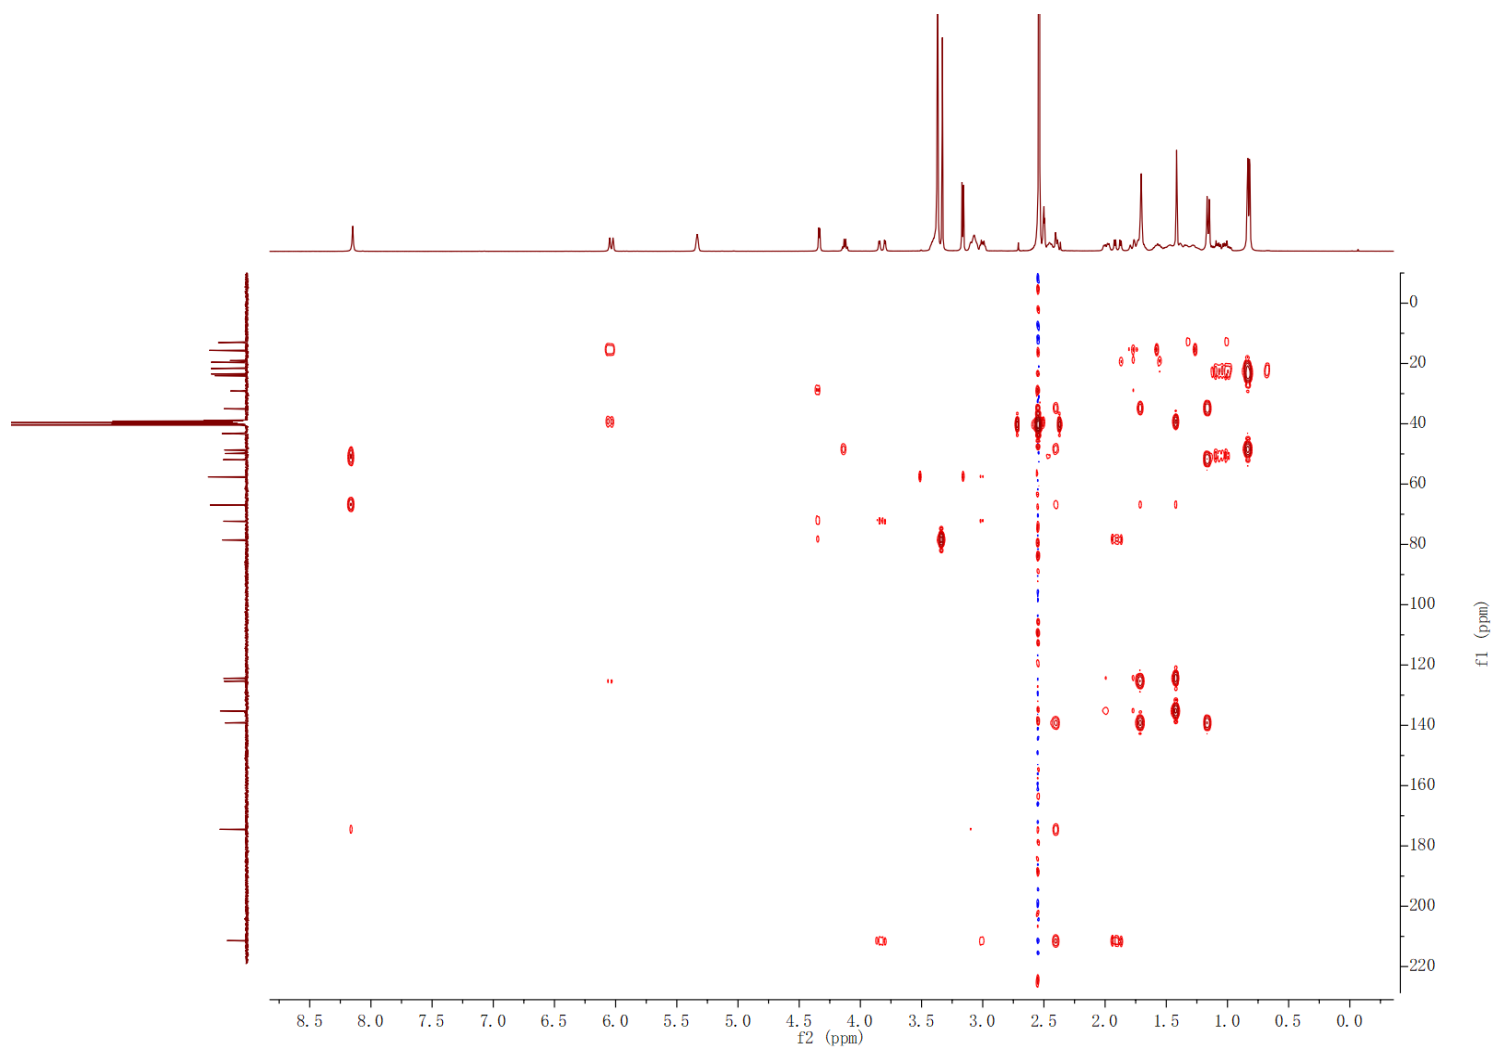

**Figure S69.** HMBC of compound **7** (in DMSO-*d*<sub>6</sub>)

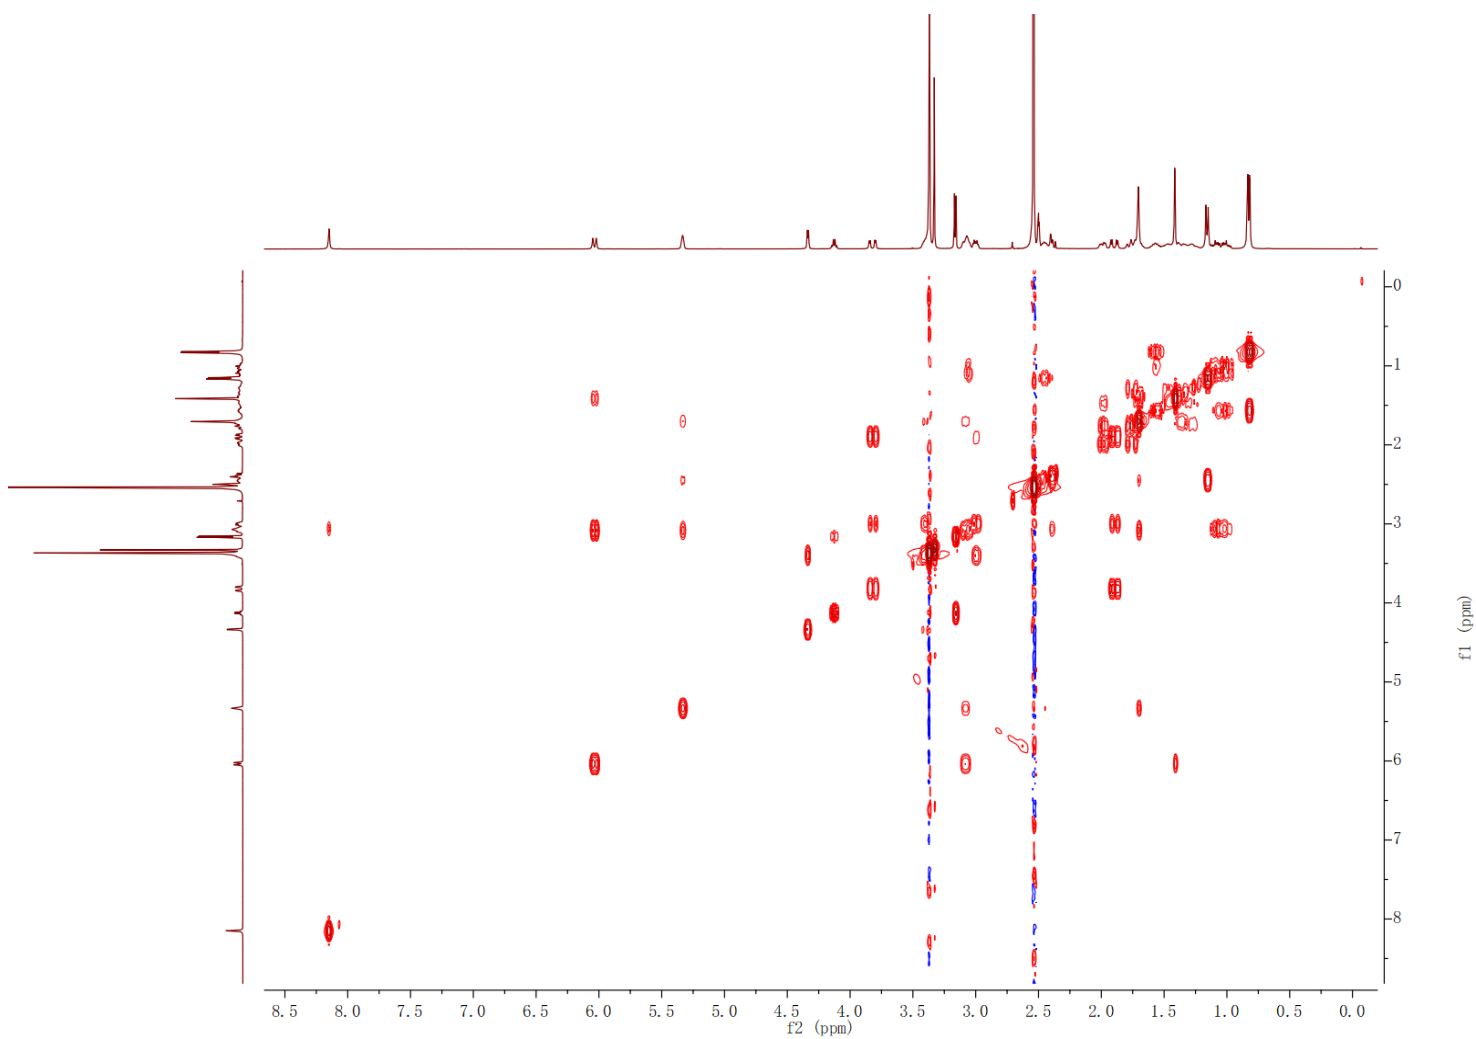

**Figure S70.**  $^1\text{H}$ - $^1\text{H}$  COSY of compound **7** (in  $\text{DMSO-}d_6$ )

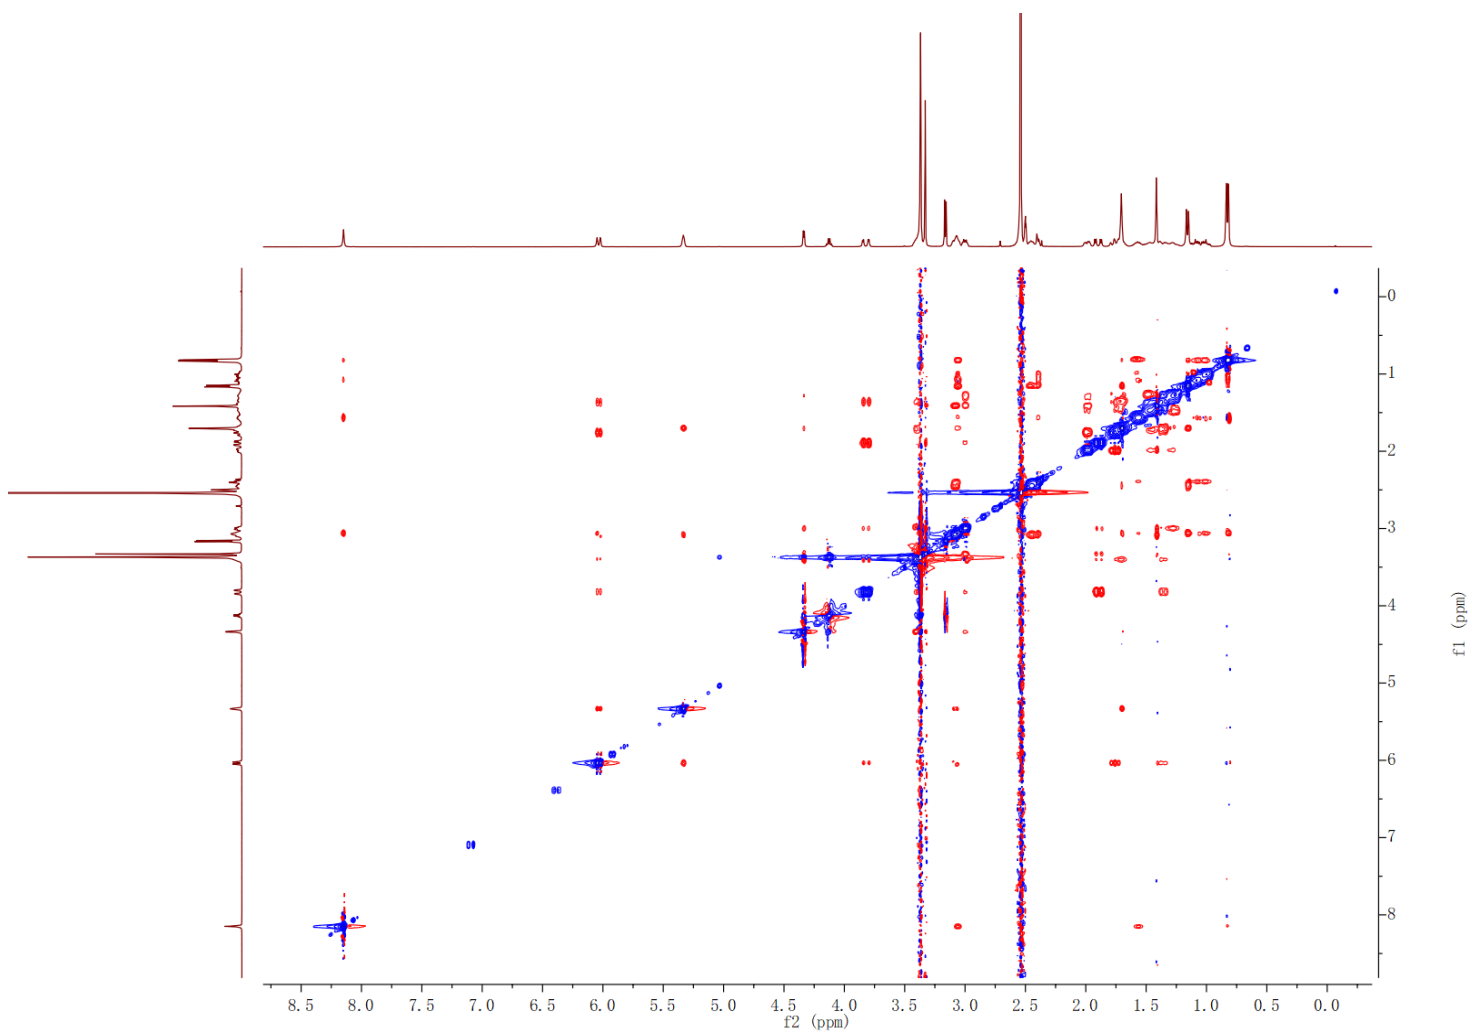

**Figure S71.** NOESY of compound 7 (in DMSO-*d*<sub>6</sub>)

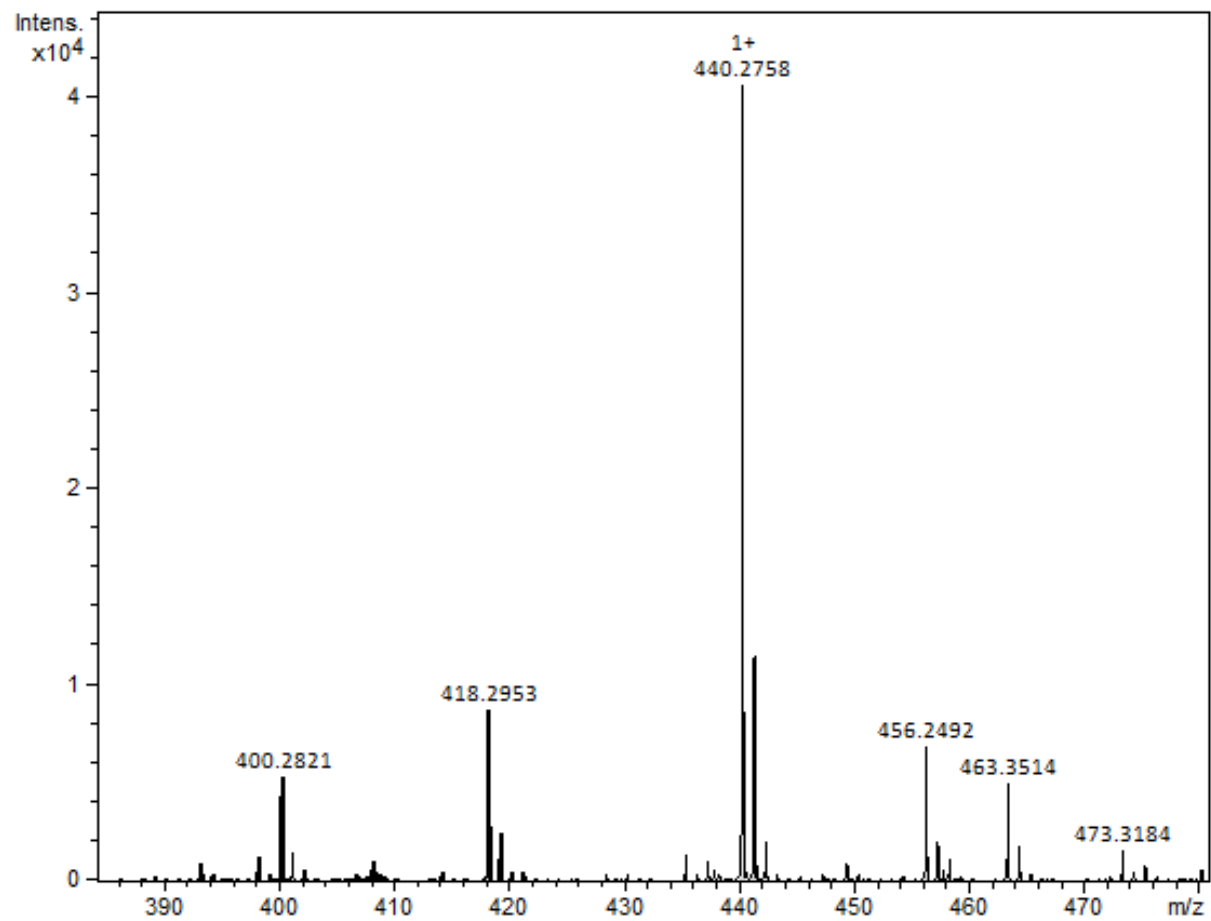

Figure S72. HRESIMS of compound 7



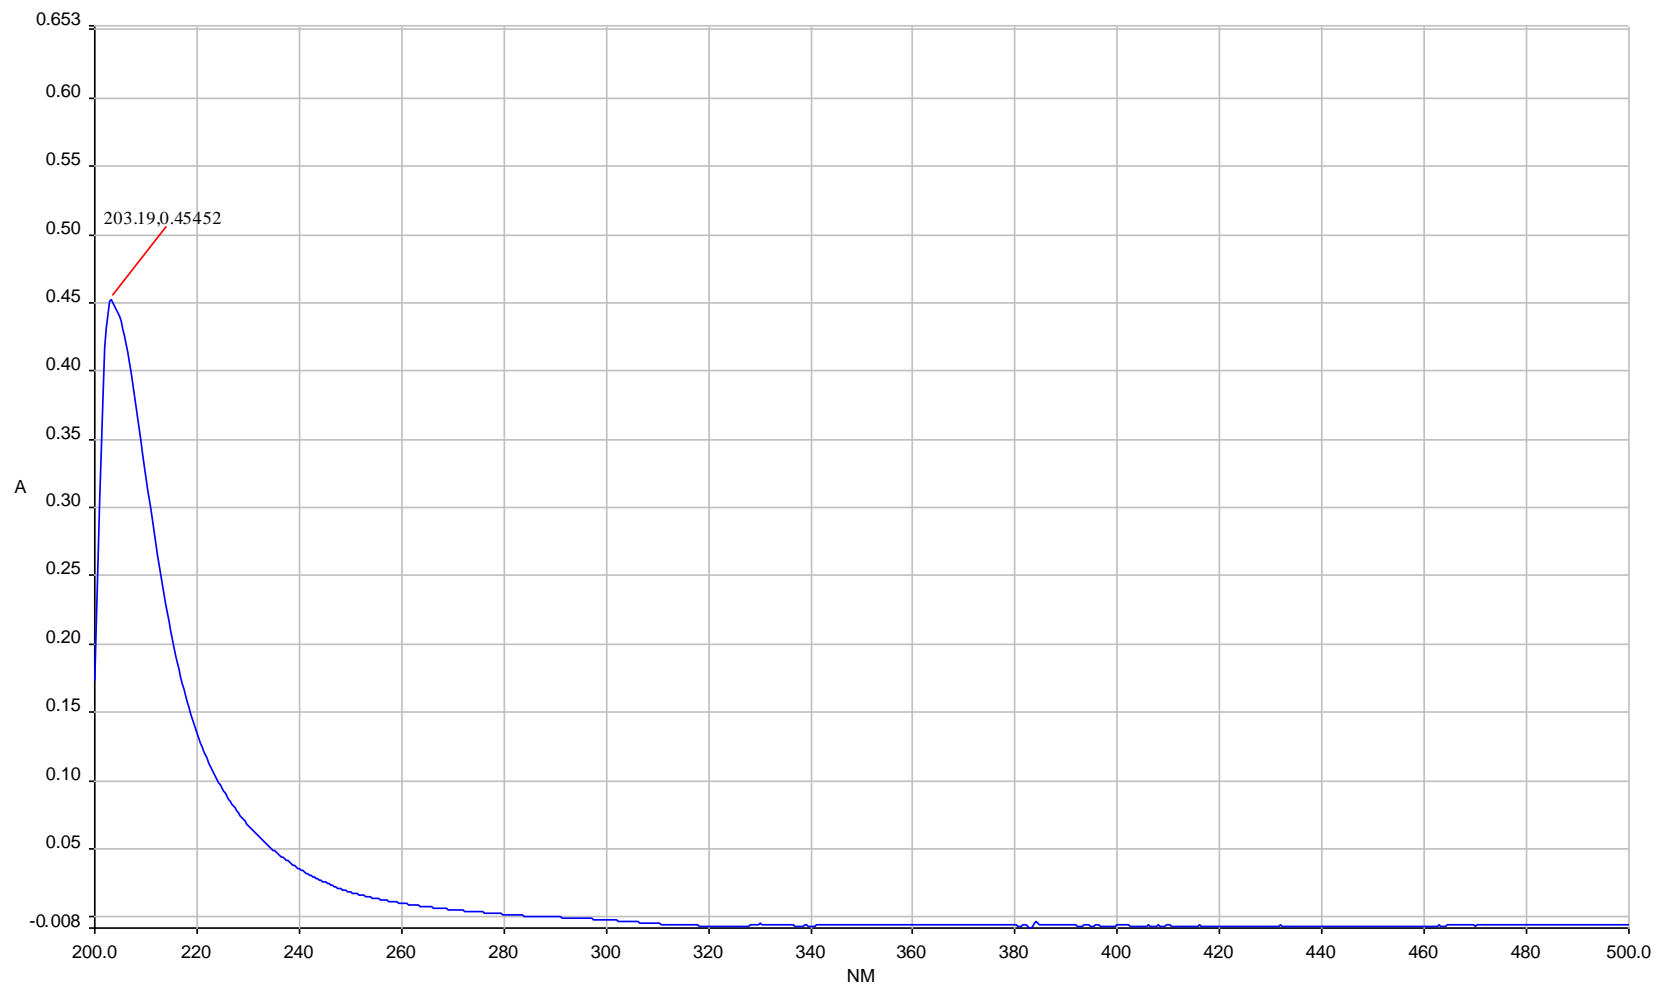

**Figure S73.** UV of compound 7

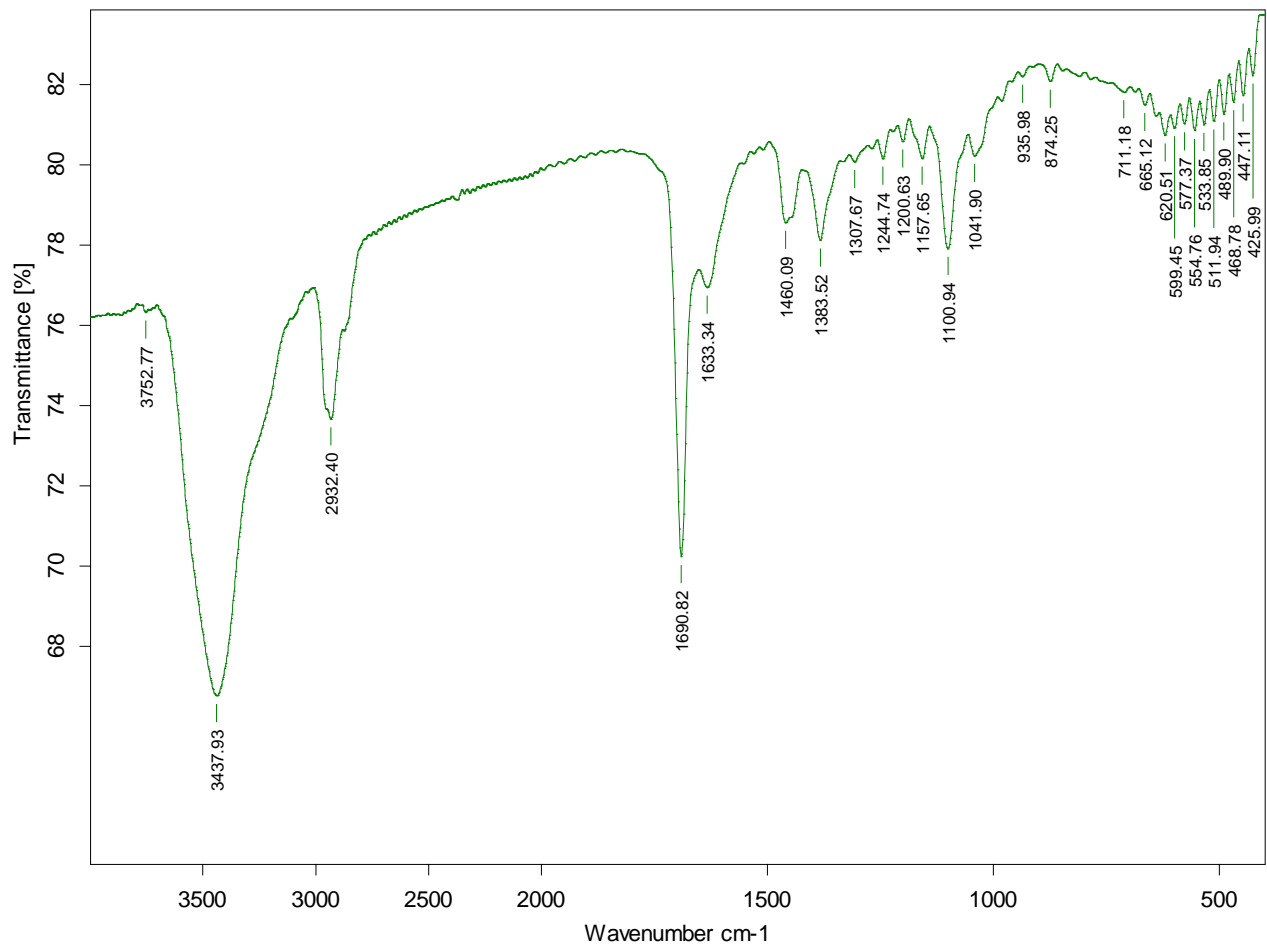

**Figure S74.** IR of compound **7**

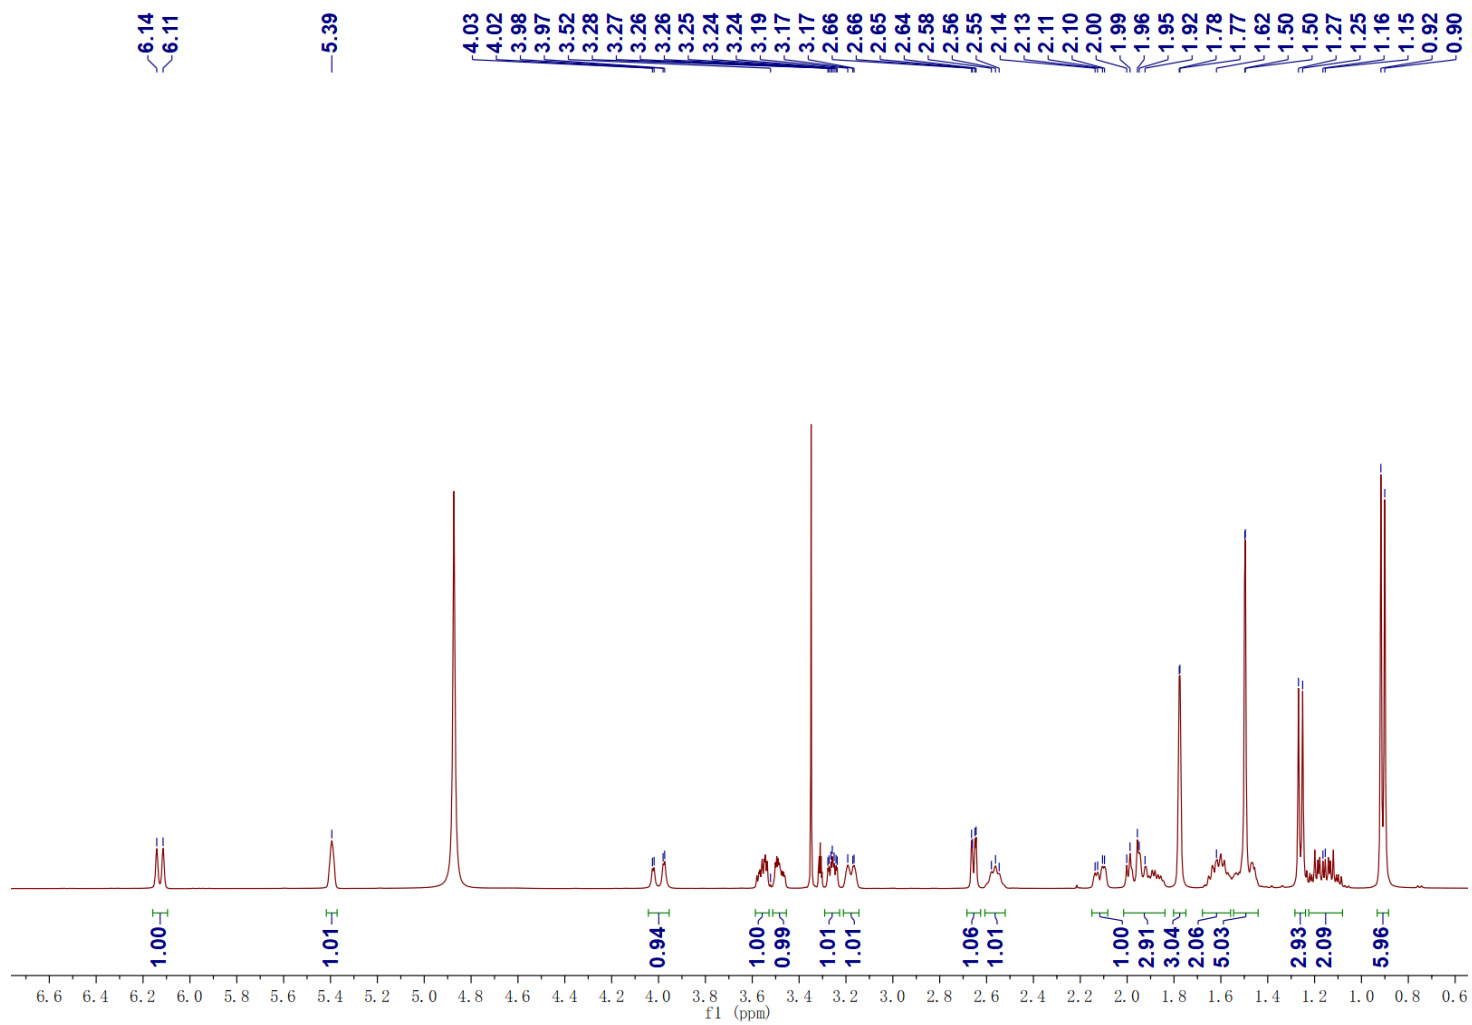

Figure S75.  $^1\text{H}$  NMR of compound **8** (in  $\text{CD}_3\text{OD}$ )

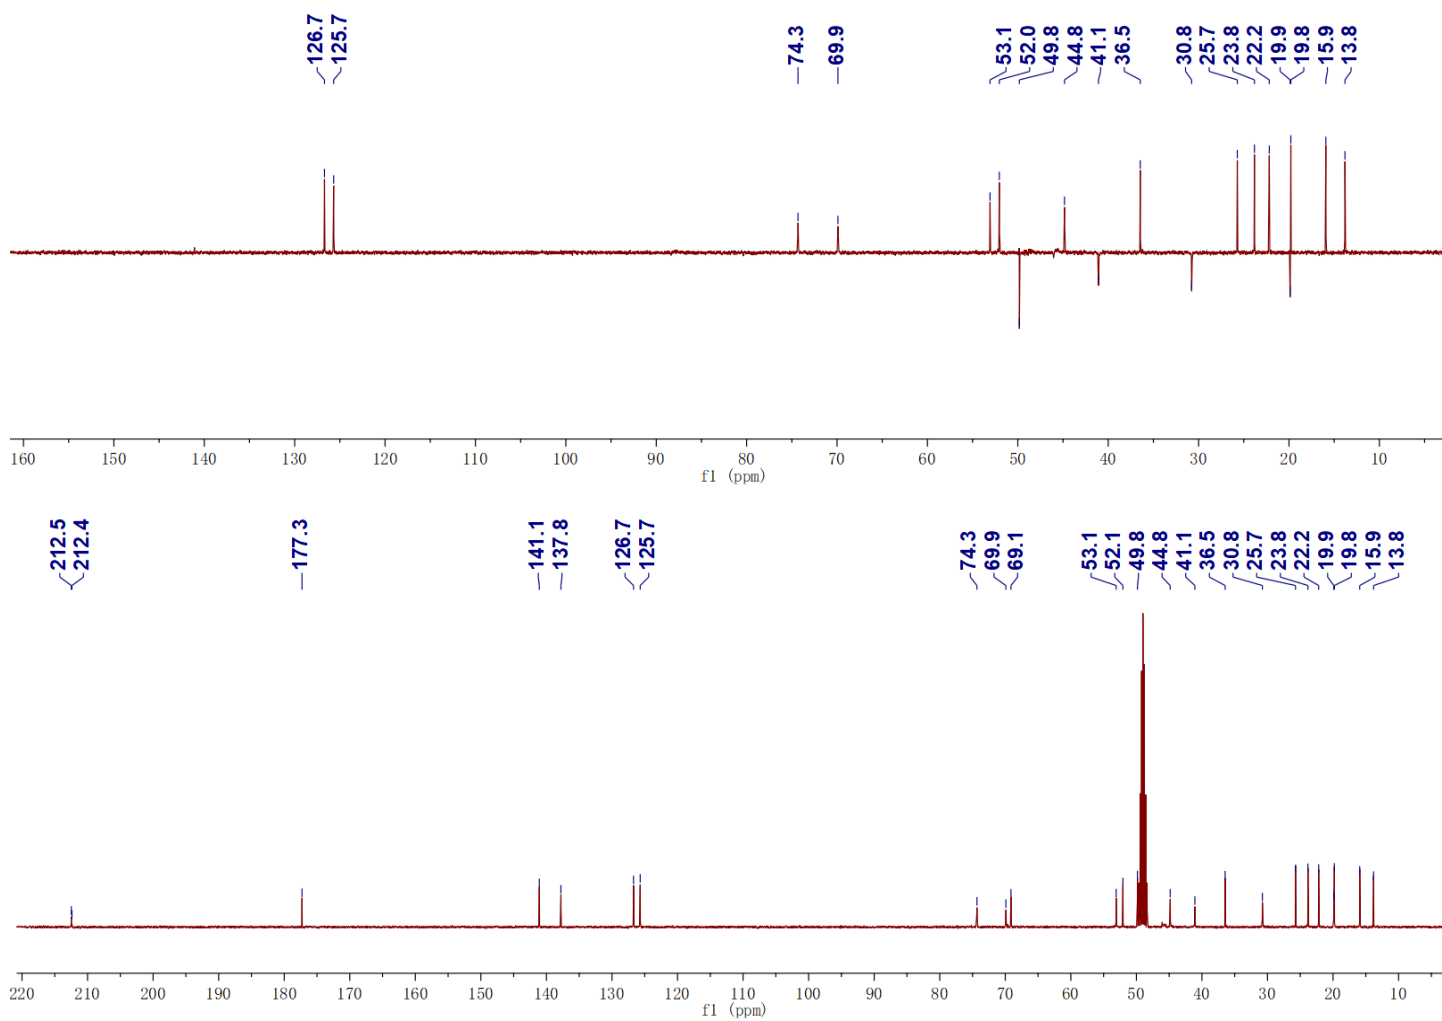

Figure S76. <sup>13</sup>C NMR of compound 8 (in CD<sub>3</sub>OD)

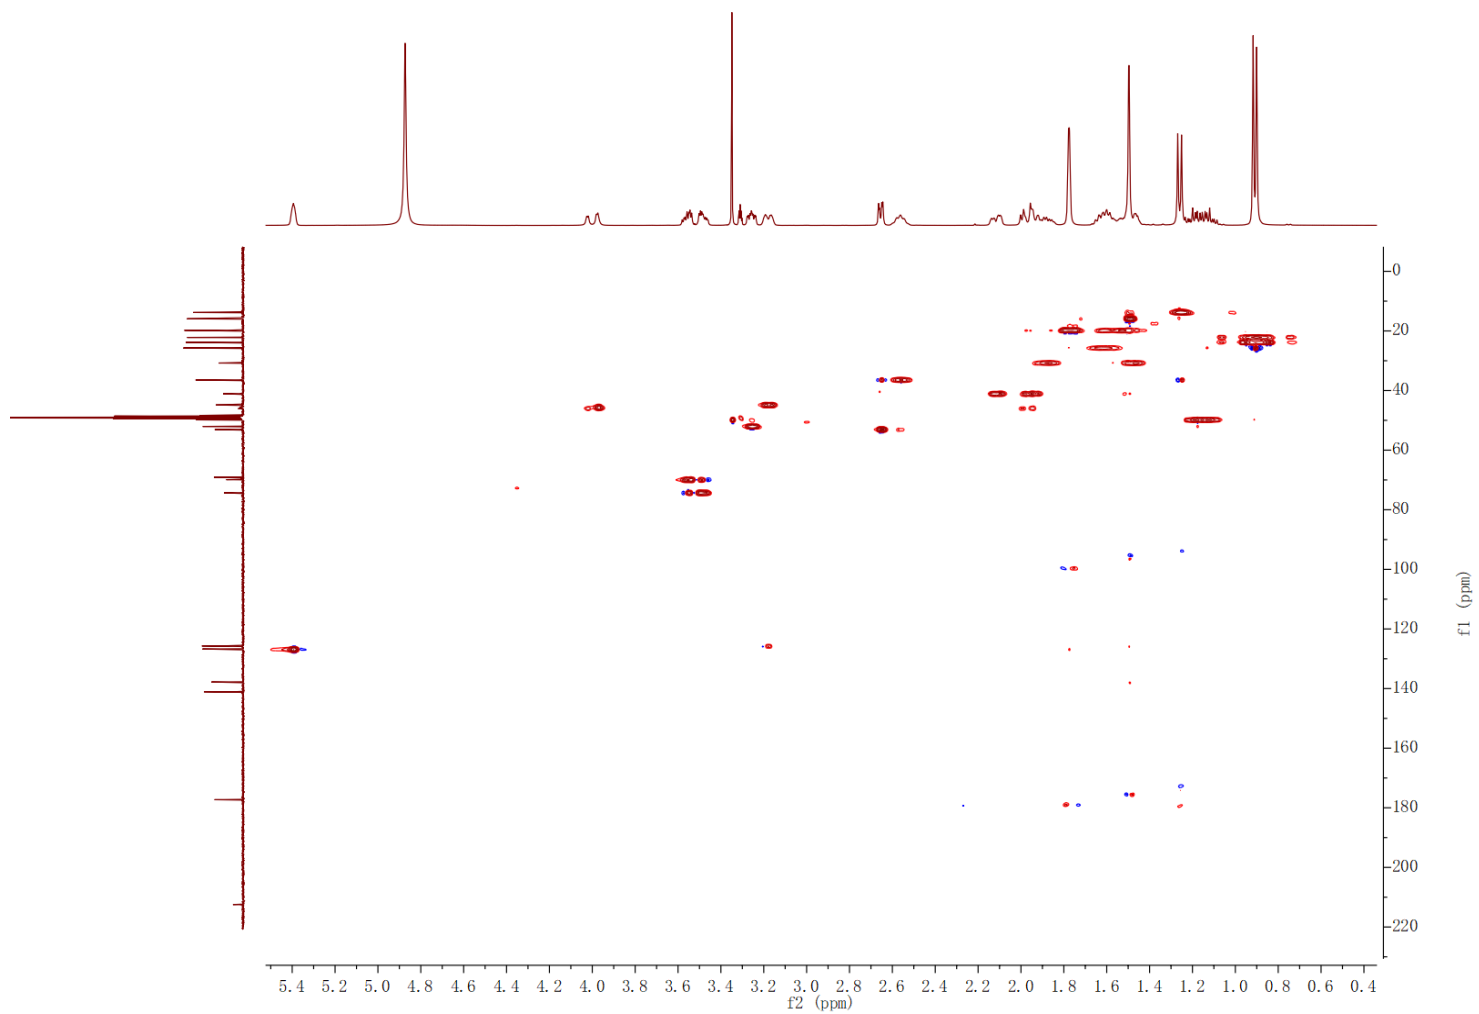

**Figure S77.** HSQC of compound **8** (in CD<sub>3</sub>OD)

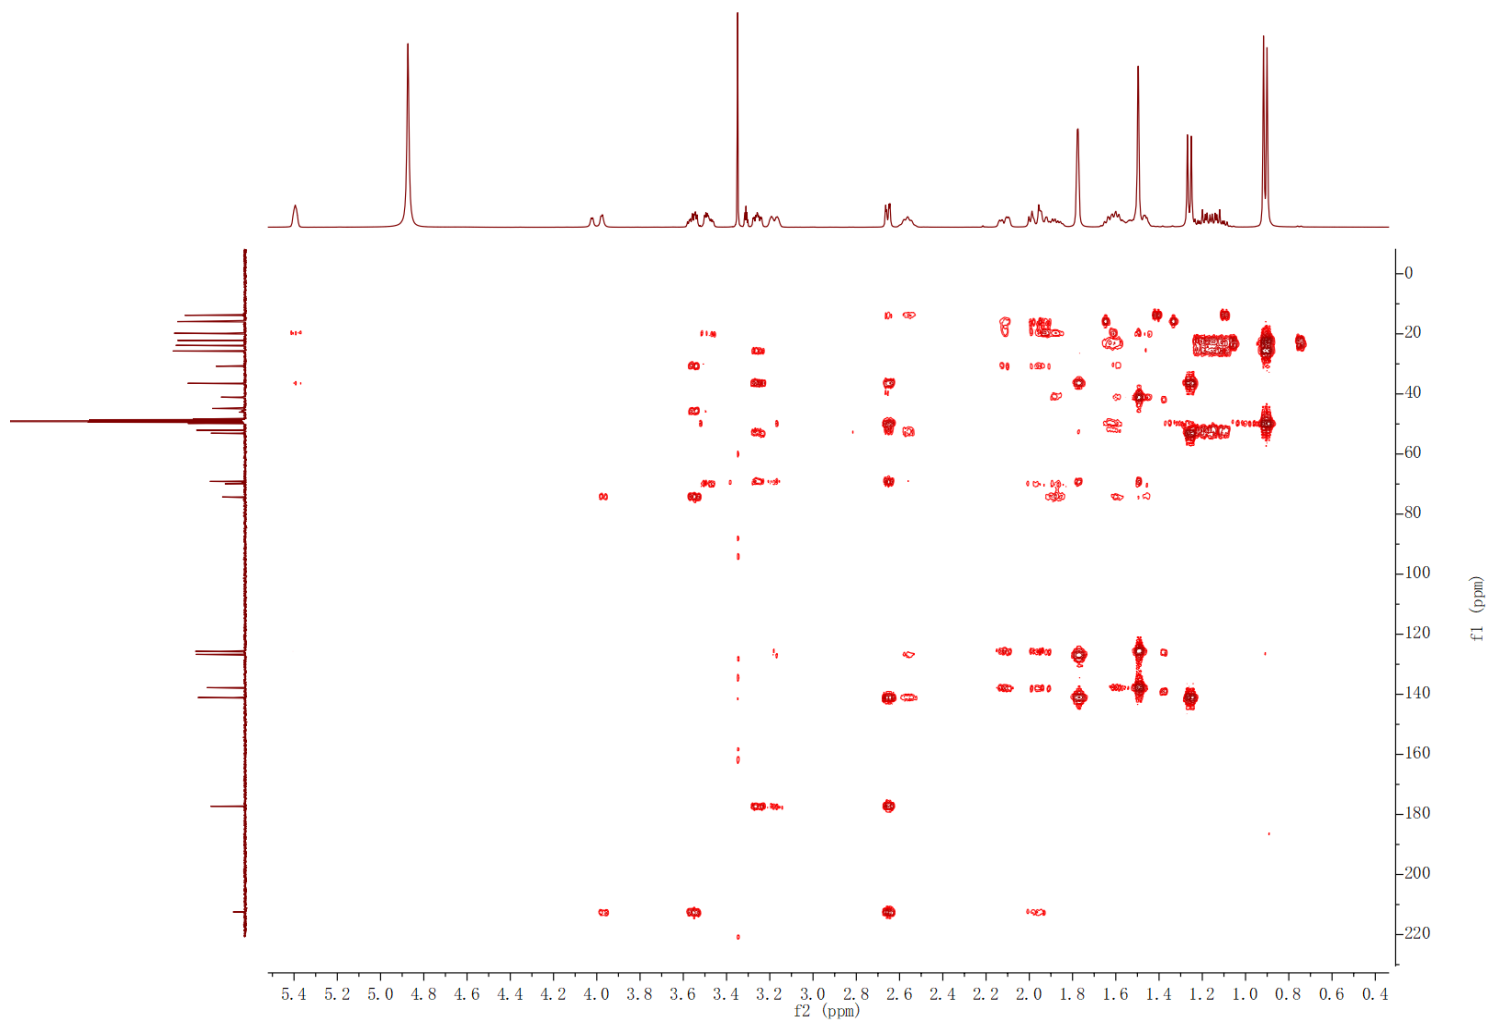

**Figure S78.** HMBC of compound **8** (in CD<sub>3</sub>OD)

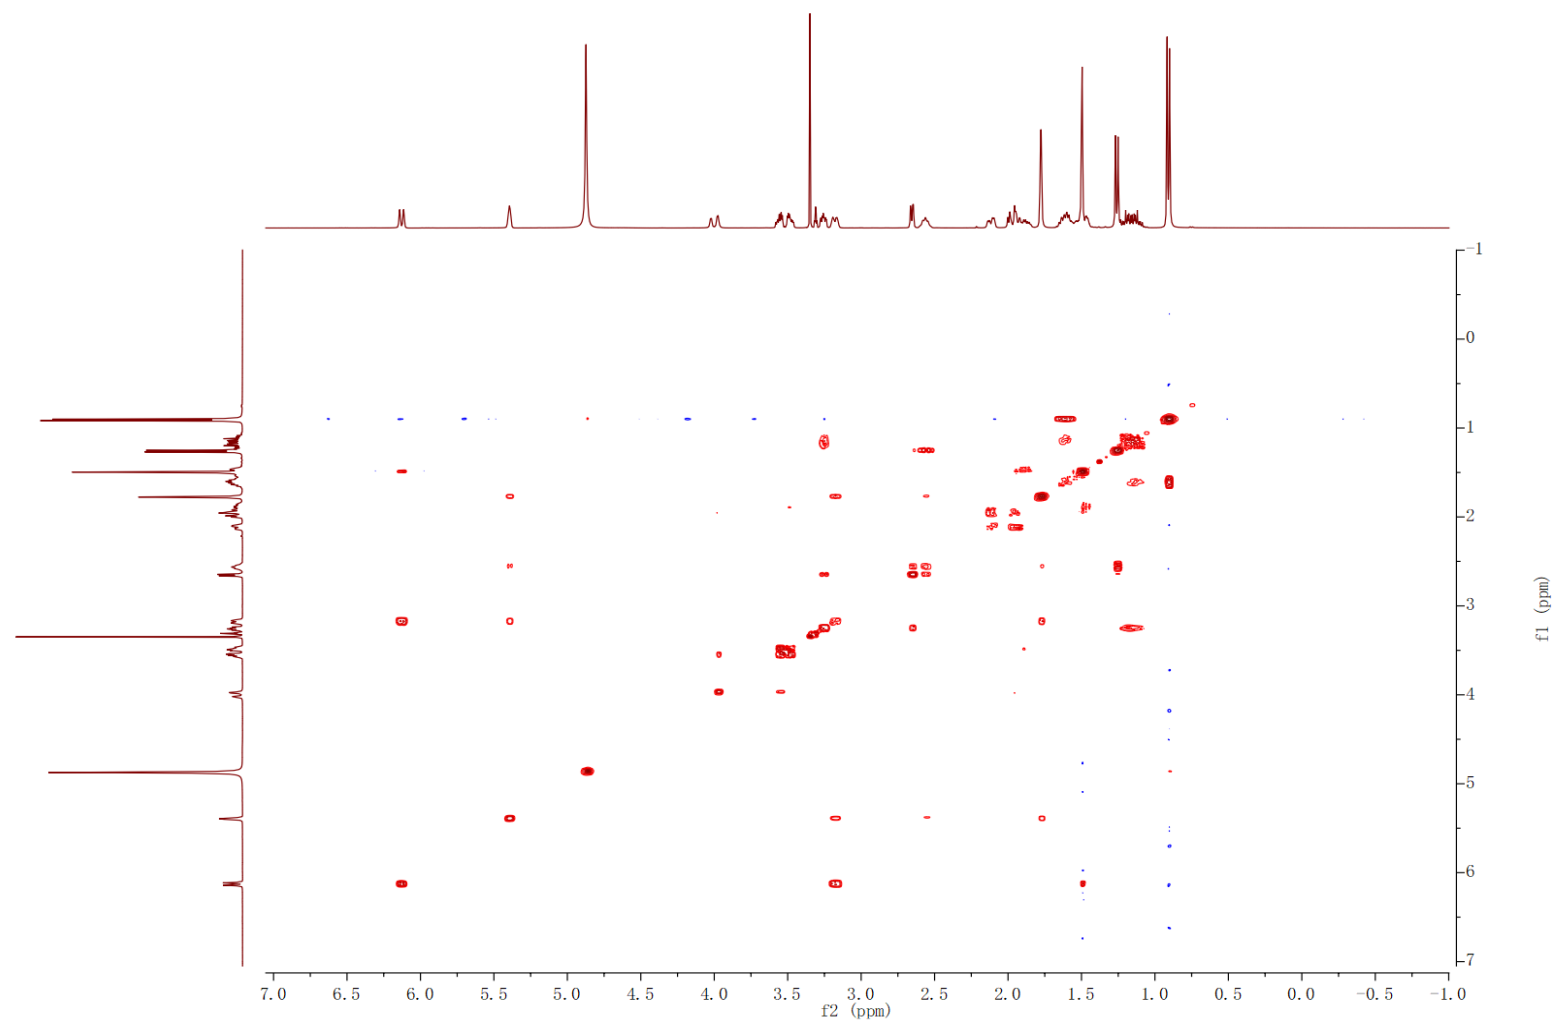

**Figure S79.**  $^1\text{H}$ - $^1\text{H}$  COSY of compound **8** (in  $\text{CD}_3\text{OD}$ )

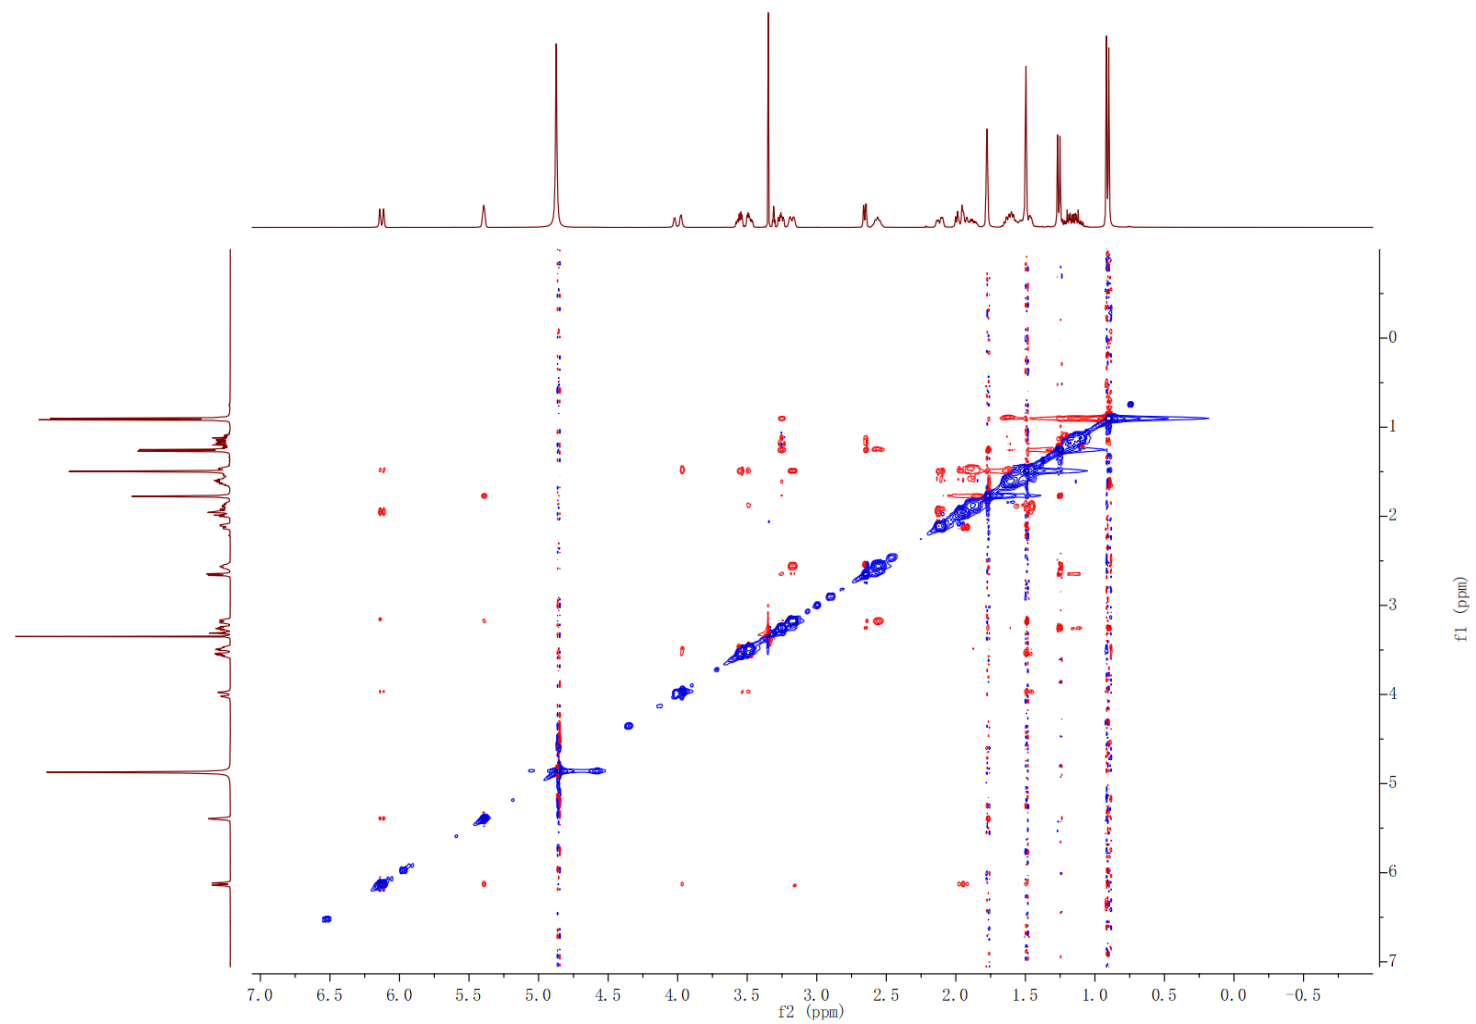

**Figure S80.** NOESY of compound **8** (in CD<sub>3</sub>OD)



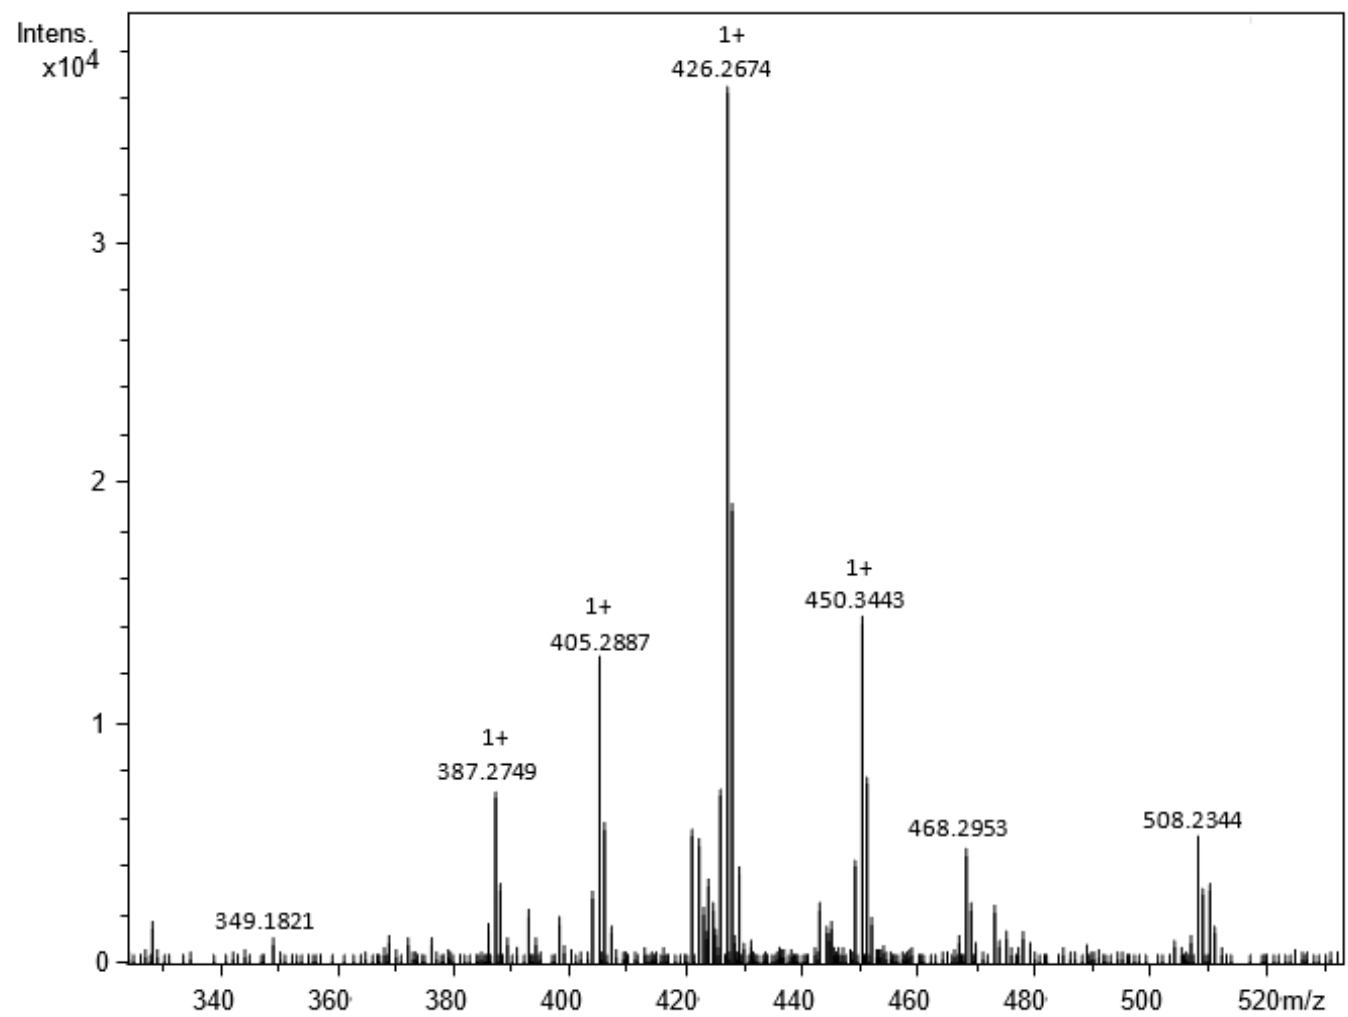

Figure S81. HRESIMS of compound 8

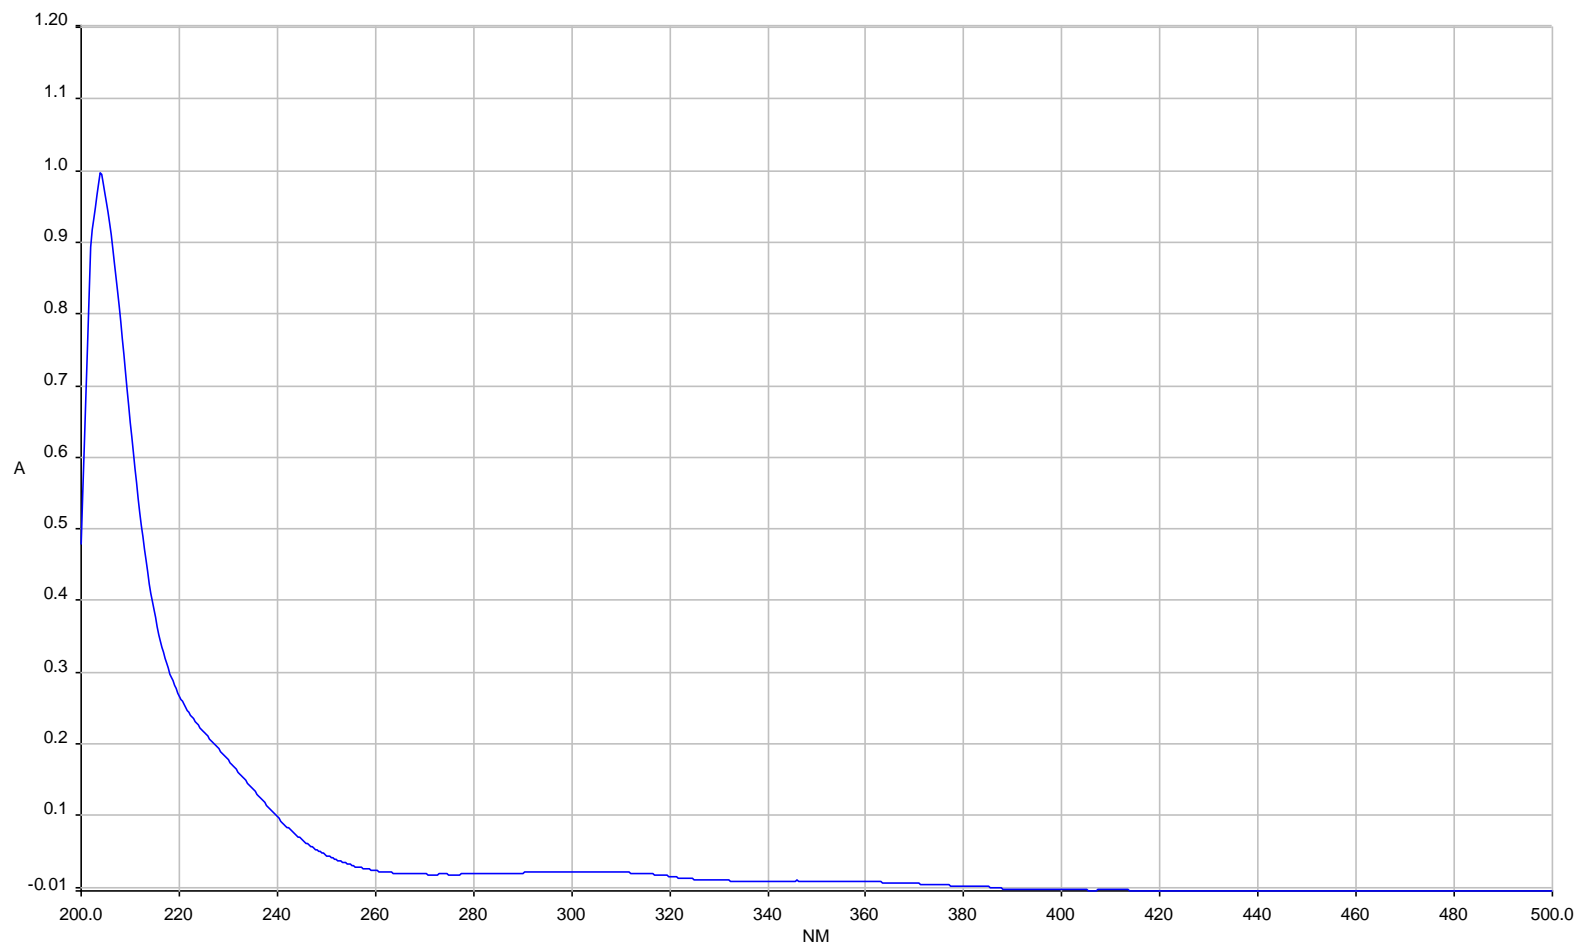

**Figure S82. UV of compound 8**

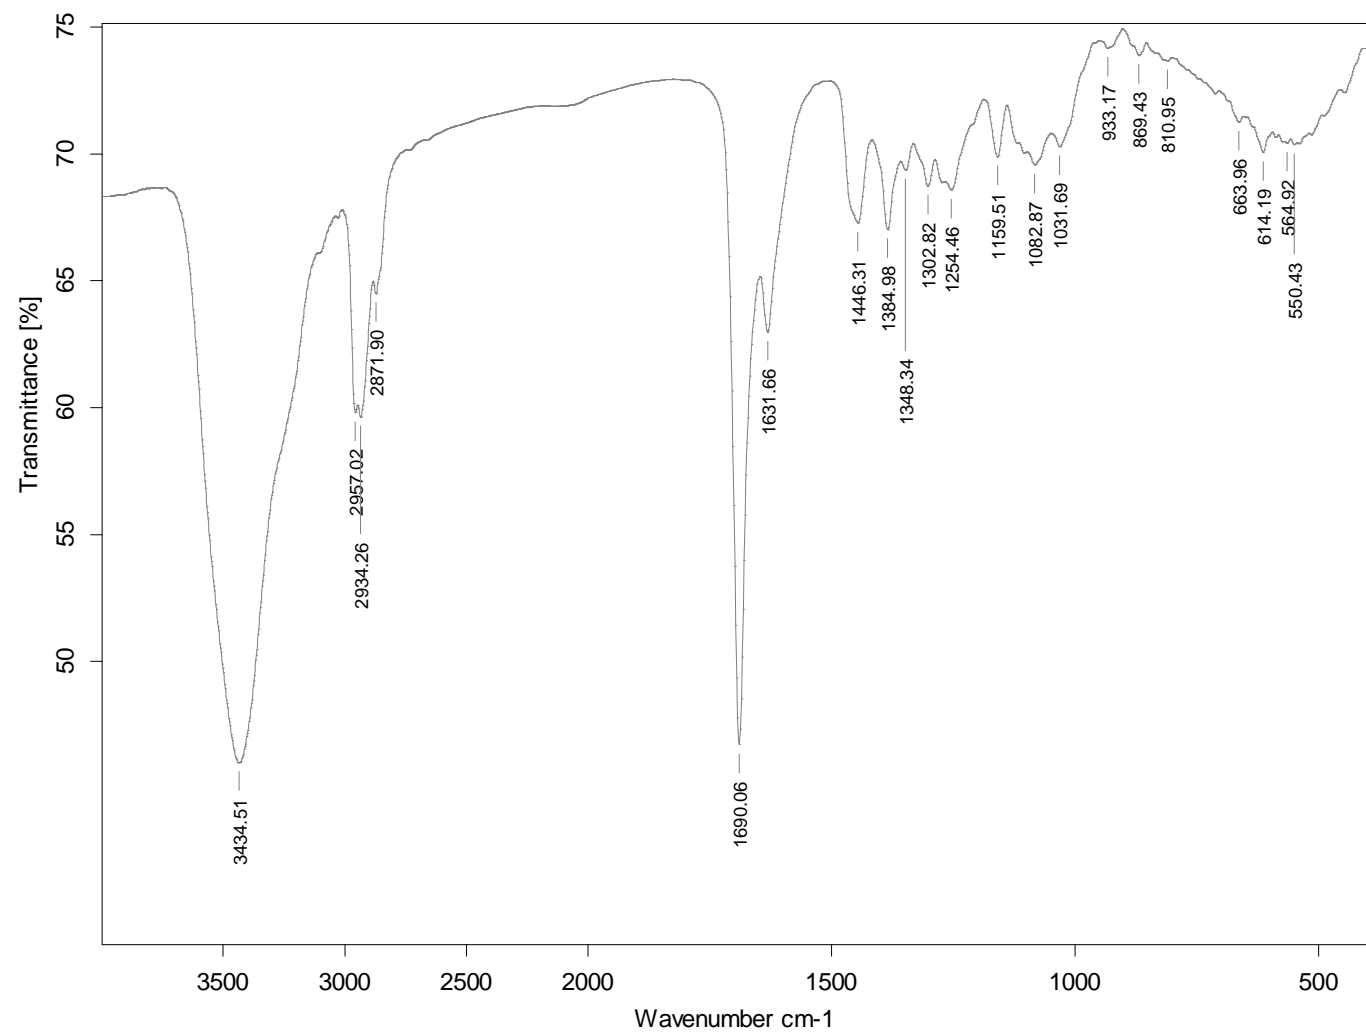

**Figure S83.** IR of compound **8**

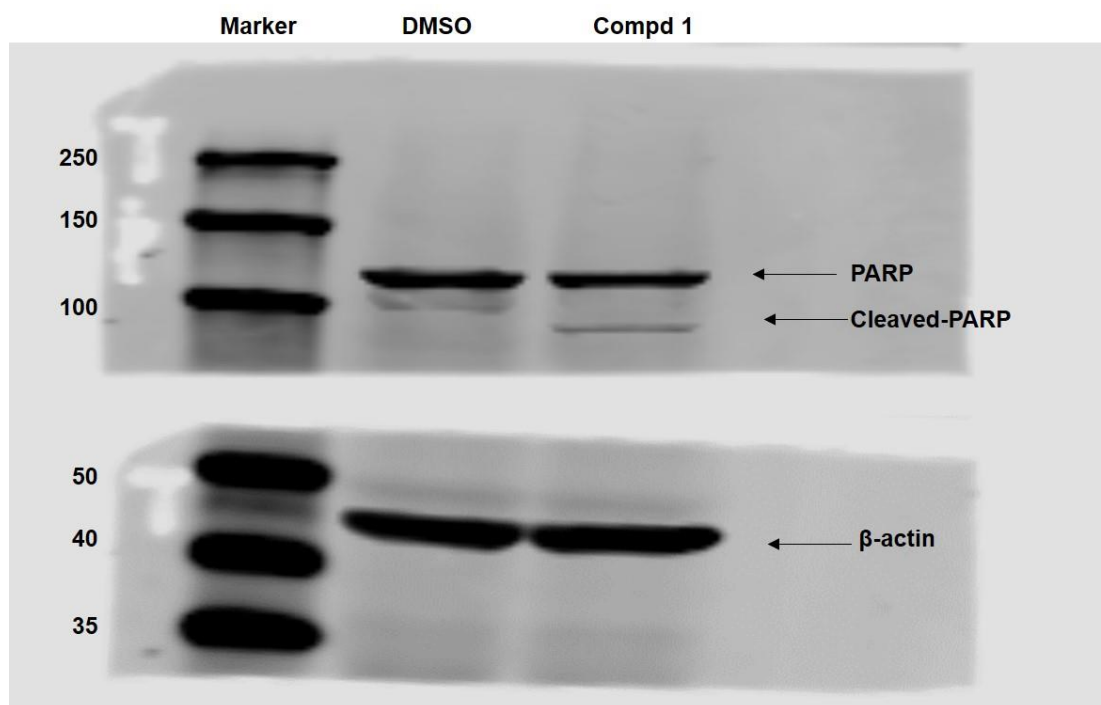

**Figure S84.** Complete western blotting pictures.
